# Supplementary material
Source: Royal Society of Chemistry journal article supplement (doi:10.1039/d6qo00478d)
Supplement: d6qo00478d1.pdf [file d6qo00478d1.pdf]

## Formal *meta*-Selective C–H Acylation of Pyridines *via* the Triplet

### State of Oxazinopyridine Intermediates

Fan Gao<sup>a,‡</sup>, Yajing Bian<sup>a, ‡</sup>, Shiqing Huang<sup>a\*</sup> and Xiaoyu Yan<sup>a\*</sup>

<sup>a</sup>Key Laboratory of Advanced Light Conversion Materials and Biophotonics, School of Chemistry and Life Resources, Renmin University of China, Beijing, 100872, China. E-mail: yanxy@ruc.edu.cn

<sup>‡</sup>F. G. and Y. B. contributed equally to this work.

#### Table of Contents

|                                                                            |     |
|----------------------------------------------------------------------------|-----|
| 1. General information .....                                               | S2  |
| 2. Emission spectrum of photoreactor lamp .....                            | S2  |
| 3. Synthesis and characterization data of substrates .....                 | S2  |
| 4. General Procedures .....                                                | S4  |
| 5. Conditions Optimization .....                                           | S5  |
| 6. Control experiments .....                                               | S7  |
| 7. Cyclic voltammetry studies .....                                        | S8  |
| 8. UV-vis Absorption Spectra .....                                         | S9  |
| 9. Stern-Volmer fluorescence quenching experiments .....                   | S10 |
| 10. On/off experiments .....                                               | S10 |
| 11. Proposed mechanism .....                                               | S11 |
| 12. Characterization data of products .....                                | S11 |
| 13. Computational Study .....                                              | S18 |
| 14. <sup>1</sup> H, <sup>13</sup> C, and <sup>19</sup> F NMR spectra ..... | S44 |
| 15. Reference .....                                                        | S76 |

## 1. General information

All reagents were purchased and used directly without further purification. All reactions were monitored by thin-layer chromatography (TLC), and column chromatography was performed on 200–300 mesh of silica gel purchased from Qing Dao Hai Yang Chemical Industry.  $^1\text{H}$ ,  $^{13}\text{C}$  and  $^{19}\text{F}$  NMR spectra were recorded on a Bruker Ascend 600 MHz spectrometer operating at 600 MHz, 151 MHz and 564 MHz, respectively. All NMR spectra were recorded in  $\text{CDCl}_3$  or  $\text{CD}_3\text{CN}$  at room temperature ( $20 \pm 2$  °C). Proton chemical shifts  $\delta$  were given in ppm relative to tetramethylsilane (0.00 ppm) in  $\text{CDCl}_3$ . Spectra were calibrated relative to solvent's residual proton and carbon chemical shift:  $\text{CHCl}_3$  ( $\delta = 7.26$  ppm for  $^1\text{H}$  NMR and  $\delta = 77.16$  ppm for  $^{13}\text{C}$  NMR),  $\text{CH}_3\text{CN}$  ( $\delta = 1.94$  ppm for  $^1\text{H}$  NMR and  $\delta = 118.26$  ppm for  $^{13}\text{C}$  NMR). Data are reported as follows: chemical shift, multiplicity (s = singlet, d = doublet, t = triplet, q = quartet, brs = broad singlet, m = multiplet), coupling constants (Hz) and integration. All reactions have been studied in borosilicate glass vessels irradiated by white light from a photoreactor (RLH-18CU) manufactured by Beijing Roger Technology Co., Ltd. without using filters with magnetic stirring apparatus. High-resolution mass spectra (HRMS) were acquired on Thermo Q-Exactive instrument (quadrupole mass analyzer) using electrospray ionization mode (ESI). UV-vis absorption spectra were obtained with Agilent Cary60 spectrophotometer. Fluorescence spectra were obtained with Edinburgh Instruments Ltd. FS5 spectrophotometer. Cyclic voltammetry of the compounds was carried out with Shanghai Zhenhua CHI 600D electrochemical workstation.

## 2. Emission spectrum of photoreactor lamp

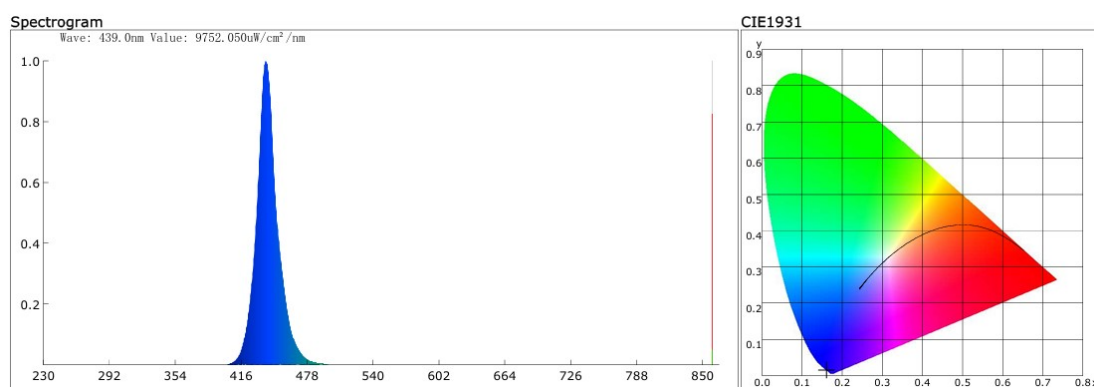

Figure S1. The emission spectrum of our lamp (blue LED 440 nm).

## 3. Synthesis and characterization data of substrates

Starting material oxazino pyridines **1** were synthesized according to the literature<sup>1</sup>. Starting material acyl azolium salts **2**<sup>2-4</sup> or sulfonyl azolium salts **4**<sup>5</sup> were synthesized according to the literature.



afforded the title compound as an yellow solid;  $^1\text{H}$  NMR (600 MHz,  $\text{CDCl}_3$ )  $\delta$  6.26-6.24 (m, 1H), 5.75-5.59 (m, 1H), 5.33 – 5.19 (m, 2H), 3.91 (s, 3H), 3.77-3.74 (m, 3H), 3.71-3.70 (m, 3H), 2.37 (p,  $J$ = 6.8 Hz, 1H), 1.06 (dd,  $J$ = 6.9, 5.4 Hz, 6H);  $^{13}\text{C}\{^1\text{H}\}$  NMR (151 MHz,  $\text{CDCl}_3$ )  $\delta$  171.4, 164.8, 163.8, 144.1, 142.5, 125.1, 109.1, 102.6, 79.9, 53.3, 52.8, 52.0, 33.1, 24.0, 21.4, 21.2.

*2-(3-fluorobenzoyl)-1,3-dimethyl-1H-imidazol-3-ium trifluoromethanesulfonate (2h)*

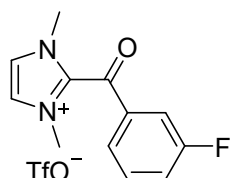

White solid;  $^1\text{H}$  NMR (600 MHz, Acetonitrile- $d_3$ )  $\delta$  7.75 – 7.65 (m, 3H), 7.61 (m, 3H), 3.77 (s, 6H);  $^{13}\text{C}\{^1\text{H}\}$  NMR (151 MHz, Acetonitrile- $d_3$ )  $\delta$  180.4, 163.9 (d,  $J_{\text{C-F}}$  = 248.1 Hz), 137.7 (d,  $J_{\text{C-F}}$  = 7.1 Hz), 132.9 (d,  $J_{\text{C-F}}$  = 7.9 Hz), 127.48, 127.46, 126.5, 124.2 (d,  $J_{\text{C-F}}$  = 21.3 Hz), 117.2 (d,  $J_{\text{C-F}}$  = 23.2 Hz), 38.3;  $^{19}\text{F}$  NMR (564 MHz, Acetonitrile- $d_3$ )  $\delta$  -80.12, -112.83.

*2-(4-iodobenzoyl)-1,3-dimethyl-1H-imidazol-3-ium trifluoromethanesulfonate (2m)*

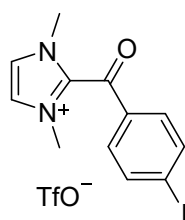

White solid;  $^1\text{H}$  NMR (600 MHz, Acetonitrile- $d_3$ )  $\delta$  8.07 (dd,  $J$  = 8.7, 1.0 Hz, 2H), 7.63 – 7.60 (m, 2H), 7.58 (dd,  $J$  = 2.5, 1.3 Hz, 2H), 3.75 (s, 6H);  $^{13}\text{C}\{^1\text{H}\}$  NMR (151 MHz, Acetonitrile- $d_3$ )  $\delta$  181.0, 140.0, 135.1, 132.2, 126.4, 105.9, 38.3;  $^{19}\text{F}$  NMR (564 MHz, Acetonitrile- $d_3$ )  $\delta$  -79.29.

*2-(benzo[b]thiophene-2-carbonyl)-1,3-dimethyl-1H-imidazol-3-ium trifluoromethanesulfonate (2o)*

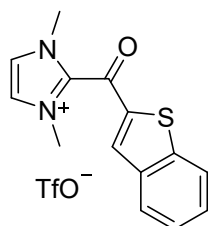

Yellow solid;  $^1\text{H}$  NMR (600 MHz, Acetonitrile- $d_3$ )  $\delta$  8.18 (d,  $J$  = 1.7 Hz, 1H), 8.09 – 8.05 (m, 2H), 7.69 – 7.66 (m, 1H), 7.62 – 7.60 (m, 2H), 7.57 (dt,  $J$  = 8.2, 0.9 Hz, 1H), 3.86 (s, 6H);  $^{13}\text{C}\{^1\text{H}\}$  NMR (151 MHz, Acetonitrile- $d_3$ )  $\delta$  174.4, 145.2, 141.1, 139.8, 139.11, 139.13, 131.2, 128.6, 127.2, 126.1, 124.3, 38.0;  $^{19}\text{F}$  NMR (564 MHz, Acetonitrile- $d_3$ )  $\delta$  -79.32.

#### 4. General Procedures

In an argon-filled glovebox, oxazino pyridines **1** (0.1 mmol), acyl azolium salts **2** or sulfonyl azolium salts **4** (2.0 equiv),  $[\text{Ir}(\text{dF}(\text{CF}_3)\text{ppy})(\text{dtbpy})]\text{PF}_6$  (2 mol%),  $\text{Cs}_2\text{CO}_3$  (0.2 equiv), and KI (2.0

equiv) were sequentially added in a 25 mL reaction *vial*. The reaction *vial* was added MeCN (0.05 M). The *vial* was sealed and placed in a photoreactor (RLH-18CU). The reaction mixture was irradiated with blue LED ( $\lambda = 440$  nm, 15 W) at room temperature for 24 h. After that, 6 M HCl (2 ml, equal to the volume of solvents) was added to the reaction mixture and the *vial* was heated at 60 °C for 36 h. then stirred at 60 °C and in air for 24 h. After completion, the reaction mixture was basified with saturated Na<sub>2</sub>CO<sub>3</sub> and extracted by dichloromethane (3 x 5 mL). The combined organic phase was dried over Na<sub>2</sub>SO<sub>4</sub> and filtered. The crude mixture was concentrated under reduced pressure. The resulting residue was purified by flash column chromatography to afford the desired product.

## 5. Conditions Optimization

**Table S1.** Optimization of the photocatalysts and wavelength <sup>[a]</sup>

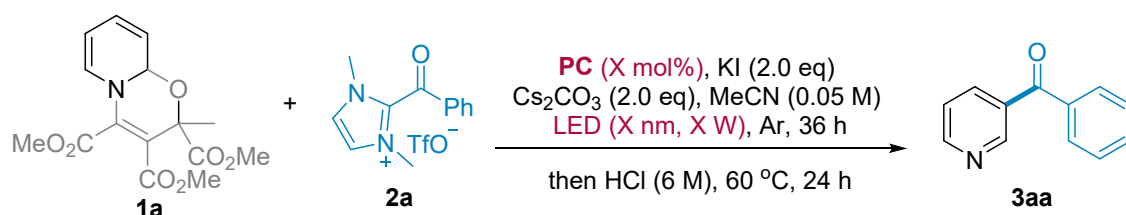

| Entry | PC (X mol%)                                                     | Wavelength (nm, W) | Yield <b>3aa</b> [%] |
|-------|-----------------------------------------------------------------|--------------------|----------------------|
| 1     | [Ir(dF(CF <sub>3</sub> )ppy)(dtbpy)]PF <sub>6</sub> (2 mol%)    | 440, 15            | 74                   |
| 2     | Ir(ppy) <sub>3</sub> (2 mol%)                                   | 440, 15            | 38                   |
| 3     | Ir(dFppy) <sub>3</sub> (2 mol%)                                 | 440, 15            | 63                   |
| 4     | [Ru(bpy) <sub>3</sub> ](PF <sub>6</sub> ) <sub>2</sub> (2 mol%) | 440, 15            | 53                   |
| 5     | Esoin Y-Na <sub>2</sub> (5 mol%)                                | 440, 15            | 25                   |
| 6     | [Ir(dF(CF <sub>3</sub> )ppy)(dtbpy)]PF <sub>6</sub> (1 mol%)    | 440, 15            | 52                   |
| 7     | [Ir(dF(CF <sub>3</sub> )ppy)(dtbpy)]PF <sub>6</sub> (0 mol%)    | 440, 15            | 0                    |
| 8     | [Ir(dF(CF <sub>3</sub> )ppy)(dtbpy)]PF <sub>6</sub> (2 mol%)    | 410, 15            | 40                   |
| 9     | [Ir(dF(CF <sub>3</sub> )ppy)(dtbpy)]PF <sub>6</sub> (2 mol%)    | 455, 15            | 32                   |
| 10    | [Ir(dF(CF <sub>3</sub> )ppy)(dtbpy)]PF <sub>6</sub> (2 mol%)    | In dark            | 0                    |

<sup>[a]</sup> All reactions were performed by using **1a** (0.1 mmol), **2a** (2.0 equiv), **PC** (X mol%), KI (2.0 equiv), Cs<sub>2</sub>CO<sub>3</sub> (2.0 equiv), MeCN (0.05 M) under light (X nm, X W), stirred at room temperature and in Ar for 36 h; then added 6 M HCl, equal to the volume of solvents, stirred at 60 °C and in air for 24 h. <sup>a</sup> yield was determined by <sup>1</sup>H NMR.

**Table S2.** Optimization of the additives <sup>[a]</sup>

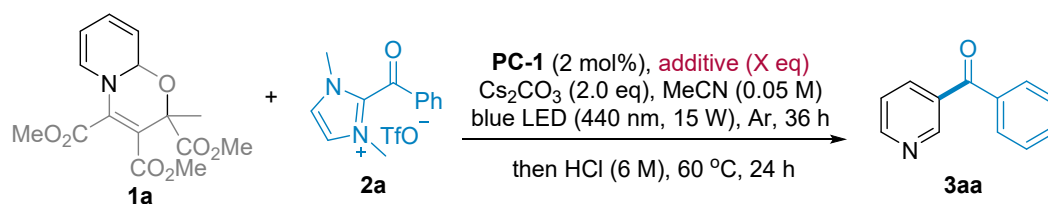

| Entry | Additives (X equiv) | Yield <b>3aa</b> [%] | Entry | Additives (X equiv) | Yield <b>3aa</b> [%] |
|-------|---------------------|----------------------|-------|---------------------|----------------------|
|-------|---------------------|----------------------|-------|---------------------|----------------------|

|   |            |    |    |                                                            |    |
|---|------------|----|----|------------------------------------------------------------|----|
| 1 | CsF (2.0)  | 46 | 9  | KBr (2.0)                                                  | 36 |
| 2 | NaF (2.0)  | 22 | 10 | NaI (2.0)                                                  | 68 |
| 3 | KF (2.0)   | 38 | 11 | KI (2.0)                                                   | 74 |
| 4 | NaCl (2.0) | 26 | 12 | 4-ClC <sub>6</sub> H <sub>4</sub> SO <sub>2</sub> Na (2.0) | 48 |
| 5 | KCl (2.0)  | 32 | 13 | KI (4.0)                                                   | 67 |
| 6 | LiCl (2.0) | 6  | 14 | KI (1.0)                                                   | 34 |
| 7 | CsBr (2.0) | 24 | 15 | KI (0.5)                                                   | 31 |
| 8 | NaBr (2.0) | 26 | 16 | KI (0)                                                     | 24 |

[a] All reactions were performed by using **1a** (0.1 mmol), **2a** (2.0 equiv), **PC-1** (2 mol%), additives (X equiv), Cs<sub>2</sub>CO<sub>3</sub> (2.0 equiv), MeCN (0.05 M) under blue LED (440 nm, 15 W), stirred at room temperature and in Ar for 36 h; then added 6 M HCl, equal to the volume of solvents, stirred at 60 °C and in air for 24 h. <sup>a</sup> yield was determined by <sup>1</sup>H NMR.

**Table S3.** Optimization of the bases [a]

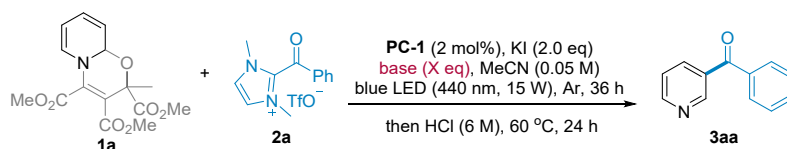

| Entry | Base (X equiv)                        | Yield <b>3aa</b> [%] |
|-------|---------------------------------------|----------------------|
| 1     | Cs <sub>2</sub> CO <sub>3</sub> (2.0) | 74                   |
| 2     | K <sub>2</sub> CO <sub>3</sub> (2.0)  | 53                   |
| 3     | Na <sub>2</sub> CO <sub>3</sub> (2.0) | 64                   |
| 4     | K <sub>3</sub> PO <sub>4</sub> (2.0)  | 62                   |
| 5     | <sup>t</sup> BuOK (2.0)               | 0                    |
| 6     | DBU (2.0)                             | 2                    |
| 7     | Cs <sub>2</sub> CO <sub>3</sub> (4.0) | 33                   |
| 8     | Cs <sub>2</sub> CO <sub>3</sub> (1.0) | 64                   |
| 9     | Cs <sub>2</sub> CO <sub>3</sub> (0.5) | 63                   |
| 10    | Cs <sub>2</sub> CO <sub>3</sub> (0.2) | 74                   |
| 11    | Cs <sub>2</sub> CO <sub>3</sub> (0)   | 52                   |

[a] All reactions were performed by using **1a** (0.1 mmol), **2a** (2.0 equiv), **PC-1** (2 mol%), KI (2.0 equiv), bases (X equiv), MeCN (0.05 M) under blue LED (440 nm, 15 W), stirred at room temperature and in Ar for 36 h; then added 6 M HCl, equal to the volume of solvents, stirred at 60 °C and in air for 24 h. <sup>a</sup> yield was determined by <sup>1</sup>H NMR.

**Table S4.** Optimization of the solvents [a]

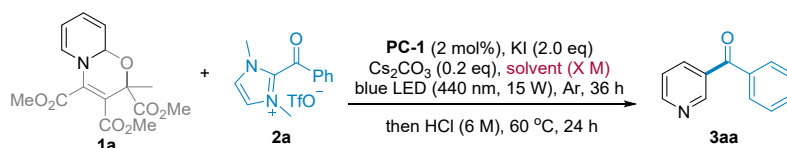

| Entry | Solvents (X M) | Yield <b>3aa</b> [%] |
|-------|----------------|----------------------|
| 1     | MeCN (0.05 M)  | 74                   |

|    |                |    |
|----|----------------|----|
| 2  | EA (0.05 M)    | 33 |
| 3  | DCM (0.05 M)   | 15 |
| 4  | DCE (0.05 M)   | 36 |
| 5  | DMSO (0.05 M)  | 39 |
| 6  | THF (0.05 M)   | 37 |
| 7  | DMF (0.05 M)   | 44 |
| 8  | PhCl (0.05 M)  | 6  |
| 9  | MTBE (0.05 M)  | 3  |
| 10 | MeCN (0.025 M) | 35 |
| 11 | MeCN (0.1 M)   | 46 |

<sup>[a]</sup> All reactions were performed by using **1a** (0.1 mmol), **2a** (2.0 equiv), **PC-1** (2 mol%), KI (2.0 equiv), Cs<sub>2</sub>CO<sub>3</sub> (0.2 equiv), solvents (X M) under blue LED (440 nm, 15 W), stirred at room temperature and in Ar for 36 h; then added 6 M HCl, equal to the volume of solvents, stirred at 60 °C and in air for 24 h. <sup>a</sup> yield was determined by <sup>1</sup>H NMR.

**Table S5.** Optimization of time <sup>[a]</sup>

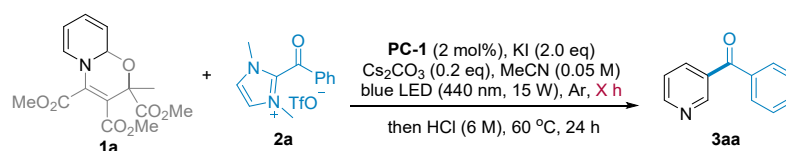

| Entry | Time (X h) | Yield <b>3aa</b> [%] |
|-------|------------|----------------------|
| 1     | 6          | 43                   |
| 2     | 12         | 44                   |
| 3     | 18         | 52                   |
| 4     | 24         | 57                   |
| 5     | 30         | 65                   |
| 6     | 36         | 74                   |

<sup>[a]</sup> All reactions were performed by using **1a** (0.1 mmol), **2a** (2.0 equiv), **PC-1** (2 mol%), KI (2.0 equiv), Cs<sub>2</sub>CO<sub>3</sub> (0.2 equiv), MeCN (0.05 M) under blue LED (440 nm, 15 W), stirred at room temperature and in Ar for X h; then added 6 M HCl, equal to the volume of solvents, stirred at 60 °C and in air for 24 h. <sup>a</sup> yield was determined by <sup>1</sup>H NMR.

## 6. Control experiments

**1a** (0.1 mmol), **2a** (2.0 equiv), **PC-1** (2 mol%), Cs<sub>2</sub>CO<sub>3</sub> (0.2 equiv), KI (2.0 equiv) and additives (4.0 equiv) including TEMPO and BHT were sequentially added in a 25 mL reaction vial. The reaction system added MeCN (0.05 M) was sealed under Ar and stirred under the irradiation of blue LED (440 nm, 15 W) at room temperature for 36 h, then added 6 M HCl, equal to the volume of solvents, stirred at 60 °C and in air for 24 h. After reaction, corresponding yields were determined by <sup>1</sup>H NMR of the reaction solution. Additionally, before adding 6 M HCl, equal to the volume of solvents, we successfully detected the adduct **A**, **B** and **C** by high-resolution mass spectrometry (HRMS)

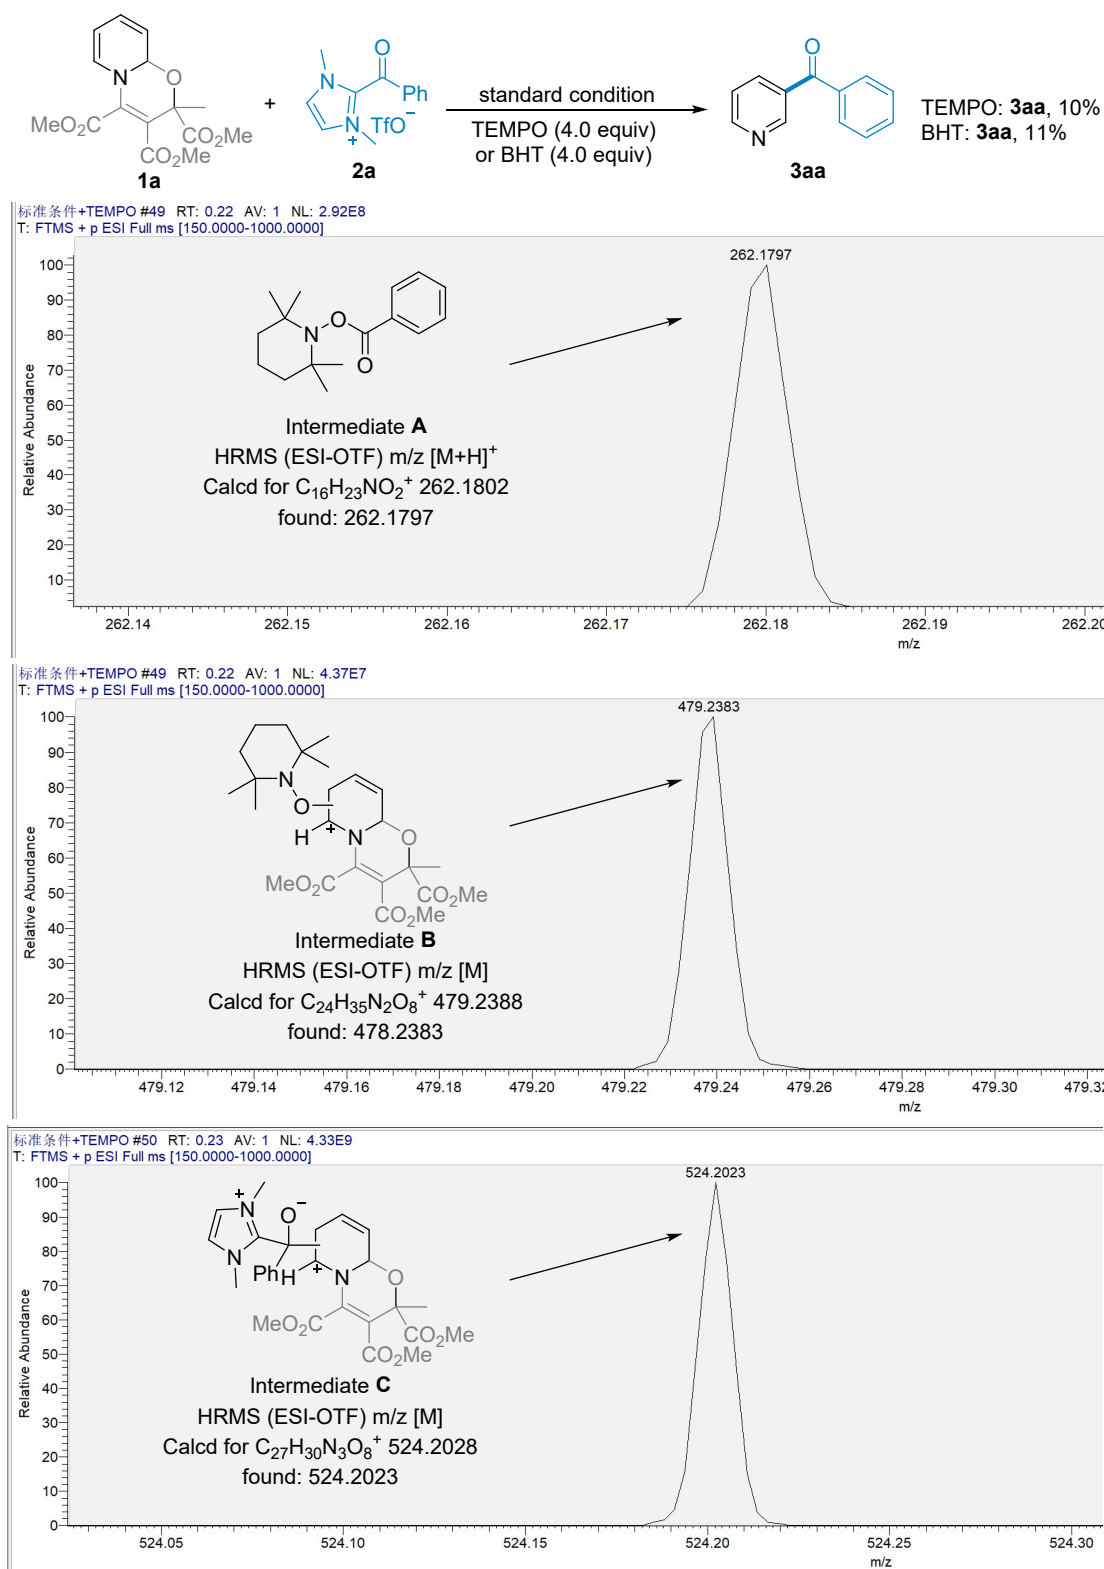

**Figure S4.** The mixture of reaction with TEMPO were detected by HRMS

## 7. Cyclic voltammetry studies

Cyclic voltammetry of the compounds was carried out with Shanghai Zhenhua CHI

600D electrochemical workstation. Samples **1a** ( $1 \times 10^{-3}$  M) were measured under inert atmosphere in an Ar atmosphere glovebox at room temperature in dry MeCN solution containing tetrabutylammonium hexafluorophosphate (0.1 M). The measurement was operated with a three-electrode setup containing a glassy carbon as working electrode, a platinum wire as a counter electrode, and an organic silver electrode as reference electrode. Unless otherwise stated, all CVs were run at a scan rate of 100 mV/s. Potentials were measured in MeCN with respect to Fc/Fc<sup>+</sup> ion pair (as external standard).

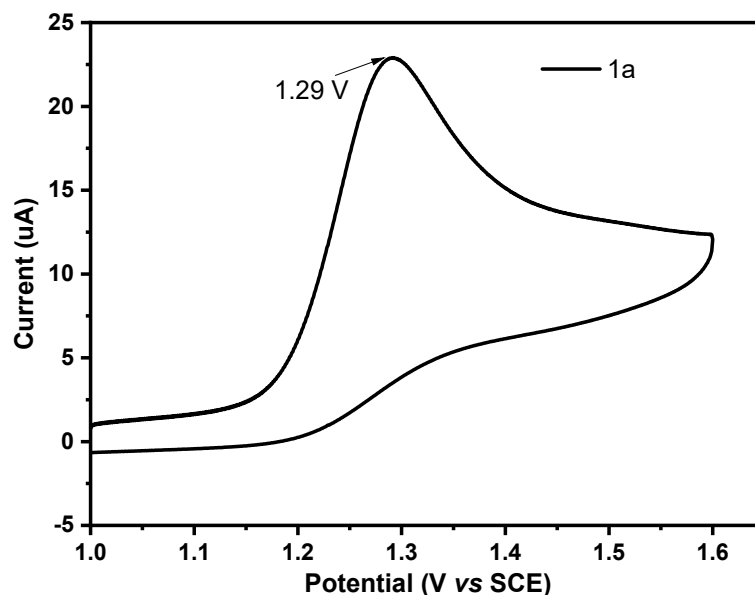

Figure S5. The cyclic voltammetry of **1a**

## 8. UV-vis Absorption Spectra

The UV-vis absorption spectra of sulfonium salts **1a** ( $2 \times 10^{-5}$  M), **2a** ( $2 \times 10^{-5}$  M), and **1a** + **2a** ( $2 \times 10^{-5}$  M) in MeCN were recorded in 1 cm path quartz cuvettes, respectively.

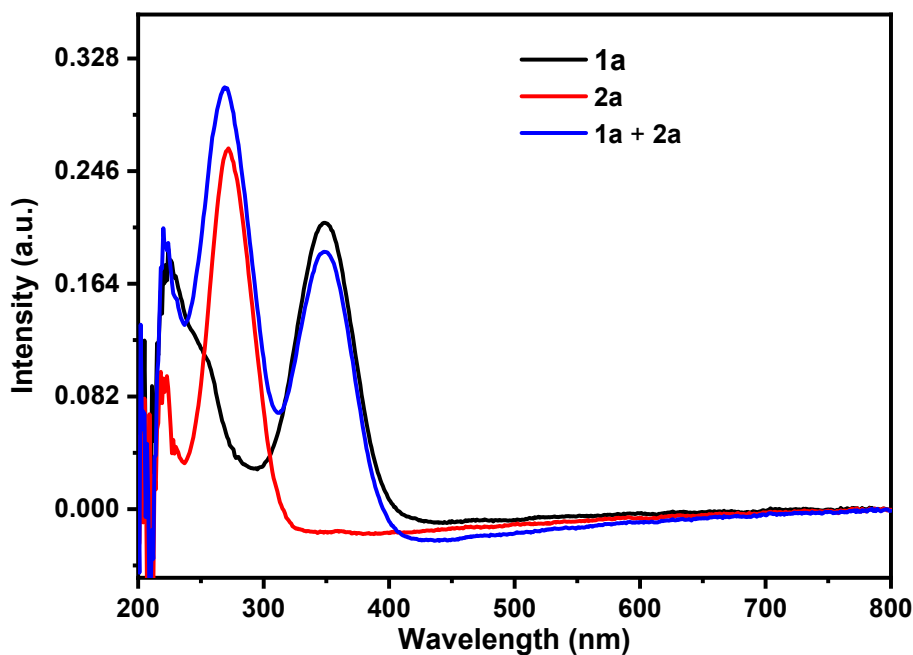

Figure S6. UV-vis absorption spectra

## 9. Stern-Volmer fluorescence quenching experiments

Emission intensities were recorded using Edinburgh Instruments Ltd. FS5 spectrophotometer. All Stern-Volmer fluorescence quenching experiments were excited at 375 nm and the emission intensity was collected at 450 nm. The fluorescence emission spectrum was measured from 400 nm to 650 nm. A freshly prepared solution of  $5 \times 10^{-5}$  M solution of PC-1 in dry and degassed MeCN was added the appropriate amount of a quencher (1a and 2a) in a screw-top quartz cuvette at room temperature.

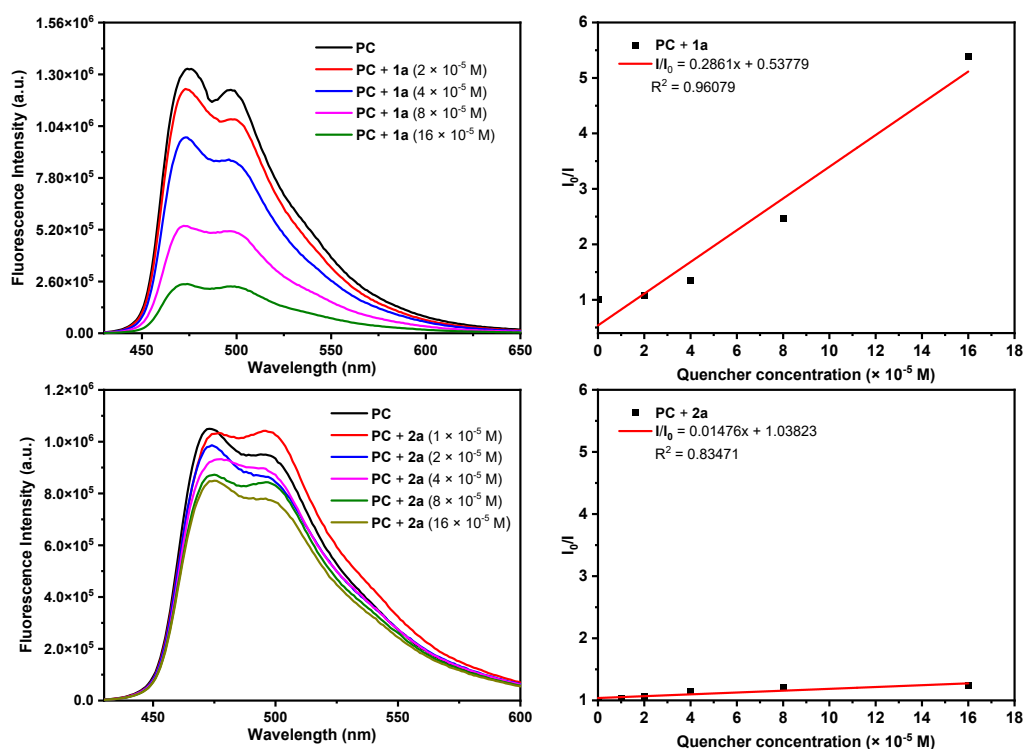

Figure S7. Fluorescence quenching experiments.

## 10. On/off experiments

The reactions were conducted under the standard conditions at sequential periods of visible light irradiation (15 W blue LED). After reaction, adding 6 M HCl, equal to the volume of solvents, corresponding yields of 3aa were determined by  $^1\text{H}$  NMR.

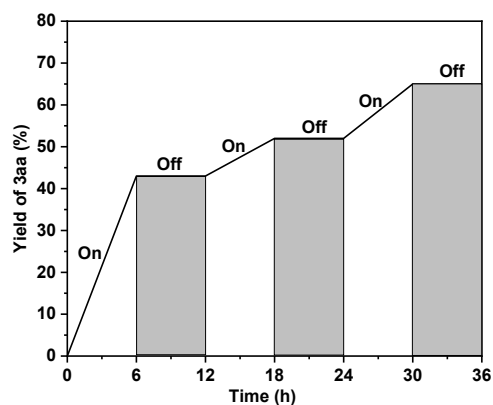

Figure S8. Visible light irradiation on/off experiments

## 11. Proposed mechanism

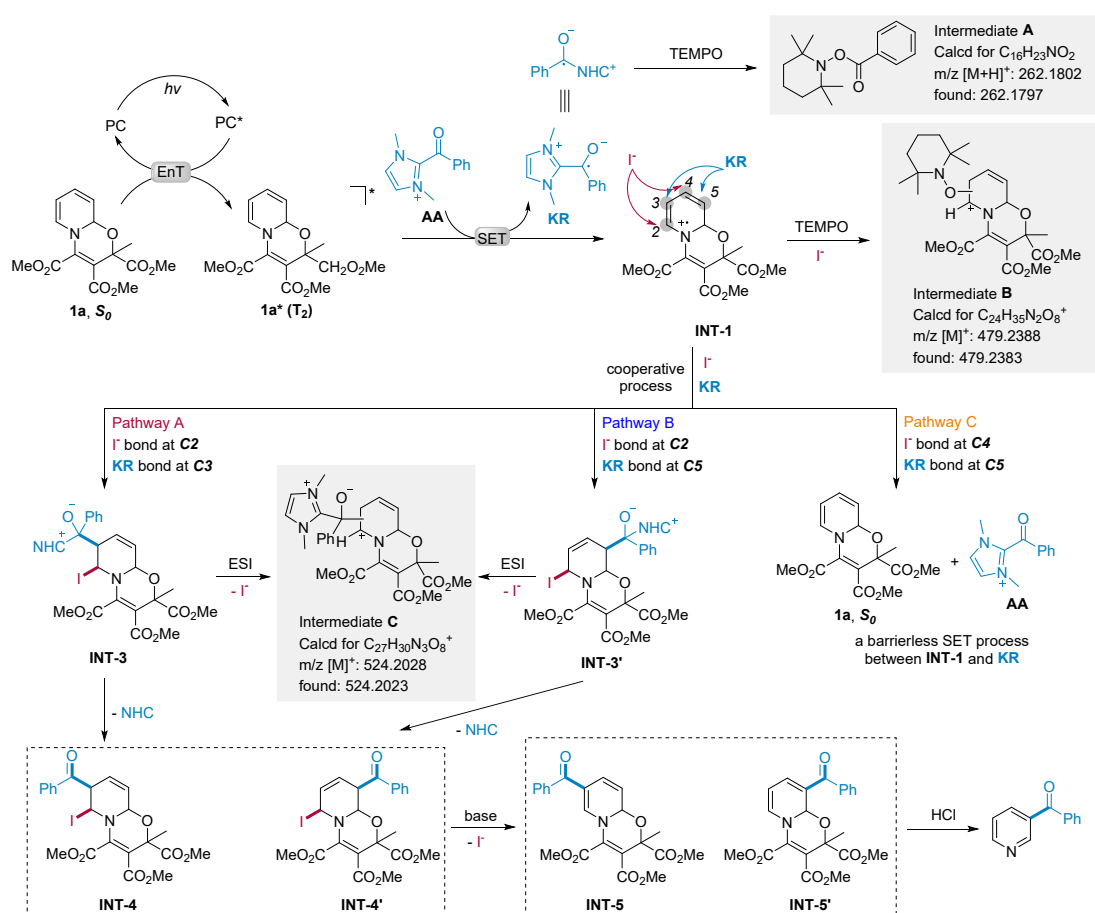

Figure S9. Proposed mechanism for *meta*-selective C–H acylation of pyridines

## 12. Characterization data of products

*phenyl(pyridin-3-yl)methanone (3aa)*<sup>6</sup>

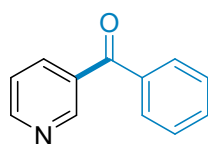

Purification by column chromatography on silica gel (eluting with pentane/ethyl acetate = 5/1, v/v)

afforded the title compound as a pale yellow solid (12.6 mg, 69% yield);  $^1\text{H}$  NMR (600 MHz,  $\text{CDCl}_3$ )  $\delta$  8.92 (s, 1H), 8.74 (d,  $J = 4.1$  Hz, 1H), 8.14 – 7.94 (m, 2H), 7.74 (d,  $J = 7.7$  Hz, 2H), 7.56 (t,  $J = 7.4$  Hz, 1H), 7.45 (t,  $J = 7.7$  Hz, 2H), 7.38 (dd,  $J = 7.8, 4.9$  Hz, 1H);  $^{13}\text{C}\{^1\text{H}\}$  NMR (151 MHz,  $\text{CDCl}_3$ )  $\delta$  195.0, 152.9, 151.0, 137.3, 136.8, 133.3, 130.1, 128.7, 123.5.

*(4-methoxyphenyl)(pyridin-3-yl)methanone (3ab)*<sup>7</sup>

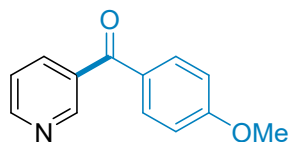

Purification by column chromatography on silica gel (eluting with pentane/ethyl acetate = 4/1, v/v) afforded the title compound as a pale yellow solid (11.3 mg, 53% yield);  $^1\text{H}$  NMR (600 MHz,  $\text{CDCl}_3$ )  $\delta$  8.88 (s, 1H), 8.72 (d,  $J = 4.1$  Hz, 1H), 8.03 – 7.95 (m, 2H), 7.76 (d,  $J = 8.8$  Hz, 2H), 7.37 (dd,  $J = 7.7, 4.9$  Hz, 1H), 6.92 (d,  $J = 8.8$  Hz, 2H), 3.83 (s, 3H);  $^{13}\text{C}\{^1\text{H}\}$  NMR (151 MHz,  $\text{CDCl}_3$ )  $\delta$  193.6, 163.9, 152.5, 150.6, 137.1, 134.0, 132.7, 129.5, 123.5, 114.0, 55.7.

*(4-(tert-butyl)phenyl)(pyridin-3-yl)methanone (3ac)*

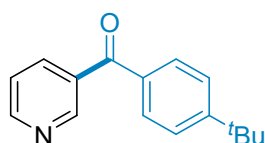

Purification by column chromatography on silica gel (eluting with pentane/ethyl acetate = 5/1, v/v) afforded the title compound as a pale yellow solid (12.9 mg, 54% yield);  $^1\text{H}$  NMR (600 MHz,  $\text{CDCl}_3$ )  $\delta$  8.93 – 8.91 (m, 1H), 8.73 (d,  $J = 3.7$  Hz, 1H), 8.08 – 8.00 (m, 1H), 7.70 (d,  $J = 8.4$  Hz, 2H), 7.45 (d,  $J = 8.4$  Hz, 2H), 7.37 (dd,  $J = 7.7, 4.9$  Hz, 1H), 1.30 (s, 9H);  $^{13}\text{C}\{^1\text{H}\}$  NMR (151 MHz,  $\text{CDCl}_3$ )  $\delta$  194.6, 157.2, 152.7, 150.9, 137.2, 134.1, 133.6, 130.2, 125.7, 123.4, 35.3, 31.2. HRMS (ESI-TOF)  $m/z$   $[\text{M} + \text{H}]^+$  calcd for  $\text{C}_{16}\text{H}_{18}\text{NO}$  240.1383, found 240.131.

*(4-fluorophenyl)(pyridin-3-yl)methanone (3ad)*<sup>8</sup>

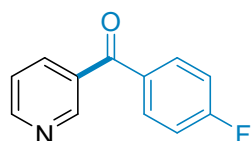

Purification by column chromatography on silica gel (eluting with pentane/ethyl acetate = 5/1, v/v) afforded the title compound as an orange solid (13.1 mg, 65% yield);  $^1\text{H}$  NMR (600 MHz,  $\text{CDCl}_3$ )  $\delta$  8.91 (s, 1H), 8.77 (s, 1H), 8.04 (d,  $J = 7.6$  Hz, 1H), 7.80 (dd,  $J = 8.7, 5.4$  Hz, 3H), 7.41 (s, 1H), 7.13 (t,  $J = 8.5$  Hz, 2H);  $^{13}\text{C}\{^1\text{H}\}$  NMR (151 MHz,  $\text{CDCl}_3$ )  $\delta$  193.5, 165.9 (d,  $J_{\text{C-F}} = 255.6$  Hz), 153.0, 150.7, 137.2, 133.3, 133.1 (d,  $J_{\text{C-F}} = 2.8$  Hz), 132.8 (d,  $J_{\text{C-F}} = 9.3$  Hz), 123.7, 116.0 (d,  $J_{\text{C-F}} = 22.0$  Hz);  $^{19}\text{F}$  NMR (564 MHz,  $\text{CDCl}_3$ )  $\delta$  -104.39.

*(4-chlorophenyl)(pyridin-3-yl)methanone (3ae)*<sup>6</sup>

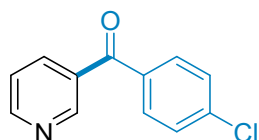

Purification by column chromatography on silica gel (eluting with pentane/ethyl acetate = 5/1, v/v) afforded the title compound as a pale white solid (5.2 mg, 24% yield);  $^1\text{H}$  NMR (600 MHz,  $\text{CDCl}_3$ )  $\delta$  8.91 (s, 1H), 8.77 (s, 1H), 8.05 (d,  $J = 7.2$  Hz, 1H), 7.71 (d,  $J = 8.2$  Hz, 2H), 7.44 – 7.43 (m, 3H);  $^{13}\text{C}\{^1\text{H}\}$  NMR (151 MHz,  $\text{CDCl}_3$ )  $\delta$  193.6, 153.0, 150.7, 140.0, 137.5, 135.1, 133.2, 131.6, 129.2, 123.8.

*(4-bromophenyl)(pyridin-3-yl)methanone (3af)*<sup>9</sup>

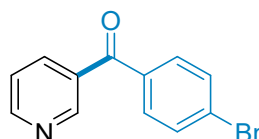

Purification by column chromatography on silica gel (eluting with pentane/ethyl acetate = 5/1, v/v) afforded the title compound as an orange solid (9.4 mg, 36% yield);  $^1\text{H}$  NMR (600 MHz,  $\text{CDCl}_3$ )  $\delta$  8.93 – 8.87 (m, 1H), 8.82 – 8.71 (m, 1H), 8.03 (dt,  $J = 7.9, 1.9$  Hz, 1H), 7.71 – 7.51 (m, 4H), 7.40 (dd,  $J = 7.8, 4.9$  Hz, 1H);  $^{13}\text{C}\{^1\text{H}\}$  NMR (151 MHz,  $\text{CDCl}_3$ )  $\delta$  193.9, 153.2, 150.9, 137.2, 135.5, 132.9, 132.1, 131.6, 128.6, 123.6.

*(3-methoxyphenyl)(pyridin-3-yl)methanone (3ag)*<sup>8</sup>

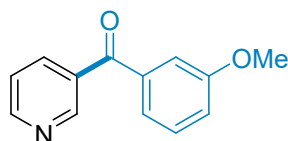

Purification by column chromatography on silica gel (eluting with pentane/ethyl acetate = 3/1, v/v) afforded the title compound as an orange oil (10.2 mg, 48% yield);  $^1\text{H}$  NMR (600 MHz,  $\text{CDCl}_3$ )  $\delta$  8.93 (s, 1H), 8.81 – 8.71 (m, 1H), 8.06 (dt,  $J = 7.8, 1.8$  Hz, 1H), 7.39 (dd,  $J = 7.7, 4.9$  Hz, 1H), 7.34 (t,  $J = 7.9$  Hz, 1H), 7.31 – 7.29 (m, 1H), 7.27 (d,  $J = 7.6$  Hz, 1H), 7.13 – 7.09 (m, 1H);  $^{13}\text{C}\{^1\text{H}\}$  NMR (151 MHz,  $\text{CDCl}_3$ )  $\delta$  194.8, 160.0, 152.9, 151.0, 138.1, 137.4, 133.4, 129.7, 123.5, 123.0, 119.8, 114.3, 55.7.

*(3-fluorophenyl)(pyridin-3-yl)methanone (3ah)*

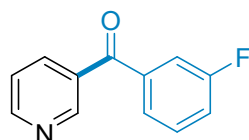

Purification by column chromatography on silica gel (eluting with pentane/ethyl acetate = 5/1, v/v) afforded the title compound as an orange solid (8.2 mg, 41% yield);  $^1\text{H}$  NMR (600 MHz,  $\text{CDCl}_3$ )  $\delta$  8.93 (s, 1H), 8.79 – 8.69 (m, 1H), 8.06 (d,  $J = 7.8$  Hz, 1H), 7.51 (d,  $J = 7.6$  Hz, 1H), 7.48 – 7.40 (m, 3H), 7.28 (td,  $J = 8.2, 2.2$  Hz, 1H);  $^{13}\text{C}\{^1\text{H}\}$  NMR (151 MHz,  $\text{CDCl}_3$ )  $\delta$  193.6, 162.8 (d,  $J_{\text{C-F}} = 248.8$  Hz), 153.2, 150.9, 138.8 (d,  $J_{\text{C-F}} = 6.4$  Hz), 137.4, 132.9, 130.5 (d,  $J_{\text{C-F}} = 7.7$  Hz), 126.0 (d,  $J_{\text{C-F}} = 3.3$  Hz), 123.7, 120.4 (d,  $J_{\text{C-F}} = 21.5$  Hz), 116.8 (d,  $J_{\text{C-F}} = 22.6$  Hz);  $^{19}\text{F}$  NMR (564 MHz,  $\text{CDCl}_3$ )  $\delta$  -

111.18. HRMS (ESI-TOF)  $m/z$   $[M + H]^+$  calcd for  $C_{12}H_9FNO$  202.0663, found 202.0662.

(2-methoxyphenyl)(pyridin-3-yl)methanone (**3ai**)<sup>10</sup>

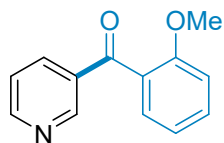

Purification by column chromatography on silica gel (eluting with pentane/ethyl acetate = 4/1, v/v) afforded the title compound as an orange solid (4.9 mg, 23% yield);  $^1H$  NMR (600 MHz,  $CDCl_3$ )  $\delta$  8.94 – 8.81 (m, 1H), 8.78 – 8.62 (m, 1H), 8.09 (d,  $J = 7.6$  Hz, 1H), 7.50 – 7.44 (m, 1H), 7.41 – 7.33 (m, 1H), 7.02 (t,  $J = 7.4$  Hz, 2H), 6.94 (d,  $J = 8.4$  Hz, 1H), 3.64 (s, 1H);  $^{13}C\{^1H\}$  NMR (151 MHz,  $CDCl_3$ )  $\delta$  194.9, 157.7, 152.7, 151.0, 137.0, 133.2, 130.3, 130.2, 128.8, 127.7, 121.1, 111.6, 55.7.

(2-fluorophenyl)(pyridin-3-yl)methanone (**3aj**)

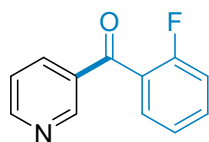

Purification by column chromatography on silica gel (eluting with pentane/ethyl acetate = 5/1, v/v) afforded the title compound as an orange oil (7.2 mg, 36% yield);  $^1H$  NMR (600 MHz,  $CDCl_3$ )  $\delta$  8.92 (s, 1H), 8.74 (d,  $J = 3.8$  Hz, 1H), 8.12 – 8.01 (m, 1H), 7.59 – 7.47 (m, 2H), 7.38 (dd,  $J = 7.9$ , 4.9 Hz, 1H), 7.25 (td,  $J = 7.6$ , 0.8 Hz, 1H), 7.15 – 7.06 (m, 1H);  $^{13}C\{^1H\}$  NMR (151 MHz,  $CDCl_3$ )  $\delta$  192.1, 160.4 (d,  $J_{C-F} = 253.3$  Hz), 153.7, 151.1, 136.8, 134.2 (d,  $J_{C-F} = 8.3$  Hz), 133.2, 131.1 (d,  $J_{C-F} = 2.6$  Hz), 126.1 (d,  $J_{C-F} = 14.1$  Hz), 124.8 (d,  $J_{C-F} = 3.9$  Hz), 123.6, 116.7 (d,  $J_{C-F} = 21.9$  Hz);  $^{19}F$  NMR (564 MHz,  $CDCl_3$ )  $\delta$  -109.78.  $[M + H]^+$  calcd for  $C_{12}H_9FNO$  202.0663, found 202.0661.

pyridin-3-yl(thiophen-2-yl)methanone (**3ak**)<sup>7</sup>

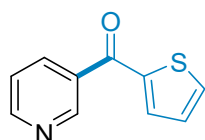

Purification by column chromatography on silica gel (eluting with pentane/ethyl acetate = 5/1, v/v) afforded the title compound as a pale yellow solid (7.6 mg, 40% yield);  $^1H$  NMR (600 MHz,  $CDCl_3$ )  $\delta$  9.06 – 8.95 (m, 1H), 8.85 – 8.70 (m, 1H), 8.09 (dt,  $J = 7.9$ , 1.9 Hz, 1H), 7.72 (dd,  $J = 4.9$ , 0.9 Hz, 1H), 7.59 (dd,  $J = 3.8$ , 0.9 Hz, 1H), 7.40 (dd,  $J = 7.8$ , 4.9 Hz, 1H), 7.14 (dd,  $J = 4.8$ , 3.9 Hz, 1H);  $^{13}C\{^1H\}$  NMR (151 MHz,  $CDCl_3$ )  $\delta$  186.3, 152.9, 150.0, 143.2, 136.7, 135.4, 135.3, 133.94, 128.5, 123.6.

naphthalen-2-yl(pyridin-3-yl)methanone (**3al**)

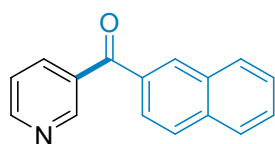

Purification by column chromatography on silica gel (eluting with pentane/ethyl acetate = 5/1, v/v)

afforded the title compound as an orange solid (9.1 mg, 39% yield);  $^1\text{H}$  NMR (600 MHz,  $\text{CDCl}_3$ )  $\delta$  9.00 (s, 1H), 8.86 – 8.68 (m, 1H), 8.20 (s, 1H), 8.11 (d,  $J = 7.8$  Hz, 1H), 7.94 – 7.77 (m, 4H), 7.63 – 7.54 (m, 1H), 7.51 (t,  $J = 7.6$  Hz, 1H), 7.43 (dd,  $J = 7.6, 5.0$  Hz, 1H);  $^{13}\text{C}\{^1\text{H}\}$  NMR (151 MHz,  $\text{CDCl}_3$ )  $\delta$  194.9, 152.9, 151.0, 137.5, 135.7, 134.1, 133.7, 132.4, 132.4, 129.7, 129.0, 128.9, 128.0, 127.2, 125.4, 123.6.  $[\text{M} + \text{H}]^+$  calcd for  $\text{C}_{16}\text{H}_{12}\text{NO}$  234.0914, found 234.0911.

*3-(phenylsulfonyl)pyridine (5aa)*<sup>11</sup>

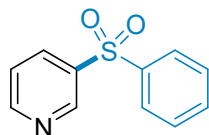

Purification by column chromatography on silica gel (eluting with pentane/ethyl acetate = 5/1, v/v) afforded the title compound as a pale yellow solid (13.6 mg, 62% yield);  $^1\text{H}$  NMR (600 MHz,  $\text{CDCl}_3$ )  $\delta$  9.07 (d,  $J = 1.9$  Hz, 1H), 8.76 – 8.61 (m, 1H), 8.15 (dt,  $J = 8.1, 2.0$  Hz, 1H), 7.99 – 7.82 (m, 2H), 7.63 – 7.51 (m, 1H), 7.48 (t,  $J = 7.7$  Hz, 2H), 7.38 (dd,  $J = 8.0, 4.8$  Hz, 1H);  $^{13}\text{C}\{^1\text{H}\}$  NMR (151 MHz,  $\text{CDCl}_3$ )  $\delta$  153.8, 148.8, 140.9, 138.4, 135.4, 134.0, 129.7, 127.9, 124.0.

*3-tosylpyridine (5ab)*<sup>11</sup>

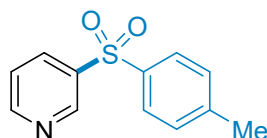

Purification by column chromatography on silica gel (eluting with pentane/ethyl acetate = 5/1, v/v) afforded the title compound as a pale yellow solid (14.9 mg, 67% yield);  $^1\text{H}$  NMR (600 MHz,  $\text{CDCl}_3$ )  $\delta$  9.05 (d,  $J = 2.1$  Hz, 1H), 8.69 (dd,  $J = 4.8, 1.4$  Hz, 1H), 8.13 (dt,  $J = 8.1, 1.9$  Hz, 1H), 7.78 (d,  $J = 8.3$  Hz, 2H), 7.37 (dd,  $J = 8.0, 4.8$  Hz, 1H), 7.26 (d,  $J = 8.1$  Hz, 2H), 2.34 (s, 3H);  $^{13}\text{C}\{^1\text{H}\}$  NMR (151 MHz,  $\text{CDCl}_3$ )  $\delta$  153.6, 148.7, 145.1, 138.8, 137.9, 135.2, 130.3, 128.0, 123.9, 21.8.

*(5-fluoropyridin-3-yl)(phenyl)methanone (3ba)*

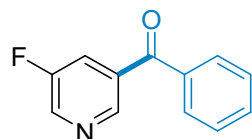

Purification by column chromatography on silica gel (eluting with pentane/ethyl acetate = 5/1, v/v) afforded the title compound as an orange oil (7.0 mg, 35% yield);  $^1\text{H}$  NMR (600 MHz,  $\text{CDCl}_3$ )  $\delta$  8.79 – 8.70 (m, 1H), 8.61 (d,  $J = 2.8$  Hz, 1H), 7.89 – 7.67 (m, 3H), 7.64 – 7.56 (m, 1H), 7.47 (t,  $J = 7.8$  Hz, 1H);  $^{13}\text{C}\{^1\text{H}\}$  NMR (151 MHz,  $\text{CDCl}_3$ )  $\delta$  193.5, 159.3 (d,  $J_{\text{C-F}} = 259.5$  Hz), 146.8 (d,  $J_{\text{C-F}} = 4.3$  Hz), 141.7 (d,  $J_{\text{C-F}} = 23.4$  Hz), 136.5, 134.6 (d,  $J_{\text{C-F}} = 2.7$  Hz), 133.6, 130.1, 128.9, 123.7 (d,  $J_{\text{C-F}} = 18.8$  Hz);  $^{19}\text{F}$  NMR (564 MHz,  $\text{CDCl}_3$ )  $\delta$  -120.37. HRMS (ESI-TOF)  $m/z$   $[\text{M} + \text{H}]^+$  calcd for  $\text{C}_{12}\text{H}_9\text{FNO}^+$  202.0663, found 202.0661.

*(5-iodopyridin-3-yl)(phenyl)methanone (3ca)*

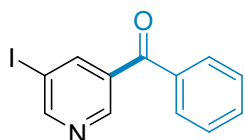

Purification by column chromatography on silica gel (eluting with pentane/ethyl acetate = 5/1, v/v) afforded the title compound as an orange oil (6.8 mg, 22% yield);  $^1\text{H}$  NMR (600 MHz,  $\text{CDCl}_3$ )  $\delta$  8.95 (d,  $J = 2.1$  Hz, 1H), 8.83 (d,  $J = 1.8$  Hz, 1H), 8.36 (t,  $J = 2.0$  Hz, 1H), 7.73 (dd,  $J = 8.3, 1.2$  Hz, 2H), 7.65 – 7.54 (m, 1H), 7.47 (t,  $J = 7.8$  Hz, 2H);  $^{13}\text{C}\{^1\text{H}\}$  NMR (151 MHz,  $\text{CDCl}_3$ )  $\delta$  193.4, 158.8, 149.2, 145.3, 136.4, 134.9, 133.7, 130.1, 128.9, 93.3. HRMS (ESI-TOF)  $m/z$   $[\text{M} + \text{H}]^+$  calcd for  $\text{C}_{12}\text{H}_9^{129}\text{INO}$  309.9724, found 309.9721.

*(5-methylpyridin-3-yl)(phenyl)methanone (3da)*

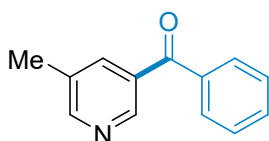

Purification by column chromatography on silica gel (eluting with pentane/ethyl acetate = 5/1, v/v) afforded the title compound as an orange oil (8.1 mg, 41% yield);  $^1\text{H}$  NMR (600 MHz,  $\text{CDCl}_3$ )  $\delta$  8.75 (s, 1H), 8.62 (s, 1H), 7.94 (s, 1H), 7.75 (d,  $J = 7.3$  Hz, 2H), 7.58 (t,  $J = 7.4$  Hz, 1H), 7.46 (t,  $J = 7.6$  Hz, 2H), 2.40 (s, 3H);  $^{13}\text{C}\{^1\text{H}\}$  NMR (151 MHz,  $\text{CDCl}_3$ )  $\delta$  195.2, 153.3, 148.1, 137.8, 137.0, 133.3, 130.9, 130.1, 128.7, 128.2, 18.6. HRMS (ESI-TOF)  $m/z$   $[\text{M} + \text{H}]^+$  calcd for  $\text{C}_{12}\text{H}_{13}\text{NO}$  198.0914, found 198.0913.

*(5-methoxypyridin-3-yl)(phenyl)methanone (3ea)*

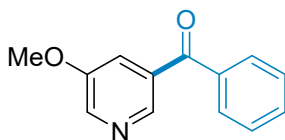

Purification by column chromatography on silica gel (eluting with pentane/ethyl acetate = 4/1, v/v) afforded the mixture compound of **3ea** and (1-methyl-1H-imidazol-2-yl)(phenyl)methanone as an orange oil (2.3 mg, 11% yield, [**3ea** : (1-methyl-1H-imidazol-2-yl)(phenyl)methanone = 34 : 1, determined by  $^1\text{H}$  NMR];  $^1\text{H}$  NMR (600 MHz,  $\text{CDCl}_3$ )  $\delta$  8.48 (s, 1H), 8.45 (d,  $J = 2.4$  Hz, 1H), 7.78 – 7.71 (m, 2H), 7.59 – 7.54 (m, 3H), 7.45 (t,  $J = 7.8$  Hz, 2H), 3.86 (s, 3H);  $^{13}\text{C}\{^1\text{H}\}$  NMR (151 MHz,  $\text{CDCl}_3$ )  $\delta$  194.9, 143.3, 141.9, 137.0, 133.3, 130.9, 130.2, 128.7, 128.2, 120.2, 56.0.  $^1\text{H}$  NMR data for (1-methyl-1H-imidazol-2-yl)(phenyl)methanone:  $^1\text{H}$  NMR (600 MHz,  $\text{CDCl}_3$ )  $\delta$  8.22 – 8.13 (m, 2H), 7.53 – 7.48 (m, 1H), 7.42 (t,  $J = 7.7$  Hz, 2H), 7.17 (s, 1H), 7.05 (s, 1H), 4.02 (s, 3H). HRMS (ESI-TOF)  $m/z$   $[\text{M} + \text{H}]^+$  calcd for  $\text{C}_{13}\text{H}_{12}\text{NO}_2$  214.0863, found 214.0860.

*(5-benzylpyridin-3-yl)(phenyl)methanone (3fa)*

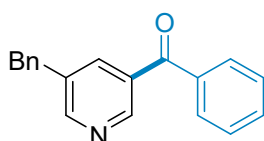

Purification by column chromatography on silica gel (eluting with pentane/ethyl acetate = 5/1, v/v)

afforded the title compound as an orange oil (10.9 mg, 40% yield);  $^1\text{H}$  NMR (600 MHz,  $\text{CDCl}_3$ )  $\delta$  8.76 (s, 1H), 8.63 (s, 1H), 7.87 (s, 1H), 7.70 (d,  $J = 7.3$  Hz, 2H), 7.54 (t,  $J = 7.4$  Hz, 1H), 7.41 (t,  $J = 7.7$  Hz, 2H), 7.24 (t,  $J = 7.5$  Hz, 2H), 7.16 (t,  $J = 7.4$  Hz, 1H), 7.12 (d,  $J = 7.3$  Hz, 2H), 4.00 (s, 2H);  $^{13}\text{C}\{^1\text{H}\}$  NMR (151 MHz,  $\text{CDCl}_3$ )  $\delta$  195.0, 153.2, 148.9, 139.2, 137.5, 136.9, 133.3, 130.1, 129.00, 128.97, 128.7, 126.9, 39.1. HRMS (ESI-TOF)  $m/z$   $[\text{M} + \text{H}]^+$  calcd for  $\text{C}_{19}\text{H}_{16}\text{NO}$  274.1227, found 274.1225.

*phenyl(5-phenylpyridin-3-yl)methanone (3ga)*

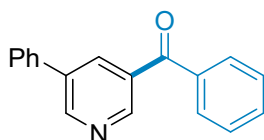

Purification by column chromatography on silica gel (eluting with pentane/ethyl acetate = 5/1, v/v) afforded the title compound as an orange oil (8.5 mg, 33% yield);  $^1\text{H}$  NMR (600 MHz,  $\text{CDCl}_3$ )  $\delta$  8.89 (s, 1H), 8.24 (s, 1H), 7.84 – 7.70 (m, 2H), 7.62 – 7.53 (m, 3H), 7.46 (dt,  $J = 15.3, 7.8$  Hz, 4H), 7.38 (t,  $J = 7.4$  Hz, 1H);  $^{13}\text{C}\{^1\text{H}\}$  NMR (151 MHz,  $\text{CDCl}_3$ )  $\delta$  195.0, 151.2, 149.4, 136.9, 136.8, 135.6, 133.4, 130.2, 129.4, 128.8, 128.8, 127.4. HRMS (ESI-TOF)  $m/z$   $[\text{M} + \text{H}]^+$  calcd for  $\text{C}_{18}\text{H}_{14}\text{N}_2\text{O}$  260.1070, found 260.1066.

*[2,3'-bipyridin]-5'-yl(phenyl)methanone (3ha)*

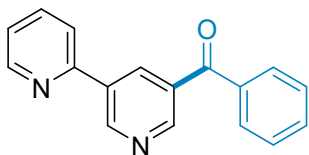

Purification by column chromatography on silica gel (eluting with pentane/ethyl acetate = 3/1, v/v) afforded the title compound as an orange oil (11.2 mg, 43% yield);  $^1\text{H}$  NMR (600 MHz,  $\text{CDCl}_3$ )  $\delta$  9.36 (s, 1H), 8.96 (s, 1H), 8.77 – 8.55 (m, 2H), 7.82 – 7.74 (m, 4H), 7.63 – 7.57 (m, 1H), 7.47 (t,  $J = 7.8$  Hz, 2H), 7.27 (ddd,  $J = 6.7, 4.8, 2.0$  Hz, 1H);  $^{13}\text{C}\{^1\text{H}\}$  NMR (151 MHz,  $\text{CDCl}_3$ )  $\delta$  194.9, 153.9, 151.2, 150.8, 150.4, 137.3, 136.9, 135.5, 133.4, 130.2, 128.8, 123.5, 121.0. HRMS (ESI-TOF)  $m/z$   $[\text{M} + \text{H}]^+$  calcd for  $\text{C}_{17}\text{H}_{13}\text{N}_2\text{O}$  261.1023, found 261.1019.

*(4-methylpyridin-3-yl)(phenyl)methanone (3ia)<sup>12</sup>*

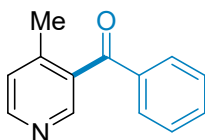

Purification by column chromatography on silica gel (eluting with pentane/ethyl acetate = 5/1, v/v) afforded the title compound as a deep red oil (7.7 mg, 39% yield);  $^1\text{H}$  NMR (600 MHz,  $\text{CDCl}_3$ )  $\delta$  8.53 (d,  $J = 4.3$  Hz, 1H), 8.50 (s, 1H), 7.73 (d,  $J = 8.3$  Hz, 2H), 7.56 (t,  $J = 7.4$  Hz, 1H), 7.42 (t,  $J = 7.8$  Hz, 2H), 7.19 (d,  $J = 5.1$  Hz, 1H);  $^{13}\text{C}\{^1\text{H}\}$  NMR (151 MHz,  $\text{CDCl}_3$ )  $\delta$  196.4, 151.0, 149.2, 146.8, 137.4, 133.9, 130.2, 128.7, 126.2, 19.8.

*(4-ethylpyridin-3-yl)(phenyl)methanone (3ja)*

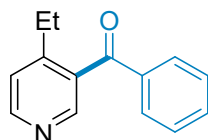

Purification by column chromatography on silica gel (eluting with pentane/ethyl acetate = 5/1, v/v) afforded the title compound as a deep red oil (6.5 mg, 31% yield);  $^1\text{H}$  NMR (600 MHz,  $\text{CDCl}_3$ )  $\delta$  8.68 – 8.54 (m, 1H), 8.51 – 8.35 (m, 1H), 7.74 (d,  $J = 7.3$  Hz, 2H), 7.57 (t,  $J = 7.4$  Hz, 1H), 7.43 (t,  $J = 7.7$  Hz, 2H), 7.31 – 7.25 (m, 1H), 2.66 (q,  $J = 7.4$  Hz, 2H), 1.14 (t,  $J = 7.6$  Hz, 3H);  $^{13}\text{C}\{^1\text{H}\}$  NMR (151 MHz,  $\text{CDCl}_3$ )  $\delta$  196.2, 153.5, 150.5, 148.3, 137.3, 134.1, 130.3, 129.1, 128.9, 124.6, 26.2, 14.8. HRMS (ESI-TOF)  $m/z$   $[\text{M} + \text{H}]^+$  calcd for  $\text{C}_{14}\text{H}_{14}\text{NO}$  212.1070, found 212.1067.

*phenyl(5,6,7,8-tetrahydroisoquinolin-4-yl)methanone (3ma)*

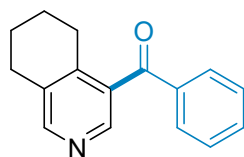

Purification by column chromatography on silica gel (eluting with pentane/ethyl acetate = 5/1, v/v) afforded the title compound as a pale yellow oil (3.6 mg, 15% yield);  $^1\text{H}$  NMR (600 MHz,  $\text{CDCl}_3$ )  $\delta$  8.35 (s, 1H), 8.24 (s, 1H), 7.78 – 7.68 (m, 2H), 7.55 (t,  $J = 7.4$  Hz, 1H), 7.41 (t,  $J = 7.8$  Hz, 2H), 2.77 (t,  $J = 6.3$  Hz, 2H), 2.68 (t,  $J = 6.3$  Hz, 2H), 1.83 – 1.73 (m, 2H), 1.72 – 1.68 (m, 2H);  $^{13}\text{C}\{^1\text{H}\}$  NMR (151 MHz,  $\text{CDCl}_3$ )  $\delta$  196.8, 151.9, 146.0, 145.5, 137.4, 133.8, 130.9, 130.2, 128.8, 128.2, 26.8, 26.7, 22.3, 22.2. HRMS (ESI-TOF)  $m/z$   $[\text{M} + \text{H}]^+$  calcd for  $\text{C}_{16}\text{H}_{16}\text{NO}$  238.1227, found 238.1223.

*2-(5-benzoylpyridin-3-yl)-2-methyl-1-(pyridin-3-yl)propan-1-one (3na)*

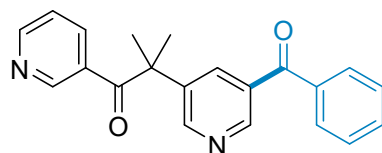

Purification by column chromatography on silica gel (eluting with pentane/ethyl acetate = 4/1, v/v) afforded the title compound as an orange solid (8.9 mg, 27% yield);  $^1\text{H}$  NMR (600 MHz,  $\text{CDCl}_3$ )  $\delta$  8.83 (d,  $J = 1.8$  Hz, 1H), 8.70 (d,  $J = 2.3$  Hz, 1H), 8.65 (d,  $J = 1.9$  Hz, 1H), 8.57 (dd,  $J = 4.8, 1.5$  Hz, 1H), 7.97 (t,  $J = 2.1$  Hz, 1H), 7.80 (dt,  $J = 8.0, 1.8$  Hz, 1H), 7.64 (d,  $J = 7.3$  Hz, 2H), 7.56 (t,  $J = 7.4$  Hz, 1H), 7.41 (t,  $J = 7.8$  Hz, 2H), 7.22 (dd,  $J = 8.0, 4.8$  Hz, 1H), 1.66 (s, 6H);  $^{13}\text{C}\{^1\text{H}\}$  NMR (151 MHz,  $\text{CDCl}_3$ )  $\delta$  200.7, 194.5, 152.7, 151.0, 150.7, 149.7, 140.4, 137.2, 136.6, 134.5, 133.5, 133.4, 130.8, 130.1, 128.8, 123.5, 50.5, 27.6. HRMS (ESI-TOF)  $m/z$   $[\text{M} + \text{H}]^+$  calcd for  $\text{C}_{21}\text{H}_{19}\text{N}_2\text{O}_2$  331.1442, found 331.1432.

### 13. Computational Study

Density functional theory (DFT) calculations were performed using Gaussian 16 rev. A.03 software<sup>13</sup>, using the hybrid exchange-correlation functional B3LYP<sup>14-16</sup>. Grimme's D3 empirical dispersion correction with Becke–Johnson damping (GD3BJ)<sup>17,18</sup> was included to account for dispersion interactions. The Karlsruhe-family basis set def2-SVP<sup>19</sup> were used for all the gas-phase optimizations. Minima and transition structures on the potential energy surface (PES) were confirmed as such by harmonic frequency analysis, showing respectively zero and one imaginary

frequency. Intrinsic reaction coordinate (IRC) analyses were performed to confirm that the found TSs connect to the right reactants and products. To improve on the accuracy of the corrected Gibbs energy profile, single point (SP) calculations were performed at B3LYP-GD3(BJ) level with def2-TZVP basis set<sup>19</sup>. The implicit SMD continuum solvation model<sup>20</sup> for acetonitrile solvent is used to account for the effect of solvent on the potential energy surface.

Time-dependent density functional theory (TD-DFT) calculations were performed at TD-B3LYP-GD3(BJ)/def2-SVP level based on the optimized structure. The calculations of spin-orbit coupling (SOC) between triplets and singlets were carried out at B3LYP-D3/def2-TZVP level utilizing orca 6.1.0<sup>21</sup>. SOC provides the relativistic coupling between electronic states of different spin multiplicities and is therefore a key factor governing spin-forbidden intersystem crossing (ISC) from singlet to triplet excited states. In general, a larger SOC matrix element indicates stronger singlet–triplet coupling and thus a higher probability of ISC, while the singlet–triplet energy gap also affects the ISC efficiency. Therefore, the calculated SOC matrix elements were used here as qualitative theoretical descriptors to evaluate the relative propensity for singlet–triplet intersystem crossing in the present system. This treatment is consistent with recent computational analyses<sup>22</sup> in which SOC matrix elements and singlet–triplet energy gaps were used to rationalize enhanced ISC and triplet-state accessibility in photoactive systems. Molecular orbital localization (MOL) analysis was performed with Multiwfn 3.8 (dev)<sup>23</sup> and the VMD 1.9.3<sup>24</sup> were used to visualize the frontier molecular orbitals.

**Table S6.** The singlet excited state transition configurations of **1a** according to TD-DFT calculations. % Constitution for each orbitals pair is in parentheses.

| Singlet excite state | Energy (kcal/mol) | Wavelength (nm) | Oscillator Strength ( <i>f</i> ) | Transition configuration                                                                                |
|----------------------|-------------------|-----------------|----------------------------------|---------------------------------------------------------------------------------------------------------|
| S <sub>1</sub>       | 78.9              | 362             | 0.308                            | HOMO → LUMO (99.2%)                                                                                     |
| S <sub>2</sub>       | 98.0              | 292             | 0.027                            | HOMO → LUMO + 1 (86.5%)<br>HOMO - 1 → LUMO (10.5%)                                                      |
| S <sub>3</sub>       | 107.9             | 265             | 0.089                            | HOMO - 1 → LUMO (65.3%)<br>HOMO → LUMO + 2 (22.7%)                                                      |
| S <sub>4</sub>       | 113.5             | 252             | 0.001                            | HOMO - 2 → LUMO (38.8%)<br>HOMO - 3 → LUMO (26.8%)<br>HOMO - 4 → LUMO (20.4%)<br>HOMO → LUMO + 2 (5.9%) |

**Table S7.** Calculated spin-orbital coupling constant of **1a**.

| SOC (cm <sup>-1</sup> )         |                                 |                                 |                                 |
|---------------------------------|---------------------------------|---------------------------------|---------------------------------|
| S <sub>0</sub> , T <sub>1</sub> | S <sub>0</sub> , T <sub>2</sub> | S <sub>1</sub> , T <sub>1</sub> | S <sub>1</sub> , T <sub>2</sub> |
| 1.380                           | 3.080                           | 2.235                           | 2.685                           |

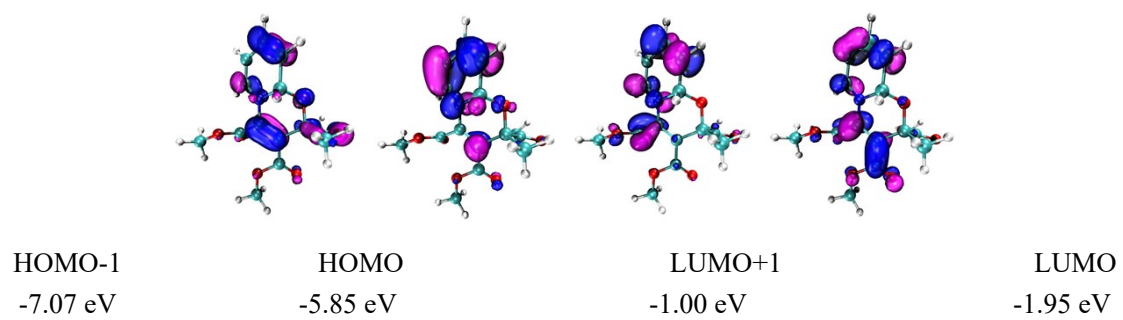

**Figure S10.** Frontier molecular orbitals of **1a**.

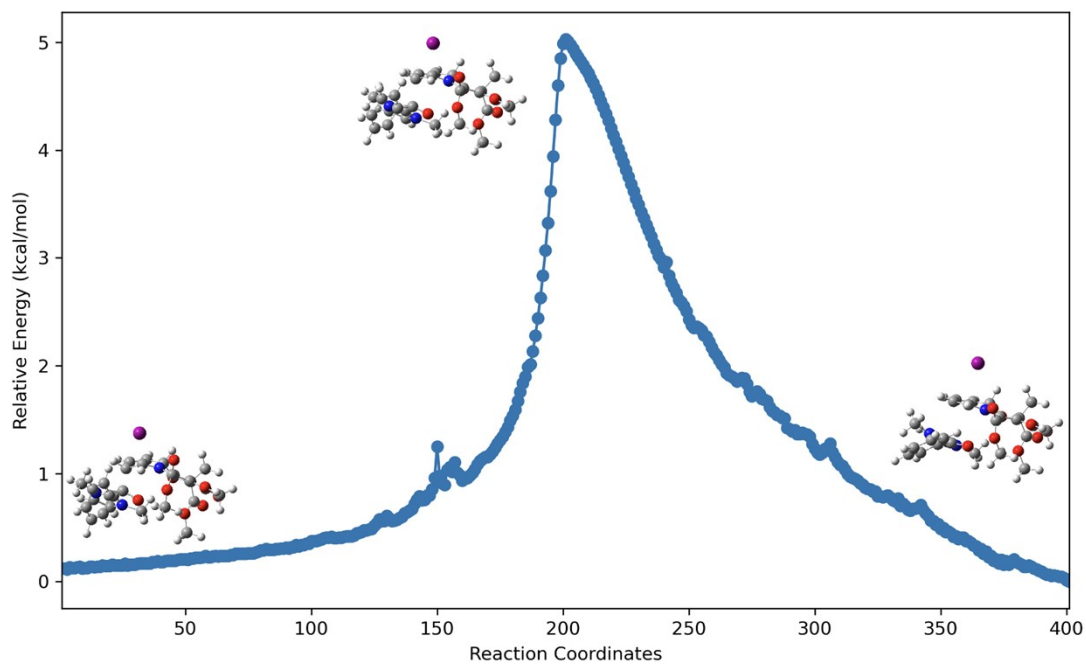

**Figure S11.** Intrinsic reaction coordinate of **TS-1**.

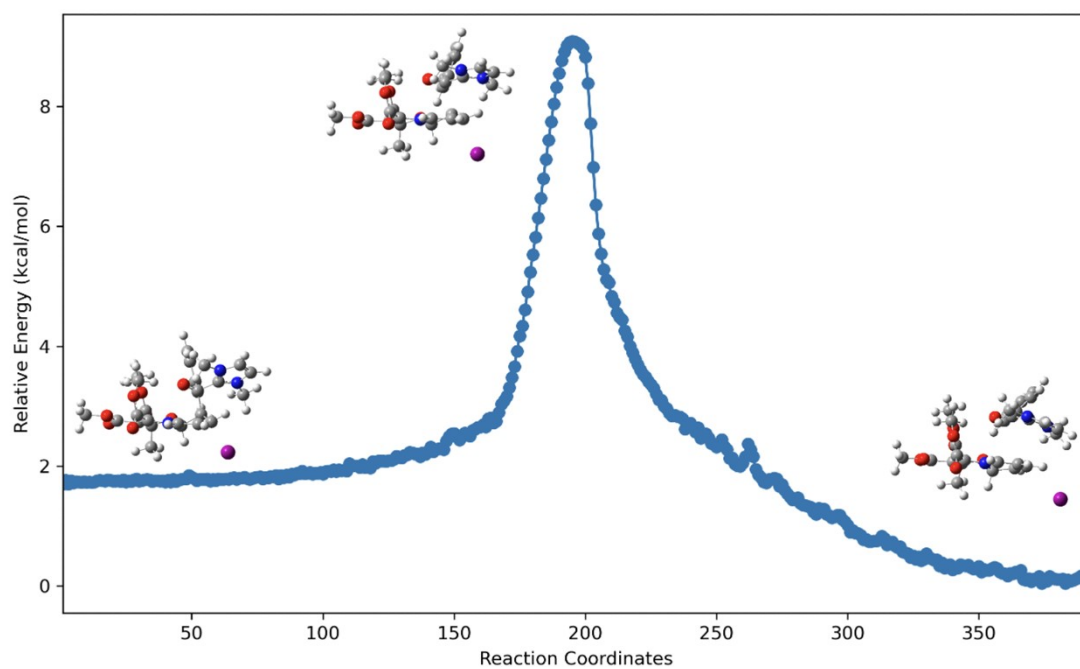

Figure S12. Intrinsic reaction coordinate of TS-1'.

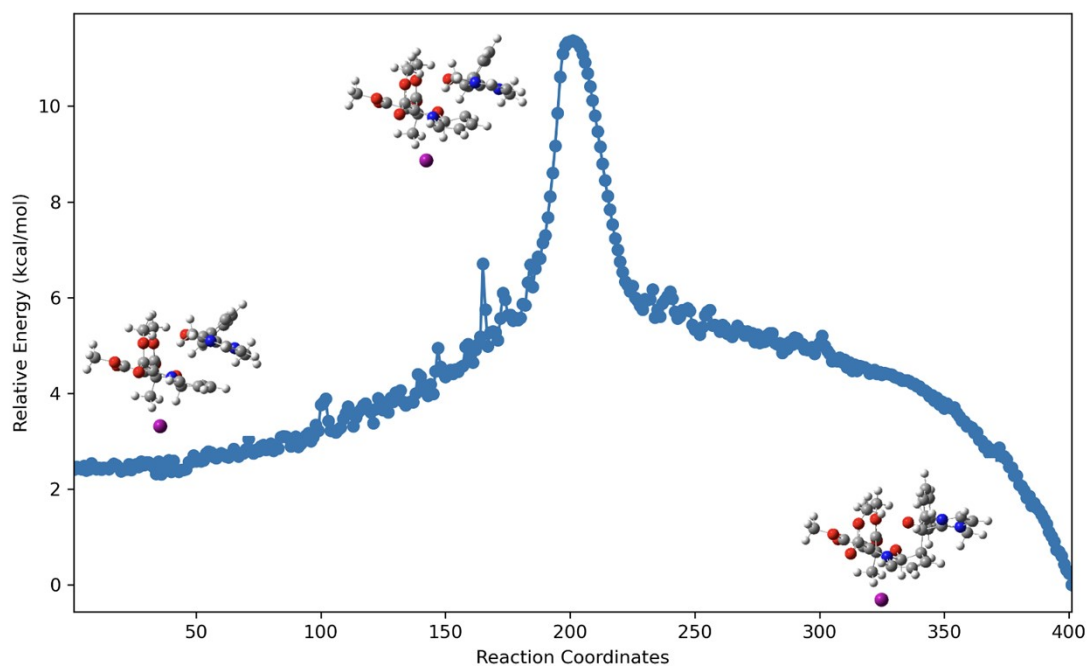

Figure S13. Intrinsic reaction coordinate of TS-1''.

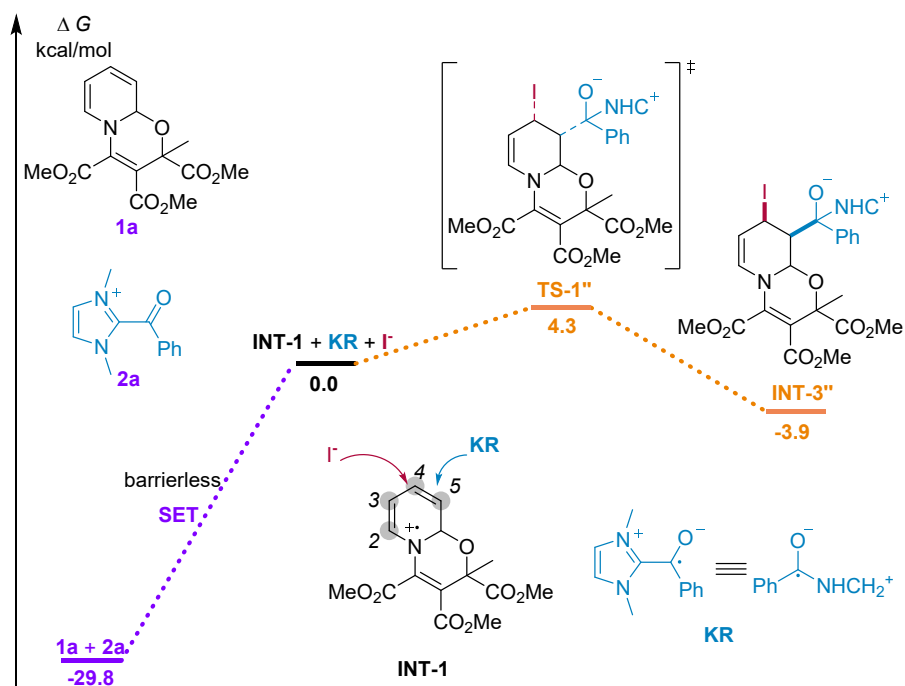

Figure S14. Pathway C: iodide attack at C4 and the barrierless SET process

#### Cartesian coordinate

#### NHC

|                                          |                             |
|------------------------------------------|-----------------------------|
| Zero-point correction=                   | 0.126265 (Hartree/Particle) |
| Thermal correction to Energy=            | 0.133244                    |
| Thermal correction to Enthalpy=          | 0.134188                    |
| Thermal correction to Gibbs Free Energy= | 0.095301                    |

|                                              |             |             |             |
|----------------------------------------------|-------------|-------------|-------------|
| Sum of electronic and zero-point Energies=   |             |             | -304.470999 |
| Sum of electronic and thermal Energies=      |             |             | -304.464019 |
| Sum of electronic and thermal Enthalpies=    |             |             | -304.463075 |
| Sum of electronic and thermal Free Energies= |             |             | -304.501963 |
| C                                            | 0.00005000  | -0.98185300 | -0.00024800 |
| N                                            | 1.06347300  | -0.12289400 | -0.00050500 |
| C                                            | 0.68024500  | 1.21332800  | -0.00017100 |
| C                                            | -0.68034500 | 1.21333600  | 0.00025400  |
| N                                            | -1.06348000 | -0.12282600 | 0.00013200  |
| C                                            | 2.44163600  | -0.57045800 | 0.00023800  |
| C                                            | -2.44157000 | -0.57053400 | 0.00006700  |
| H                                            | 1.38957200  | 2.03755200  | 0.00027100  |
| H                                            | -1.38961700 | 2.03763700  | -0.00030500 |
| H                                            | 2.43534500  | -1.66687400 | 0.00014800  |
| H                                            | 2.97511400  | -0.21069500 | -0.89460300 |
| H                                            | 2.97404400  | -0.21135600 | 0.89605600  |
| H                                            | -2.97466000 | -0.21053200 | 0.89505500  |
| H                                            | -2.97430700 | -0.21164600 | -0.89558600 |
| H                                            | -2.43553500 | -1.66696400 | 0.00074500  |

#### INT-1

|                                              |             |             |                             |
|----------------------------------------------|-------------|-------------|-----------------------------|
| Zero-point correction=                       |             |             | 0.311728 (Hartree/Particle) |
| Thermal correction to Energy=                |             |             | 0.334566                    |
| Thermal correction to Enthalpy=              |             |             | 0.335510                    |
| Thermal correction to Gibbs Free Energy=     |             |             | 0.258367                    |
| Sum of electronic and zero-point Energies=   |             |             | -1161.763903                |
| Sum of electronic and thermal Energies=      |             |             | -1161.741065                |
| Sum of electronic and thermal Enthalpies=    |             |             | -1161.740120                |
| Sum of electronic and thermal Free Energies= |             |             | -1161.817264                |
| C                                            | -3.52193300 | -1.58067500 | 0.69190100                  |
| C                                            | -2.63796200 | -0.49873900 | 0.74531400                  |
| N                                            | -1.57514700 | -0.42106000 | -0.05900900                 |
| C                                            | -1.22411100 | -1.51830600 | -1.01516900                 |
| C                                            | -2.19263700 | -2.65457000 | -1.00038000                 |
| C                                            | -3.29342200 | -2.66338100 | -0.19588700                 |
| C                                            | -0.64572200 | 0.63330500  | -0.09446700                 |
| C                                            | 0.60766500  | 0.36992700  | -0.55956600                 |
| C                                            | 1.10633300  | -1.04514200 | -0.76947900                 |
| O                                            | 0.03397000  | -1.99852100 | -0.69337500                 |
| C                                            | 1.88810800  | -1.24727500 | -2.06355500                 |
| C                                            | -1.02798800 | 2.04859900  | 0.23257300                  |
| O                                            | -0.19150900 | 2.90589900  | 0.36907200                  |
| O                                            | -2.34105200 | 2.23869900  | 0.31888800                  |
| C                                            | -2.77944400 | 3.59616600  | 0.55282700                  |
| C                                            | 1.51649800  | 1.47231800  | -1.07702700                 |

|   |             |             |             |
|---|-------------|-------------|-------------|
| O | 1.32353300  | 1.76906500  | -2.22772800 |
| O | 2.51895500  | 1.93310200  | -0.36516300 |
| C | 2.60954000  | 1.77587000  | 1.05332500  |
| C | 2.01470200  | -1.35659000 | 0.46189900  |
| O | 3.20902800  | -1.43778100 | 0.39449700  |
| O | 1.28770900  | -1.47236400 | 1.57033800  |
| C | 2.01154400  | -1.79103800 | 2.77387300  |
| H | -4.37635200 | -1.58161200 | 1.36994600  |
| H | -2.79012400 | 0.32391400  | 1.44141100  |
| H | -1.22857900 | -1.03274300 | -2.01346100 |
| H | -1.94712700 | -3.48417900 | -1.66673400 |
| H | -3.98503200 | -3.50776900 | -0.21176500 |
| H | 1.28718500  | -0.94192700 | -2.93020500 |
| H | 2.81344700  | -0.65849300 | -2.05052900 |
| H | 2.15633200  | -2.30846200 | -2.14463000 |
| H | -3.87249900 | 3.55142300  | 0.59753500  |
| H | -2.35980300 | 3.96991500  | 1.49660400  |
| H | -2.44715500 | 4.23982900  | -0.27269900 |
| H | 3.56855600  | 1.29097900  | 1.27517500  |
| H | 2.56899600  | 2.77621900  | 1.50264600  |
| H | 1.78171100  | 1.17178900  | 1.44970700  |
| H | 1.25971500  | -1.86541700 | 3.56688600  |
| H | 2.54462500  | -2.74410700 | 2.65362800  |
| H | 2.74003500  | -0.99954000 | 3.00022400  |

## INT-2

|                                              |             |             |                             |
|----------------------------------------------|-------------|-------------|-----------------------------|
| Zero-point correction=                       |             |             | 0.545201 (Hartree/Particle) |
| Thermal correction to Energy=                |             |             | 0.585001                    |
| Thermal correction to Enthalpy=              |             |             | 0.585945                    |
| Thermal correction to Gibbs Free Energy=     |             |             | 0.468476                    |
| Sum of electronic and zero-point Energies=   |             |             | -2109.006077                |
| Sum of electronic and thermal Energies=      |             |             | -2108.966277                |
| Sum of electronic and thermal Enthalpies=    |             |             | -2108.965333                |
| Sum of electronic and thermal Free Energies= |             |             | -2109.082802                |
| C                                            | -1.38637200 | 2.10159300  | -0.02475300                 |
| C                                            | -0.53975800 | 1.33804300  | 0.71394700                  |
| N                                            | 0.47432300  | 0.60737100  | 0.13317600                  |
| C                                            | 0.92109500  | 0.95566900  | -1.23566600                 |
| C                                            | -0.17363900 | 1.56964000  | -2.04908200                 |
| C                                            | -1.22311600 | 2.16807000  | -1.46172400                 |
| C                                            | 1.31325700  | -0.24191900 | 0.82272700                  |
| C                                            | 2.38095000  | -0.83375100 | 0.20724300                  |
| C                                            | 2.57811100  | -0.74169400 | -1.29602100                 |
| O                                            | 1.38725300  | -0.20029200 | -1.88760300                 |
| C                                            | -2.52851900 | -1.02026800 | -0.08200400                 |

|   |             |             |             |
|---|-------------|-------------|-------------|
| C | -2.89999500 | -0.51136800 | -1.42330500 |
| C | -3.49849200 | -0.98776800 | 1.04072900  |
| O | -1.42807800 | -1.56096700 | 0.03209300  |
| C | -2.99576900 | -0.92379900 | 2.35388600  |
| C | -3.86827100 | -0.95548800 | 3.43877200  |
| C | -5.24739400 | -1.08521500 | 3.23241400  |
| C | -5.75006700 | -1.19809200 | 1.93262700  |
| C | -4.88096000 | -1.14991100 | 0.84218100  |
| N | -2.30347200 | -0.95207300 | -2.56431900 |
| C | -2.83331000 | -0.28213000 | -3.64124300 |
| C | -3.76801400 | 0.58958900  | -3.16369400 |
| N | -3.80571100 | 0.44246100  | -1.79304900 |
| C | -1.23921000 | -1.95625500 | -2.67447500 |
| C | -4.54202200 | 1.34831700  | -0.91800200 |
| C | 0.96283700  | -0.45468800 | 2.29150100  |
| O | 1.03546800  | 0.43632300  | 3.09121200  |
| O | 0.40812500  | -1.62784700 | 2.64412100  |
| C | 0.48230600  | -2.83164900 | 1.88081100  |
| C | 3.35412600  | -1.67242300 | 0.91085700  |
| O | 4.17377700  | -2.37534000 | 0.35011700  |
| O | 3.25838600  | -1.59689600 | 2.25159000  |
| C | 4.15170700  | -2.40427000 | 3.01180300  |
| C | 2.64193000  | -2.15594700 | -1.91854800 |
| O | 3.36136800  | -2.47864900 | -2.82371200 |
| O | 1.71880900  | -2.97560600 | -1.37595300 |
| C | 1.73188200  | -4.31957000 | -1.84943800 |
| H | -2.11324300 | 2.72530200  | 0.49233700  |
| H | 1.74056000  | 1.69372100  | -1.10913600 |
| H | 0.00872800  | 1.61114800  | -3.12417300 |
| H | -1.94916700 | 2.71944300  | -2.06351600 |
| H | -1.91896000 | -0.85670100 | 2.51121900  |
| H | -3.46951900 | -0.88401800 | 4.45296100  |
| H | -5.92853000 | -1.11310600 | 4.08593100  |
| H | -6.82140300 | -1.33570500 | 1.76900100  |
| H | -5.27743200 | -1.27573500 | -0.16791300 |
| H | -2.49588700 | -0.47044300 | -4.65575400 |
| H | -4.38841400 | 1.31585800  | -3.67991100 |
| H | -0.29851700 | -1.54736500 | -2.28642200 |
| H | -1.50635300 | -2.84929700 | -2.09959900 |
| H | -1.13938700 | -2.20911400 | -3.73740300 |
| H | -4.00028100 | 1.45220000  | 0.02727400  |
| H | -4.59783700 | 2.32848400  | -1.40867700 |
| H | -5.55491700 | 0.97635300  | -0.71780300 |
| H | 1.31604000  | -3.44008900 | 2.26247300  |

|   |             |             |             |
|---|-------------|-------------|-------------|
| H | -0.46555900 | -3.36068100 | 2.04147700  |
| H | 0.60985100  | -2.64545300 | 0.81043300  |
| H | 3.91143400  | -2.21144000 | 4.06390300  |
| H | 4.01515800  | -3.47021600 | 2.77254800  |
| H | 5.19530300  | -2.13039100 | 2.79879400  |
| H | 0.92874700  | -4.84109500 | -1.31369400 |
| H | 1.55854000  | -4.35657000 | -2.93561100 |
| H | 2.70300700  | -4.78947100 | -1.63416900 |
| C | 3.81379700  | 0.05393500  | -1.70719200 |
| H | 3.89271000  | 0.06607200  | -2.80238100 |
| H | 3.75260200  | 1.08101800  | -1.32241400 |
| H | 4.71363800  | -0.42325800 | -1.29806500 |
| H | -0.62313900 | 1.26963600  | 1.79519400  |
| I | 1.59590300  | 4.13073300  | 0.42229100  |

### INT-2'

Zero-point correction= 0.545271 (Hartree/Particle)

|                                              |              |             |             |
|----------------------------------------------|--------------|-------------|-------------|
| Thermal correction to Energy=                | 0.584783     |             |             |
| Thermal correction to Enthalpy=              | 0.585727     |             |             |
| Thermal correction to Gibbs Free Energy=     | 0.469825     |             |             |
| Sum of electronic and zero-point Energies=   | -2109.006500 |             |             |
| Sum of electronic and thermal Energies=      | -2108.966988 |             |             |
| Sum of electronic and thermal Enthalpies=    | -2108.966044 |             |             |
| Sum of electronic and thermal Free Energies= | -2109.081946 |             |             |
| C                                            | -1.82601400  | 1.24734800  | -1.13529100 |
| C                                            | -0.79408900  | 1.28009100  | -0.23268800 |
| N                                            | 0.32381200   | 0.49147500  | -0.41256100 |
| C                                            | 0.71064400   | 0.17711800  | -1.80856400 |
| C                                            | -0.48576400  | -0.02099000 | -2.68818900 |
| C                                            | -1.67527000  | 0.52445900  | -2.37291900 |
| C                                            | 1.31860700   | 0.31267500  | 0.53266400  |
| C                                            | 2.52618300   | -0.22418300 | 0.18088800  |
| C                                            | 2.73983300   | -0.87339400 | -1.17491500 |
| O                                            | 1.47449100   | -0.99509100 | -1.83574600 |
| C                                            | -2.30603100  | -1.10450800 | 0.83794700  |
| C                                            | -3.33610600  | -0.10789900 | 1.21894500  |
| C                                            | -2.57214300  | -2.16621300 | -0.15957900 |
| C                                            | -1.48058800  | -2.63386700 | -0.91737500 |
| C                                            | -1.66051700  | -3.67301500 | -1.82852400 |
| C                                            | -2.91226400  | -4.28081200 | -1.97015400 |
| C                                            | -3.99006300  | -3.85150500 | -1.18652300 |
| C                                            | -3.82144900  | -2.79948000 | -0.28762000 |
| N                                            | -3.28780700  | 0.58464900  | 2.39504500  |
| C                                            | -4.35516900  | 1.45419400  | 2.45527400  |
| C                                            | -5.08562100  | 1.28839300  | 1.31751200  |

|   |             |             |             |
|---|-------------|-------------|-------------|
| N | -4.46199200 | 0.31524800  | 0.56294800  |
| C | -2.28087600 | 0.49638900  | 3.45962700  |
| C | -4.85425200 | 0.02392900  | -0.81071700 |
| C | 0.96730000  | 0.67964800  | 1.97039100  |
| O | 0.53679800  | 1.76588100  | 2.27292800  |
| O | 1.06161800  | -0.26004400 | 2.91688500  |
| C | 1.37553600  | -1.63165700 | 2.68643000  |
| C | 3.67840700  | -0.28571700 | 1.08846500  |
| O | 4.62437600  | -1.03480900 | 0.93391200  |
| O | 3.60136000  | 0.59385500  | 2.10236000  |
| C | 4.63740100  | 0.54671300  | 3.07723700  |
| C | 3.15159200  | -2.35583600 | -1.00580600 |
| O | 3.97584200  | -2.91860000 | -1.67310200 |
| O | 2.40004600  | -2.96767500 | -0.07408500 |
| C | 2.68513200  | -4.34683600 | 0.14505200  |
| H | -2.66669500 | 1.92023800  | -0.97467600 |
| H | 1.30588800  | 1.04850100  | -2.15599200 |
| H | -0.30450200 | -0.57134000 | -3.61214000 |
| H | -2.52013400 | 0.43409100  | -3.06023300 |
| H | -0.49818700 | -2.17965900 | -0.79533200 |
| H | -0.81270100 | -4.01020700 | -2.42905600 |
| H | -3.04692900 | -5.10004600 | -2.68031700 |
| H | -4.95960500 | -4.34836300 | -1.26827800 |
| H | -4.65604900 | -2.49370500 | 0.34718800  |
| H | -4.50459100 | 2.11797400  | 3.30128700  |
| H | -5.98533600 | 1.79008800  | 0.97426100  |
| H | -1.97508400 | -0.54283700 | 3.60306200  |
| H | -1.38943200 | 1.08777800  | 3.20540800  |
| H | -2.74184500 | 0.88729400  | 4.37555900  |
| H | -5.62478900 | -0.75727400 | -0.84737200 |
| H | -5.24320600 | 0.94658300  | -1.26093400 |
| H | -3.97970500 | -0.30993600 | -1.37474200 |
| H | 2.45957300  | -1.79651300 | 2.77266200  |
| H | 0.86372500  | -2.19301000 | 3.47978100  |
| H | 1.02652700  | -1.97652000 | 1.70964100  |
| H | 4.39736300  | 1.32456900  | 3.81140000  |
| H | 4.67339600  | -0.44105500 | 3.56293900  |
| H | 5.61501900  | 0.74210100  | 2.61284900  |
| H | 1.98216100  | -4.68595000 | 0.91604000  |
| H | 2.54720200  | -4.92654300 | -0.77981400 |
| H | 3.72298300  | -4.47330500 | 0.48756800  |
| C | 3.76158300  | -0.15286900 | -2.04964300 |
| H | 3.86032600  | -0.68204700 | -3.00656100 |
| H | 3.45054700  | 0.88639600  | -2.22293600 |

|   |             |             |             |
|---|-------------|-------------|-------------|
| H | 4.74043500  | -0.14947800 | -1.55272000 |
| H | -0.85230400 | 1.82098600  | 0.70498700  |
| I | 0.50662800  | 3.90325800  | -1.32839900 |
| O | -1.23070700 | -1.07278600 | 1.44335100  |

### TS-1

|                                              |             |             |                             |
|----------------------------------------------|-------------|-------------|-----------------------------|
| Zero-point correction=                       |             |             | 0.544989 (Hartree/Particle) |
| Thermal correction to Energy=                |             |             | 0.583464                    |
| Thermal correction to Enthalpy=              |             |             | 0.584408                    |
| Thermal correction to Gibbs Free Energy=     |             |             | 0.472349                    |
| Sum of electronic and zero-point Energies=   |             |             | -2108.997377                |
| Sum of electronic and thermal Energies=      |             |             | -2108.958903                |
| Sum of electronic and thermal Enthalpies=    |             |             | -2108.957959                |
| Sum of electronic and thermal Free Energies= |             |             | -2109.070018                |
| C                                            | -1.79036700 | 0.49924500  | -0.96644000                 |
| C                                            | -0.67136300 | 1.26126500  | -0.38867100                 |
| N                                            | 0.58785100  | 0.68055700  | -0.56496200                 |
| C                                            | 0.96019200  | 0.17888900  | -1.89367800                 |
| C                                            | -0.22144300 | -0.26655500 | -2.69339400                 |
| C                                            | -1.48162900 | -0.11040100 | -2.25715300                 |
| C                                            | 1.60621000  | 0.76598200  | 0.35433800                  |
| C                                            | 2.83722100  | 0.22634100  | 0.10082600                  |
| C                                            | 3.07796300  | -0.63153700 | -1.12819600                 |
| O                                            | 1.82195700  | -0.92606000 | -1.75927200                 |
| C                                            | -1.99560200 | -0.91707300 | 0.50971100                  |
| C                                            | -2.38469300 | -2.03434700 | -0.43619000                 |
| C                                            | -3.15988300 | -0.42731300 | 1.37735800                  |
| O                                            | -0.89586100 | -1.07741300 | 1.11534700                  |
| C                                            | -3.47533300 | 0.91959100  | 1.59444800                  |
| C                                            | -4.48084500 | 1.27937100  | 2.49685000                  |
| C                                            | -5.18632100 | 0.30005600  | 3.19974500                  |
| C                                            | -4.86703200 | -1.04733200 | 3.00698300                  |
| C                                            | -3.85665700 | -1.40185800 | 2.11112900                  |
| N                                            | -1.55040200 | -3.02376300 | -0.82428600                 |
| C                                            | -2.17759300 | -3.80852900 | -1.77439000                 |
| C                                            | -3.42515100 | -3.29756500 | -1.96401600                 |
| N                                            | -3.54252400 | -2.20169200 | -1.12671100                 |
| C                                            | -0.16634200 | -3.24944700 | -0.38254100                 |
| C                                            | -4.72899100 | -1.35465200 | -1.06145800                 |
| C                                            | 1.27115400  | 1.53080700  | 1.63349900                  |
| O                                            | 1.12737100  | 2.72336300  | 1.60040700                  |
| O                                            | 1.05295700  | 0.84257700  | 2.75210000                  |
| C                                            | 1.30879600  | -0.55258000 | 2.90060000                  |
| C                                            | 3.96917300  | 0.30070900  | 1.02669200                  |
| O                                            | 4.98869200  | -0.35327700 | 0.89897700                  |

|   |             |             |             |
|---|-------------|-------------|-------------|
| O | 3.78558000  | 1.16276000  | 2.04219800  |
| C | 4.82090800  | 1.24973200  | 3.01465600  |
| C | 3.57127100  | -2.03868200 | -0.71451600 |
| O | 4.38364000  | -2.68640600 | -1.31712800 |
| O | 2.90824400  | -2.49295200 | 0.36505900  |
| C | 3.31541400  | -3.76863000 | 0.85108000  |
| H | -2.73346200 | 1.04794000  | -0.94945000 |
| H | 1.49242200  | 1.00275600  | -2.41118900 |
| H | 0.01679900  | -0.72076300 | -3.65658600 |
| H | -2.30708600 | -0.45081700 | -2.88883300 |
| H | -2.94248700 | 1.71052900  | 1.06694100  |
| H | -4.71047400 | 2.33646700  | 2.65011900  |
| H | -5.97402500 | 0.58503500  | 3.90104800  |
| H | -5.40009800 | -1.82330100 | 3.56235400  |
| H | -3.59673100 | -2.45650100 | 1.98003200  |
| H | -1.68132800 | -4.65914200 | -2.23090900 |
| H | -4.23474000 | -3.61538700 | -2.61386200 |
| H | 0.48945200  | -2.46169000 | -0.76869800 |
| H | -0.12177900 | -3.23337800 | 0.70812700  |
| H | 0.14303500  | -4.22531100 | -0.77965800 |
| H | -4.43683700 | -0.29993600 | -1.03932800 |
| H | -5.33436600 | -1.54569900 | -1.95622600 |
| H | -5.31373200 | -1.56998300 | -0.15777800 |
| H | 2.23891800  | -0.67475000 | 3.47778400  |
| H | 0.45905000  | -0.97508700 | 3.44917400  |
| H | 1.38909600  | -1.06755500 | 1.93905300  |
| H | 4.47416600  | 1.97556000  | 3.75961500  |
| H | 4.99900700  | 0.27010400  | 3.48411900  |
| H | 5.75965600  | 1.58978200  | 2.55281600  |
| H | 2.67020100  | -3.98877200 | 1.71064800  |
| H | 3.20080300  | -4.54022700 | 0.07483000  |
| H | 4.37022600  | -3.73805800 | 1.16228400  |
| C | 4.05979000  | -0.02448500 | -2.12662600 |
| H | 4.19771600  | -0.71357000 | -2.97031100 |
| H | 3.68528800  | 0.94230800  | -2.49016400 |
| H | 5.03132000  | 0.13471900  | -1.64130900 |
| H | -0.81919900 | 1.60390700  | 0.63231300  |
| I | -0.70243400 | 3.44053500  | -1.43152100 |

**TS-1'**

|                                            |                             |
|--------------------------------------------|-----------------------------|
| Zero-point correction=                     | 0.544606 (Hartree/Particle) |
| Thermal correction to Energy=              | 0.583207                    |
| Thermal correction to Enthalpy=            | 0.584151                    |
| Thermal correction to Gibbs Free Energy=   | 0.471582                    |
| Sum of electronic and zero-point Energies= | -2108.990122                |

|                                              |             |             |              |
|----------------------------------------------|-------------|-------------|--------------|
| Sum of electronic and thermal Energies=      |             |             | -2108.951521 |
| Sum of electronic and thermal Enthalpies=    |             |             | -2108.950577 |
| Sum of electronic and thermal Free Energies= |             |             | -2109.063146 |
| C                                            | -0.28611900 | -2.99252500 | -0.22713200  |
| C                                            | -1.29149400 | -2.02202200 | 0.17384300   |
| N                                            | -0.96105200 | -0.68718100 | -0.00144300  |
| C                                            | -0.17012300 | -0.41498400 | -1.23130900  |
| C                                            | 1.11032500  | -1.21874600 | -1.19364800  |
| C                                            | 0.83967500  | -2.60178000 | -0.88944800  |
| C                                            | -1.65401100 | 0.35314800  | 0.59002000   |
| C                                            | -1.72738700 | 1.58032200  | 0.00903300   |
| C                                            | -0.96710600 | 1.86144800  | -1.26789000  |
| O                                            | 0.11675500  | 0.92951100  | -1.37308100  |
| C                                            | 2.28117100  | -0.29368600 | 0.41383500   |
| C                                            | 2.79011500  | -1.64272800 | 0.84822700   |
| C                                            | 3.33244700  | 0.58078800  | -0.26508600  |
| C                                            | 3.08520600  | 1.36627300  | -1.39770400  |
| C                                            | 4.05856300  | 2.24939200  | -1.87323900  |
| C                                            | 5.29073100  | 2.36804000  | -1.22385100  |
| C                                            | 5.54008500  | 1.60373300  | -0.08072800  |
| C                                            | 4.56434100  | 0.72451700  | 0.39529400   |
| N                                            | 2.30369900  | -2.32004400 | 1.91448300   |
| C                                            | 2.90937800  | -3.56285900 | 1.98671600   |
| C                                            | 3.78507700  | -3.64725400 | 0.94939600   |
| N                                            | 3.70571200  | -2.45228000 | 0.25373800   |
| C                                            | 1.29833000  | -1.85975600 | 2.87879100   |
| C                                            | 4.44482200  | -2.18071400 | -0.97382500  |
| C                                            | -2.25705000 | 0.01119900  | 1.94640100   |
| O                                            | -3.19955000 | -0.72657900 | 2.06146300   |
| O                                            | -1.59004600 | 0.43072300  | 3.02980400   |
| C                                            | -0.61290500 | 1.48248700  | 3.01155700   |
| C                                            | -2.54578100 | 2.68564400  | 0.51969000   |
| O                                            | -2.63562500 | 3.76614700  | -0.02792300  |
| O                                            | -3.21937400 | 2.38154600  | 1.64565300   |
| C                                            | -4.08139100 | 3.38444600  | 2.17475400   |
| C                                            | -0.17087000 | 3.18435700  | -1.16855100  |
| O                                            | 0.05742300  | 3.90981800  | -2.10042000  |
| O                                            | 0.34466000  | 3.34069300  | 0.05502800   |
| C                                            | 1.24916800  | 4.42789600  | 0.22446900   |
| H                                            | -0.49305400 | -4.04020400 | -0.00893300  |
| H                                            | -0.81171600 | -0.76697300 | -2.06879900  |
| H                                            | 1.73664300  | -1.03466800 | -2.07149400  |
| H                                            | 1.57769900  | -3.36420700 | -1.15435300  |
| H                                            | 2.11754300  | 1.30437500  | -1.88923500  |

|   |             |             |             |
|---|-------------|-------------|-------------|
| H | 3.84355500  | 2.85505800  | -2.75706400 |
| H | 6.04882900  | 3.05907700  | -1.60015900 |
| H | 6.49173800  | 1.69939900  | 0.44837500  |
| H | 4.75979500  | 0.14824600  | 1.30481200  |
| H | 2.65892300  | -4.27705800 | 2.76475000  |
| H | 4.45181100  | -4.44766700 | 0.64356000  |
| H | 1.68833500  | -1.01901700 | 3.46258200  |
| H | 0.40236700  | -1.52182900 | 2.35602300  |
| H | 1.06726100  | -2.70654000 | 3.53758700  |
| H | 5.33182700  | -1.56601900 | -0.77203500 |
| H | 4.74416000  | -3.14079800 | -1.41298200 |
| H | 3.80614900  | -1.63966500 | -1.67910500 |
| H | -1.12636900 | 2.45387600  | 3.02966100  |
| H | -0.03764000 | 1.36094800  | 3.93902700  |
| H | 0.06211000  | 1.41082900  | 2.15110500  |
| H | -4.53858700 | 2.94731200  | 3.07024000  |
| H | -3.51227700 | 4.29025600  | 2.43319800  |
| H | -4.85501700 | 3.65522500  | 1.44125700  |
| H | 1.55343300  | 4.40874900  | 1.27775900  |
| H | 2.12873300  | 4.29669600  | -0.42372100 |
| H | 0.76007600  | 5.38215000  | -0.02114200 |
| C | -1.84594400 | 1.84812600  | -2.51307000 |
| H | -1.23246300 | 2.06158100  | -3.39870000 |
| H | -2.34059400 | 0.87205800  | -2.61899600 |
| H | -2.61721000 | 2.62474900  | -2.42470800 |
| H | -1.88500800 | -2.22984300 | 1.06170300  |
| I | -3.24343400 | -2.50875600 | -1.33391000 |
| O | 1.49661900  | 0.27513400  | 1.21076600  |

### INT-3

|                                              |             |             |                             |
|----------------------------------------------|-------------|-------------|-----------------------------|
| Zero-point correction=                       |             |             | 0.546120 (Hartree/Particle) |
| Thermal correction to Energy=                |             |             | 0.584708                    |
| Thermal correction to Enthalpy=              |             |             | 0.585652                    |
| Thermal correction to Gibbs Free Energy=     |             |             | 0.472808                    |
| Sum of electronic and zero-point Energies=   |             |             | -2109.004622                |
| Sum of electronic and thermal Energies=      |             |             | -2108.966033                |
| Sum of electronic and thermal Enthalpies=    |             |             | -2108.965089                |
| Sum of electronic and thermal Free Energies= |             |             | -2109.077933                |
| C                                            | 1.69123400  | -0.42761100 | -0.85883700                 |
| C                                            | 0.51126100  | -1.28821400 | -0.44685400                 |
| N                                            | -0.73254900 | -0.72364800 | -0.73723000                 |
| C                                            | -0.98026000 | -0.04398100 | -2.00755200                 |
| C                                            | 0.27154800  | 0.28995700  | -2.75351700                 |
| C                                            | 1.48681100  | 0.13083500  | -2.22877000                 |
| C                                            | -1.81028100 | -0.79598600 | 0.11136900                  |

|   |             |             |             |
|---|-------------|-------------|-------------|
| C | -2.92645400 | -0.03988000 | -0.10531300 |
| C | -2.95395000 | 1.03353500  | -1.17964200 |
| O | -1.66029800 | 1.16473700  | -1.78926900 |
| C | 1.84098900  | 0.73072300  | 0.27863200  |
| C | 2.67666800  | 1.85460000  | -0.42582100 |
| C | 2.67011900  | 0.20495700  | 1.48402400  |
| O | 0.68889700  | 1.20576500  | 0.69836900  |
| C | 3.09134700  | -1.11620500 | 1.67211700  |
| C | 3.75493200  | -1.49406900 | 2.84720200  |
| C | 4.01962800  | -0.55368100 | 3.84224500  |
| C | 3.59327600  | 0.76973300  | 3.66760600  |
| C | 2.91132100  | 1.13501200  | 2.50888400  |
| N | 2.15550400  | 2.98847600  | -0.93980500 |
| C | 3.16265700  | 3.75181200  | -1.50081400 |
| C | 4.32886600  | 3.07104400  | -1.32805900 |
| N | 4.01120900  | 1.89686600  | -0.66525000 |
| C | 0.73455200  | 3.36814300  | -1.00006600 |
| C | 5.00316300  | 0.89368700  | -0.28550200 |
| C | -1.69085400 | -1.84753000 | 1.21321600  |
| O | -1.83808000 | -3.00831300 | 0.94135800  |
| O | -1.32664900 | -1.45452500 | 2.43264200  |
| C | -1.19229300 | -0.06115300 | 2.76570800  |
| C | -4.10408000 | -0.06577600 | 0.76572900  |
| O | -5.01522300 | 0.73822900  | 0.69886600  |
| O | -4.08151100 | -1.05865300 | 1.67467300  |
| C | -5.16156100 | -1.11582000 | 2.59894600  |
| C | -3.13076000 | 2.43195800  | -0.54043500 |
| O | -3.70177800 | 3.35328400  | -1.06248700 |
| O | -2.47962000 | 2.51796200  | 0.62634000  |
| C | -2.50528800 | 3.78471600  | 1.27242300  |
| H | 2.59657500  | -1.04429600 | -0.87007100 |
| H | -1.61531700 | -0.72194700 | -2.61420500 |
| H | 0.11761600  | 0.69920200  | -3.75417100 |
| H | 2.37055800  | 0.40830400  | -2.81056200 |
| H | 2.91434500  | -1.88085700 | 0.91354500  |
| H | 4.06366900  | -2.53401300 | 2.97865400  |
| H | 4.54351800  | -0.84862200 | 4.75449300  |
| H | 3.78205100  | 1.51270600  | 4.44695800  |
| H | 2.53072800  | 2.15168900  | 2.38634000  |
| H | 2.95768600  | 4.70813500  | -1.97243700 |
| H | 5.34854100  | 3.31765300  | -1.60828200 |
| H | 0.19970100  | 2.68211300  | -0.32511600 |
| H | 0.64695100  | 4.41966000  | -0.69360400 |
| H | 0.37096500  | 3.23912000  | -2.02747900 |

|   |             |             |             |
|---|-------------|-------------|-------------|
| H | 4.65687700  | -0.10903100 | -0.55750000 |
| H | 5.93130200  | 1.11258200  | -0.82789200 |
| H | 5.18448900  | 0.91955800  | 0.79641400  |
| H | -2.18221800 | 0.41655500  | 2.79583300  |
| H | -0.75129300 | -0.04943900 | 3.77071700  |
| H | -0.52705300 | 0.46087300  | 2.05670000  |
| H | -4.95006200 | -1.96688800 | 3.25712100  |
| H | -5.22661000 | -0.18435700 | 3.18174000  |
| H | -6.11617800 | -1.26412200 | 2.07249700  |
| H | -1.87700000 | 3.68277500  | 2.16544100  |
| H | -2.10657600 | 4.56870800  | 0.61067700  |
| H | -3.53507400 | 4.05436400  | 1.55223500  |
| C | -4.01723500 | 0.81212700  | -2.25195900 |
| H | -3.99641000 | 1.65187000  | -2.95908100 |
| H | -3.82258500 | -0.12905000 | -2.78599300 |
| H | -5.01259000 | 0.76053100  | -1.79334100 |
| H | 0.56570200  | -1.59952100 | 0.59646900  |
| I | 0.80302800  | -3.35304900 | -1.48667600 |

### INT-3'

|                                              |             |             |                             |
|----------------------------------------------|-------------|-------------|-----------------------------|
| Zero-point correction=                       |             |             | 0.546282 (Hartree/Particle) |
| Thermal correction to Energy=                |             |             | 0.584697                    |
| Thermal correction to Enthalpy=              |             |             | 0.585641                    |
| Thermal correction to Gibbs Free Energy=     |             |             | 0.473585                    |
| Sum of electronic and zero-point Energies=   |             |             | -2109.003851                |
| Sum of electronic and thermal Energies=      |             |             | -2108.965436                |
| Sum of electronic and thermal Enthalpies=    |             |             | -2108.964492                |
| Sum of electronic and thermal Free Energies= |             |             | -2109.076548                |
| C                                            | -0.11336300 | -3.05137600 | 0.03435000                  |
| C                                            | -1.21634000 | -2.13656700 | 0.36210300                  |
| N                                            | -1.00350200 | -0.80553000 | 0.09146000                  |
| C                                            | -0.15789000 | -0.53974900 | -1.09025500                 |
| C                                            | 1.22509300  | -1.18246000 | -0.90606400                 |
| C                                            | 1.00989300  | -2.62777400 | -0.56711100                 |
| C                                            | -1.74184800 | 0.21800100  | 0.65443900                  |
| C                                            | -1.89871800 | 1.40506400  | 0.01201800                  |
| C                                            | -1.18389400 | 1.63334700  | -1.30114500                 |
| O                                            | -0.00940900 | 0.80964300  | -1.32299300                 |
| C                                            | 2.09053000  | -0.45989100 | 0.24017000                  |
| C                                            | 3.31971300  | -1.45713700 | 0.48127200                  |
| C                                            | 2.74947200  | 0.87968400  | -0.21792100                 |
| C                                            | 2.74292500  | 1.41585300  | -1.50972100                 |
| C                                            | 3.36216700  | 2.64021300  | -1.78135300                 |
| C                                            | 4.01261100  | 3.34318500  | -0.76478200                 |
| C                                            | 4.01813200  | 2.82075000  | 0.53339600                  |

|   |             |             |             |
|---|-------------|-------------|-------------|
| C | 3.38024800  | 1.60905600  | 0.80071400  |
| N | 3.44024800  | -2.27302200 | 1.55175400  |
| C | 4.63184500  | -2.97129300 | 1.48511500  |
| C | 5.26031300  | -2.58103400 | 0.34417800  |
| N | 4.43639700  | -1.65080100 | -0.26793000 |
| C | 2.45378000  | -2.49580500 | 2.61774500  |
| C | 4.79681500  | -0.98747700 | -1.51773700 |
| C | -2.32258900 | -0.10070400 | 2.02658000  |
| O | -3.25646800 | -0.85039100 | 2.15615100  |
| O | -1.68143400 | 0.39245200  | 3.08209700  |
| C | -0.58567200 | 1.31829900  | 2.95662400  |
| C | -2.76644700 | 2.49397700  | 0.47364200  |
| O | -2.97613900 | 3.50295400  | -0.17070400 |
| O | -3.33139600 | 2.26297300  | 1.67170400  |
| C | -4.23817200 | 3.24594000  | 2.16112200  |
| C | -0.54771800 | 3.04224700  | -1.35194000 |
| O | -0.47362900 | 3.72164700  | -2.34118500 |
| O | 0.00040100  | 3.35514100  | -0.17273800 |
| C | 0.65465000  | 4.61852800  | -0.09765000 |
| H | -0.27109000 | -4.10240400 | 0.28140100  |
| H | -0.66459600 | -1.04625900 | -1.93873100 |
| H | 1.73619300  | -1.11773600 | -1.87970300 |
| H | 1.80370200  | -3.34509500 | -0.79279600 |
| H | 2.23182900  | 0.90168500  | -2.32177700 |
| H | 3.32228000  | 3.05003100  | -2.79355000 |
| H | 4.49872600  | 4.29824600  | -0.97871300 |
| H | 4.51066800  | 3.36735100  | 1.34204400  |
| H | 3.33180400  | 1.21085000  | 1.81615000  |
| H | 4.91998300  | -3.68330900 | 2.25262400  |
| H | 6.21490600  | -2.87437000 | -0.08215100 |
| H | 2.96074800  | -2.40132700 | 3.58810100  |
| H | 1.68262700  | -1.72084100 | 2.47451000  |
| H | 2.03763700  | -3.50692900 | 2.50848800  |
| H | 5.11242200  | 0.04637000  | -1.33171900 |
| H | 5.61672700  | -1.55447500 | -1.97608900 |
| H | 3.94500900  | -0.97476400 | -2.20484300 |
| H | -0.96553600 | 2.30746900  | 2.66576100  |
| H | -0.14898700 | 1.37850200  | 3.96209300  |
| H | 0.16965100  | 0.95516700  | 2.24133900  |
| H | -4.58256000 | 2.87934600  | 3.13526300  |
| H | -3.73571600 | 4.21889700  | 2.26897700  |
| H | -5.08817100 | 3.36552100  | 1.47303900  |
| H | 1.11753600  | 4.66253500  | 0.89518200  |
| H | 1.42549700  | 4.70062400  | -0.87575700 |

|   |             |             |             |
|---|-------------|-------------|-------------|
| H | -0.07591600 | 5.43231000  | -0.22267700 |
| C | -2.06707400 | 1.39238100  | -2.51893700 |
| H | -1.48958400 | 1.56670600  | -3.43701600 |
| H | -2.46319400 | 0.36653500  | -2.50665700 |
| H | -2.91198200 | 2.09354700  | -2.49796100 |
| H | -1.77622000 | -2.33369700 | 1.27494700  |
| I | -3.00552900 | -2.96394900 | -1.12065500 |
| O | 1.41630800  | -0.30157400 | 1.35702000  |

## TS-2

Zero-point correction= 0.545195 (Hartree/Particle)

Thermal correction to Energy= 0.583675

Thermal correction to Enthalpy= 0.584619

Thermal correction to Gibbs Free Energy= 0.471218

Sum of electronic and zero-point Energies= -2108.996472

Sum of electronic and thermal Energies= -2108.957992

Sum of electronic and thermal Enthalpies= -2108.957048

Sum of electronic and thermal Free Energies= -2109.070449

|   |             |             |             |
|---|-------------|-------------|-------------|
| C | -1.58511100 | 0.49002700  | -0.93528200 |
| C | -0.36566900 | 1.26881400  | -0.45789100 |
| N | 0.83792600  | 0.58489800  | -0.64998600 |
| C | 1.13626500  | 0.01139100  | -1.96615900 |
| C | -0.09908000 | -0.33944200 | -2.73374300 |
| C | -1.33062900 | -0.12160400 | -2.27564500 |
| C | 1.87983600  | 0.61127900  | 0.24657000  |
| C | 3.04520000  | -0.05421900 | 0.00103600  |
| C | 3.18408600  | -0.95813700 | -1.21111300 |
| O | 1.89869300  | -1.15111800 | -1.82369500 |
| C | -1.87964700 | -0.59231600 | 0.16432600  |
| C | -3.46189500 | -1.51231500 | -0.66289100 |
| C | -2.56715600 | -0.05329700 | 1.42168900  |
| O | -1.01621500 | -1.48316800 | 0.34745400  |
| C | -2.93265500 | 1.28514200  | 1.61549900  |
| C | -3.52508300 | 1.69432200  | 2.81566100  |
| C | -3.77108200 | 0.76845100  | 3.83042000  |
| C | -3.40015200 | -0.57004700 | 3.64802700  |
| C | -2.79019000 | -0.96983800 | 2.46044800  |
| N | -3.30356400 | -2.76451300 | -1.15019700 |
| C | -4.52234900 | -3.41665600 | -1.24333500 |
| C | -5.46709100 | -2.54451600 | -0.79703700 |
| N | -4.79504300 | -1.38165200 | -0.45131300 |
| C | -2.03644000 | -3.34830300 | -1.58943000 |
| C | -5.44979700 | -0.20604800 | 0.10502200  |
| C | 1.62427000  | 1.45522400  | 1.49090600  |
| O | 1.75508300  | 2.64825200  | 1.46391800  |

|   |             |             |             |
|---|-------------|-------------|-------------|
| O | 1.13181300  | 0.82780800  | 2.56166100  |
| C | 1.05442500  | -0.60499900 | 2.61803400  |
| C | 4.18262300  | -0.06912300 | 0.92517700  |
| O | 5.20692900  | -0.69510000 | 0.73119200  |
| O | 3.98328500  | 0.66535600  | 2.03673400  |
| C | 5.04771800  | 0.71626000  | 2.98029700  |
| C | 3.53587900  | -2.39838400 | -0.76757000 |
| O | 4.20918000  | -3.16164900 | -1.40742400 |
| O | 2.93089000  | -2.71794000 | 0.38504200  |
| C | 3.16552300  | -4.03790500 | 0.86632300  |
| H | -2.44345200 | 1.16807900  | -1.00792900 |
| H | 1.71409200  | 0.77971100  | -2.52266200 |
| H | 0.08711800  | -0.79256100 | -3.70991300 |
| H | -2.19944600 | -0.40131100 | -2.87562000 |
| H | -2.76265500 | 2.03385700  | 0.83951800  |
| H | -3.79054800 | 2.74496400  | 2.95479800  |
| H | -4.23786000 | 1.08811100  | 4.76511500  |
| H | -3.57842500 | -1.29938500 | 4.44245500  |
| H | -2.46461300 | -2.00057600 | 2.30793400  |
| H | -4.61131300 | -4.43101300 | -1.62222800 |
| H | -6.54425500 | -2.64825700 | -0.70049400 |
| H | -1.21925600 | -2.80861700 | -1.09322600 |
| H | -2.01888200 | -4.41018600 | -1.30763700 |
| H | -1.94120500 | -3.25898500 | -2.68144000 |
| H | -4.94669600 | 0.69958800  | -0.24872700 |
| H | -6.49522100 | -0.18960300 | -0.23100200 |
| H | -5.41367900 | -0.22034300 | 1.20338000  |
| H | 2.06289300  | -1.03500600 | 2.69415300  |
| H | 0.48394300  | -0.82752100 | 3.52831300  |
| H | 0.52392800  | -1.02116900 | 1.74952400  |
| H | 4.69326300  | 1.35209800  | 3.80024600  |
| H | 5.29039600  | -0.29173700 | 3.34910400  |
| H | 5.95103400  | 1.14708100  | 2.52340500  |
| H | 2.58600800  | -4.13326600 | 1.79265900  |
| H | 2.83658900  | -4.78634000 | 0.12996800  |
| H | 4.23723500  | -4.18892700 | 1.06569700  |
| C | 4.20459700  | -0.47172800 | -2.23641400 |
| H | 4.27010200  | -1.19986200 | -3.05564300 |
| H | 3.90953000  | 0.51061800  | -2.63155800 |
| H | 5.19085200  | -0.37890900 | -1.76435100 |
| H | -0.46498700 | 1.60965200  | 0.57258700  |
| I | -0.37613900 | 3.32956500  | -1.52344500 |

**TS-2'**

Zero-point correction=

0.545273 (Hartree/Particle)

|                                              |             |             |              |
|----------------------------------------------|-------------|-------------|--------------|
| Thermal correction to Energy=                |             |             | 0.583623     |
| Thermal correction to Enthalpy=              |             |             | 0.584567     |
| Thermal correction to Gibbs Free Energy=     |             |             | 0.472044     |
| Sum of electronic and zero-point Energies=   |             |             | -2109.000804 |
| Sum of electronic and thermal Energies=      |             |             | -2108.962454 |
| Sum of electronic and thermal Enthalpies=    |             |             | -2108.961510 |
| Sum of electronic and thermal Free Energies= |             |             | -2109.074033 |
| C                                            | 1.55462700  | -2.18131900 | 1.32238600   |
| C                                            | 0.20146600  | -2.23554700 | 1.40106200   |
| N                                            | -0.63127400 | -1.58482900 | 0.52231300   |
| C                                            | 0.00832200  | -0.96864400 | -0.65971400  |
| C                                            | 1.33330200  | -0.28659800 | -0.29195000  |
| C                                            | 2.23150000  | -1.31322600 | 0.37609400   |
| C                                            | -1.99491100 | -1.49769500 | 0.67006400   |
| C                                            | -2.79192700 | -0.98186800 | -0.30805800  |
| C                                            | -2.16261700 | -0.39917800 | -1.55334100  |
| O                                            | -0.81046500 | -0.02964100 | -1.25264700  |
| C                                            | 1.12165200  | 0.99217500  | 0.65108800   |
| C                                            | 2.59895100  | 1.43626500  | 1.10150900   |
| C                                            | 0.62589000  | 2.25633400  | -0.14071100  |
| C                                            | 0.59401400  | 2.42476900  | -1.53114900  |
| C                                            | 0.12543200  | 3.61382000  | -2.10087900  |
| C                                            | -0.30712300 | 4.66275500  | -1.28758600  |
| C                                            | -0.29323400 | 4.50120100  | 0.10192600   |
| C                                            | 0.15692900  | 3.30623400  | 0.66270900   |
| N                                            | 2.98312400  | 1.62741300  | 2.38375100   |
| C                                            | 4.30219700  | 2.04290800  | 2.42811200   |
| C                                            | 4.74589200  | 2.10043300  | 1.14482200   |
| N                                            | 3.68647200  | 1.72517200  | 0.33691400   |
| C                                            | 2.18750300  | 1.42848000  | 3.60376300   |
| C                                            | 3.81160800  | 1.62121800  | -1.11452800  |
| C                                            | -2.51757800 | -2.01581700 | 2.00378900   |
| O                                            | -2.65955700 | -3.19362300 | 2.20958300   |
| O                                            | -2.69049700 | -1.10979600 | 2.96122800   |
| C                                            | -2.54421700 | 0.29805000  | 2.69006100   |
| C                                            | -4.25180200 | -0.92778900 | -0.24242500  |
| O                                            | -4.95553900 | -0.55742800 | -1.16289400  |
| O                                            | -4.75471100 | -1.32379500 | 0.94325500   |
| C                                            | -6.17230000 | -1.35221200 | 1.06782100   |
| C                                            | -2.77262100 | 0.98257700  | -1.89195300  |
| O                                            | -2.94443400 | 1.39342400  | -3.00902700  |
| O                                            | -2.99315100 | 1.69379000  | -0.78123400  |
| C                                            | -3.53021700 | 3.00065500  | -0.97052100  |
| H                                            | 2.14274800  | -2.77899400 | 2.01904500   |

|   |             |             |             |
|---|-------------|-------------|-------------|
| H | 0.23523100  | -1.80008900 | -1.35552600 |
| H | 1.77329000  | 0.01901200  | -1.24450400 |
| H | 0.87641300  | 1.61081300  | -2.19775800 |
| H | 0.08142200  | 3.70771400  | -3.18851600 |
| H | -0.67041100 | 5.59193800  | -1.73340400 |
| H | -0.64834500 | 5.30676800  | 0.75028100  |
| H | 0.12565800  | 3.14202400  | 1.74117500  |
| H | 4.80167900  | 2.25550700  | 3.36837500  |
| H | 5.71408300  | 2.37090200  | 0.73456300  |
| H | 2.00095600  | 2.40557700  | 4.07224600  |
| H | 1.24653800  | 0.96037100  | 3.27247300  |
| H | 2.76199000  | 0.79172200  | 4.29083400  |
| H | 2.94100100  | 2.07687700  | -1.59673900 |
| H | 4.71286400  | 2.16776900  | -1.41716300 |
| H | 3.90913400  | 0.56977400  | -1.42306300 |
| H | -3.38551200 | 0.64875100  | 2.07614100  |
| H | -2.58046600 | 0.78331700  | 3.67387300  |
| H | -1.58434100 | 0.52292600  | 2.19550000  |
| H | -6.37871700 | -1.69724100 | 2.08791600  |
| H | -6.59768400 | -0.35064700 | 0.90467600  |
| H | -6.61351900 | -2.04217500 | 0.33309900  |
| H | -3.56210800 | 3.46308400  | 0.02300700  |
| H | -2.88724500 | 3.58806700  | -1.63926700 |
| H | -4.54113800 | 2.93596600  | -1.40098600 |
| C | -2.23447200 | -1.31956300 | -2.76600300 |
| H | -1.77175300 | -0.82898300 | -3.63284400 |
| H | -1.72453500 | -2.27077300 | -2.55588700 |
| H | -3.28639600 | -1.53049600 | -2.99936900 |
| O | 0.37117900  | 0.74227000  | 1.69769200  |
| H | 3.16170100  | -0.89753500 | 0.76908700  |
| H | -0.29268700 | -2.83335300 | 2.16553600  |
| I | 3.30399400  | -2.57198100 | -1.31772900 |

#### INT-4

|                                              |             |             |                             |
|----------------------------------------------|-------------|-------------|-----------------------------|
| Zero-point correction=                       |             |             | 0.416533 (Hartree/Particle) |
| Thermal correction to Energy=                |             |             | 0.447916                    |
| Thermal correction to Enthalpy=              |             |             | 0.448860                    |
| Thermal correction to Gibbs Free Energy=     |             |             | 0.350422                    |
| Sum of electronic and zero-point Energies=   |             |             | -1804.511950                |
| Sum of electronic and thermal Energies=      |             |             | -1804.480567                |
| Sum of electronic and thermal Enthalpies=    |             |             | -1804.479623                |
| Sum of electronic and thermal Free Energies= |             |             | -1804.578061                |
| C                                            | -2.04198800 | -0.74929800 | 1.47422400                  |
| C                                            | -1.30689600 | -0.81055600 | 0.13501400                  |
| N                                            | 0.07877000  | -0.66011400 | 0.28180300                  |

|   |             |             |             |
|---|-------------|-------------|-------------|
| C | 0.76428000  | -1.63083300 | 1.15075900  |
| C | -0.02850700 | -1.87671100 | 2.39897300  |
| C | -1.28828200 | -1.47126900 | 2.55229100  |
| C | 0.85610500  | 0.06412400  | -0.59936900 |
| C | 2.21234100  | -0.02316700 | -0.59875600 |
| C | 2.91926600  | -0.89541400 | 0.42150300  |
| O | 2.01879000  | -1.15081700 | 1.51550800  |
| C | -2.22039000 | 0.75173800  | 1.81228400  |
| C | -3.20816200 | 1.53862200  | 1.01351000  |
| O | -1.52734900 | 1.27471400  | 2.66082100  |
| C | -4.06984100 | 0.96047600  | 0.06492000  |
| C | -4.94432900 | 1.76159300  | -0.67054000 |
| C | -4.96977200 | 3.14332000  | -0.46454700 |
| C | -4.11978300 | 3.72674900  | 0.48244800  |
| C | -3.24588000 | 2.92961800  | 1.21580100  |
| C | 0.05491300  | 1.01293300  | -1.47809600 |
| O | -0.42828500 | 0.67142700  | -2.52185800 |
| O | -0.21453000 | 2.20931600  | -0.93832400 |
| C | 0.47133000  | 2.66945400  | 0.23276100  |
| C | 3.07520600  | 0.75302100  | -1.49816800 |
| O | 4.27336500  | 0.58575600  | -1.59589600 |
| O | 2.40826000  | 1.69226900  | -2.19563400 |
| C | 3.15216800  | 2.43644600  | -3.15795600 |
| C | 4.04349400  | -0.09918500 | 1.12502800  |
| O | 5.08549500  | -0.57166400 | 1.48989600  |
| O | 3.67618100  | 1.17279700  | 1.34055200  |
| C | 4.63941900  | 1.99339500  | 2.00085900  |
| H | -3.03771900 | -1.19695500 | 1.35395700  |
| H | 0.85709100  | -2.57201800 | 0.56810700  |
| H | 0.50763900  | -2.41269600 | 3.18488600  |
| H | -1.81215300 | -1.64864100 | 3.49431200  |
| H | -4.06843000 | -0.11588400 | -0.11597400 |
| H | -5.60553300 | 1.30420400  | -1.40943300 |
| H | -5.65292900 | 3.76829800  | -1.04450900 |
| H | -4.14009800 | 4.80699300  | 0.64351700  |
| H | -2.57135000 | 3.35876000  | 1.95840600  |
| H | 1.53038500  | 2.85286400  | 0.00634200  |
| H | -0.02373200 | 3.60653100  | 0.51379700  |
| H | 0.39108100  | 1.95558700  | 1.06371300  |
| H | 2.43753800  | 3.12420800  | -3.62496600 |
| H | 3.96649300  | 2.99333100  | -2.67135400 |
| H | 3.58765900  | 1.76514800  | -3.91254800 |
| H | 4.17711700  | 2.98201500  | 2.10858900  |
| H | 4.89240000  | 1.57866700  | 2.98761300  |

|   |             |             |             |
|---|-------------|-------------|-------------|
| H | 5.55849900  | 2.06157200  | 1.39990700  |
| C | 3.48642300  | -2.18616200 | -0.15906800 |
| H | 3.99439800  | -2.75312300 | 0.63232400  |
| H | 2.68711500  | -2.79399100 | -0.60547200 |
| H | 4.21498900  | -1.94076200 | -0.94277600 |
| H | -1.70723200 | -0.11176700 | -0.59855900 |
| I | -1.85767400 | -2.77462800 | -0.93823100 |

#### INT-4'

Zero-point correction= 0.416583 (Hartree/Particle)

Thermal correction to Energy= 0.447930

Thermal correction to Enthalpy= 0.448874

Thermal correction to Gibbs Free Energy= 0.351408

Sum of electronic and zero-point Energies= -1804.521296

Sum of electronic and thermal Energies= -1804.489949

Sum of electronic and thermal Enthalpies= -1804.489005

Sum of electronic and thermal Free Energies= -1804.586471

|   |             |             |             |
|---|-------------|-------------|-------------|
| C | -1.97753300 | -2.56082300 | 1.10005200  |
| C | -2.18430100 | -1.12574400 | 0.82025200  |
| N | -1.05321500 | -0.45878700 | 0.34164900  |
| C | -0.25183100 | -1.23045200 | -0.62196900 |
| C | 0.28354800  | -2.49843800 | 0.07083100  |
| C | -0.84241800 | -3.19513500 | 0.78044100  |
| C | -0.89070600 | 0.91063300  | 0.43303500  |
| C | -0.05058100 | 1.58882200  | -0.38946500 |
| C | 0.68217400  | 0.84411300  | -1.48225700 |
| O | 0.84750900  | -0.52320300 | -1.06917200 |
| C | 1.41164800  | -2.09914900 | 1.05235400  |
| C | 2.83032300  | -2.04238200 | 0.58954900  |
| C | 3.22518600  | -2.26075200 | -0.74036000 |
| C | 4.56790900  | -2.15147800 | -1.10397600 |
| C | 5.53112600  | -1.83005200 | -0.14341000 |
| C | 5.14784900  | -1.61224600 | 1.18521600  |
| C | 3.80727000  | -1.71510800 | 1.54688200  |
| C | -1.75977300 | 1.57984600  | 1.49199600  |
| O | -2.86090900 | 1.97682300  | 1.22808400  |
| O | -1.28557300 | 1.60144600  | 2.74001700  |
| C | 0.05766700  | 1.19021200  | 3.02543400  |
| C | 0.18333500  | 3.03539600  | -0.31234100 |
| O | 0.75958300  | 3.66900600  | -1.17225300 |
| O | -0.28797500 | 3.58823600  | 0.81985100  |
| C | -0.20780800 | 5.00801000  | 0.92983500  |
| C | 2.16013300  | 1.28415100  | -1.58223100 |
| O | 2.77415100  | 1.38886800  | -2.60935700 |
| O | 2.69129100  | 1.42468000  | -0.36101400 |

|   |             |             |             |
|---|-------------|-------------|-------------|
| C | 4.08411600  | 1.73307700  | -0.31588400 |
| H | -2.80149000 | -3.07986900 | 1.59253700  |
| H | -0.93277000 | -1.51682800 | -1.44911800 |
| H | 0.68588900  | -3.15127000 | -0.71633100 |
| H | -0.70476400 | -4.24392000 | 1.05305400  |
| H | 2.48608300  | -2.48039700 | -1.50881200 |
| H | 4.86159600  | -2.30928800 | -2.14381600 |
| H | 6.58195700  | -1.74617400 | -0.43110000 |
| H | 5.89885100  | -1.35971900 | 1.93742600  |
| H | 3.48225900  | -1.54130700 | 2.57366900  |
| H | 0.77600200  | 1.76905700  | 2.42845900  |
| H | 0.21074400  | 1.39947500  | 4.09117500  |
| H | 0.19640500  | 0.11689500  | 2.83755800  |
| H | -0.65155100 | 5.26033500  | 1.89994700  |
| H | 0.83950200  | 5.34068900  | 0.88257600  |
| H | -0.76812400 | 5.49023900  | 0.11542400  |
| H | 4.35044000  | 1.78379400  | 0.74626600  |
| H | 4.66611100  | 0.94469500  | -0.81385600 |
| H | 4.27978400  | 2.69520100  | -0.81191400 |
| C | -0.00974500 | 0.94068300  | -2.83497100 |
| H | 0.56503900  | 0.38448500  | -3.58782700 |
| H | -1.03305600 | 0.54359100  | -2.76729300 |
| H | -0.06261900 | 1.99447500  | -3.13916400 |
| H | -2.70459000 | -0.58083800 | 1.61011000  |
| I | -3.91826500 | -1.05257200 | -0.79187500 |
| O | 1.11609000  | -1.81018300 | 2.19693700  |

#### INT-5

|                                              |             |             |                             |
|----------------------------------------------|-------------|-------------|-----------------------------|
| Zero-point correction=                       |             |             | 0.403581 (Hartree/Particle) |
| Thermal correction to Energy=                |             |             | 0.432974                    |
| Thermal correction to Enthalpy=              |             |             | 0.433919                    |
| Thermal correction to Gibbs Free Energy=     |             |             | 0.340982                    |
| Sum of electronic and zero-point Energies=   |             |             | -1506.118576                |
| Sum of electronic and thermal Energies=      |             |             | -1506.089182                |
| Sum of electronic and thermal Enthalpies=    |             |             | -1506.088238                |
| Sum of electronic and thermal Free Energies= |             |             | -1506.181174                |
| C                                            | -2.07083400 | -1.74827800 | -0.55094800                 |
| C                                            | -1.27903200 | -0.66740500 | -0.29370000                 |
| N                                            | 0.03440800  | -0.61620500 | -0.67188400                 |
| C                                            | 0.73400600  | -1.74519100 | -1.30840900                 |
| C                                            | -0.15625200 | -2.92823000 | -1.50062800                 |
| C                                            | -1.45375600 | -2.92143100 | -1.15086400                 |
| C                                            | 0.86633300  | 0.45675600  | -0.39333900                 |
| C                                            | 2.21583600  | 0.30028500  | -0.42287700                 |
| C                                            | 2.85246900  | -1.08246900 | -0.45134100                 |

|   |             |             |             |
|---|-------------|-------------|-------------|
| O | 1.84189700  | -2.09917100 | -0.51168300 |
| C | 3.86450200  | -1.27000800 | -1.57789700 |
| C | -3.48638100 | -1.81531800 | -0.12807700 |
| C | -4.22416500 | -0.54637700 | 0.20440600  |
| C | -4.04521900 | 0.65343900  | -0.50467900 |
| C | -4.80209500 | 1.78302400  | -0.18205100 |
| C | -5.73688900 | 1.72917100  | 0.85500100  |
| C | -5.93071900 | 0.53352300  | 1.55575400  |
| C | -5.18999900 | -0.59922100 | 1.22242700  |
| O | -4.05909500 | -2.89216300 | -0.04021100 |
| C | 0.18231500  | 1.75665000  | -0.03646800 |
| O | 0.26822600  | 2.29735200  | 1.03405700  |
| O | -0.59049100 | 2.18030700  | -1.04558800 |
| C | -1.33672000 | 3.37593700  | -0.80065000 |
| C | 3.13860200  | 1.43575400  | -0.23100700 |
| O | 4.25112700  | 1.32851300  | 0.23730400  |
| O | 2.62157500  | 2.60727700  | -0.64647300 |
| C | 3.37483300  | 3.77676800  | -0.32946400 |
| C | 3.53241600  | -1.36265200 | 0.91370000  |
| O | 4.56895400  | -1.95755100 | 1.04028100  |
| O | 2.78643500  | -0.91170000 | 1.92447700  |
| C | 3.30945600  | -1.12556900 | 3.23464400  |
| H | -1.64645700 | 0.19315900  | 0.26159300  |
| H | 1.11381300  | -1.36471300 | -2.27877200 |
| H | 0.32243800  | -3.80401800 | -1.94236900 |
| H | -2.08880100 | -3.79742300 | -1.29247300 |
| H | 3.36908300  | -1.16947200 | -2.55440300 |
| H | 4.66675200  | -0.52456200 | -1.50475200 |
| H | 4.31036500  | -2.26899900 | -1.49164400 |
| H | -3.33329300 | 0.69880300  | -1.33038200 |
| H | -4.66846900 | 2.70639400  | -0.75084200 |
| H | -6.32300800 | 2.61522400  | 1.11048100  |
| H | -6.66794000 | 0.48518000  | 2.36062800  |
| H | -5.34496800 | -1.54669100 | 1.74171300  |
| H | -1.88737700 | 3.58409600  | -1.72540800 |
| H | -2.03437500 | 3.22947900  | 0.03699000  |
| H | -0.65980700 | 4.20798800  | -0.55880100 |
| H | 2.83503300  | 4.61840800  | -0.77963800 |
| H | 3.44099500  | 3.90628500  | 0.76134800  |
| H | 4.39233000  | 3.70654900  | -0.73999900 |
| H | 2.57876100  | -0.69328500 | 3.92848700  |
| H | 3.43878300  | -2.20032500 | 3.43108500  |
| H | 4.28402800  | -0.62652200 | 3.34184600  |

INT-5'

|                                              |             |             |                             |
|----------------------------------------------|-------------|-------------|-----------------------------|
| Zero-point correction=                       |             |             | 0.403965 (Hartree/Particle) |
| Thermal correction to Energy=                |             |             | 0.433178                    |
| Thermal correction to Enthalpy=              |             |             | 0.434122                    |
| Thermal correction to Gibbs Free Energy=     |             |             | 0.341581                    |
| Sum of electronic and zero-point Energies=   |             |             | -1506.113727                |
| Sum of electronic and thermal Energies=      |             |             | -1506.084514                |
| Sum of electronic and thermal Enthalpies=    |             |             | -1506.083569                |
| Sum of electronic and thermal Free Energies= |             |             | -1506.176110                |
| C                                            | -0.31477100 | 3.25704300  | 1.54470000                  |
| N                                            | 0.43650700  | 1.50317900  | 0.11208900                  |
| C                                            | -0.81188900 | 0.75633900  | 0.24539300                  |
| C                                            | -1.94063600 | 1.63366200  | 0.70388700                  |
| C                                            | -1.65240800 | 2.79021500  | 1.37168700                  |
| C                                            | 1.47674800  | 0.71695700  | -0.40259000                 |
| C                                            | 1.41273800  | -0.62380900 | -0.23341200                 |
| C                                            | 0.42054700  | -1.24928800 | 0.73759000                  |
| O                                            | -0.57987900 | -0.31647200 | 1.16677800                  |
| C                                            | -0.21916000 | -2.51653400 | 0.17766900                  |
| C                                            | -3.37040100 | 1.37862900  | 0.36623100                  |
| C                                            | -3.79179900 | 0.11159900  | -0.32103300                 |
| C                                            | -4.74922900 | 0.21228500  | -1.34522500                 |
| C                                            | -5.22118100 | -0.93248300 | -1.98419100                 |
| C                                            | -4.76741200 | -2.19527000 | -1.58451100                 |
| C                                            | -3.84084900 | -2.30414200 | -0.54526800                 |
| C                                            | -3.34813200 | -1.15583800 | 0.08085700                  |
| C                                            | 0.68479400  | 2.61105800  | 0.88586800                  |
| O                                            | -4.21820900 | 2.23157000  | 0.59140200                  |
| C                                            | 2.61366000  | 1.37161700  | -1.12457100                 |
| O                                            | 3.69450400  | 0.85967700  | -1.29254500                 |
| O                                            | 2.29350000  | 2.59880300  | -1.55752200                 |
| C                                            | 3.32153300  | 3.30814500  | -2.25150400                 |
| C                                            | 2.42535700  | -1.55743600 | -0.80649500                 |
| O                                            | 3.07974600  | -2.30696100 | -0.12032800                 |
| O                                            | 2.46973400  | -1.51117200 | -2.14094700                 |
| C                                            | 3.52947100  | -2.24479900 | -2.75691700                 |
| C                                            | 1.17426100  | -1.58013600 | 2.05428700                  |
| O                                            | 1.06006900  | -2.61541800 | 2.65328500                  |
| O                                            | 1.91425900  | -0.54456900 | 2.45753800                  |
| C                                            | 2.63926200  | -0.72878500 | 3.67332300                  |
| H                                            | -0.09555600 | 4.15098000  | 2.12736800                  |
| H                                            | -1.02297600 | 0.31273800  | -0.74227900                 |
| H                                            | -2.49758800 | 3.39243000  | 1.71292800                  |
| H                                            | -0.79251400 | -2.28451200 | -0.72966700                 |
| H                                            | 0.54973100  | -3.26455300 | -0.05625000                 |

|   |             |             |             |
|---|-------------|-------------|-------------|
| H | -0.88656600 | -2.94847800 | 0.93370300  |
| H | -5.11510700 | 1.20210800  | -1.62415100 |
| H | -5.95286800 | -0.84424000 | -2.79092400 |
| H | -5.14427900 | -3.09398900 | -2.07898500 |
| H | -3.49851800 | -3.28829000 | -0.21621100 |
| H | -2.63217000 | -1.23760000 | 0.89653200  |
| H | 1.72127100  | 2.94495900  | 0.91746000  |
| H | 2.89862800  | 4.28808200  | -2.50107900 |
| H | 4.21250800  | 3.42017200  | -1.61597100 |
| H | 3.61072500  | 2.76913000  | -3.16567000 |
| H | 3.36118300  | -2.17514900 | -3.83808900 |
| H | 4.49574100  | -1.79100300 | -2.48990300 |
| H | 3.52225600  | -3.29430000 | -2.42949300 |
| H | 3.18111600  | 0.20786600  | 3.85022700  |
| H | 1.95272700  | -0.93901200 | 4.50676600  |
| H | 3.34390500  | -1.56743600 | 3.57313600  |

## 14. $^1\text{H}$ , $^{13}\text{C}$ , and $^{19}\text{F}$ NMR spectra

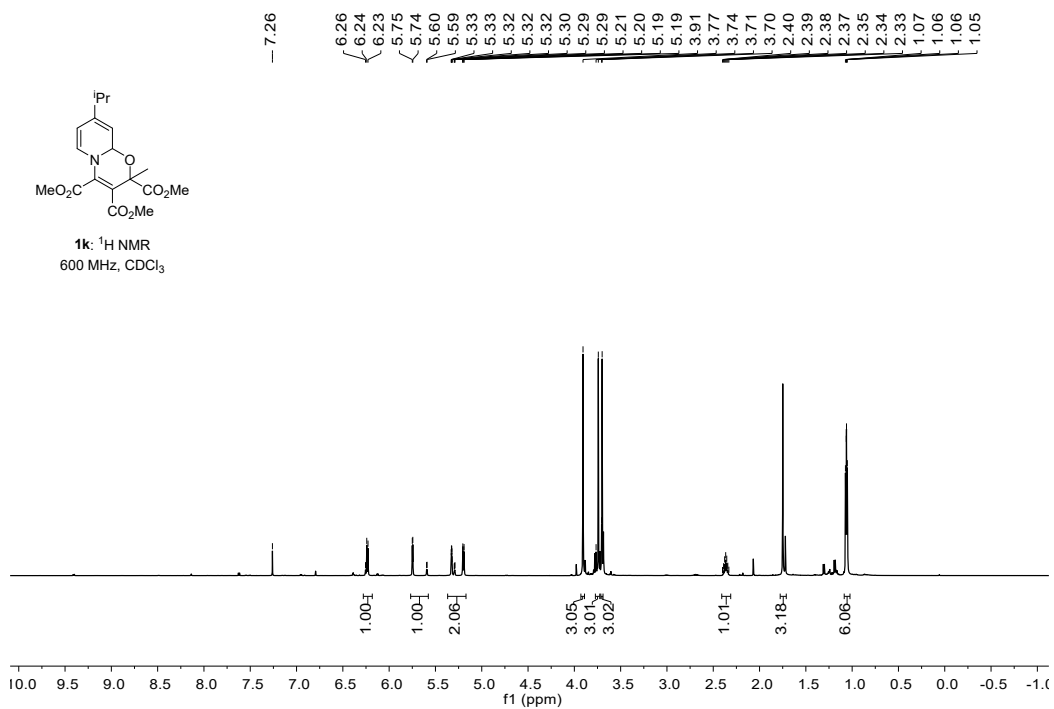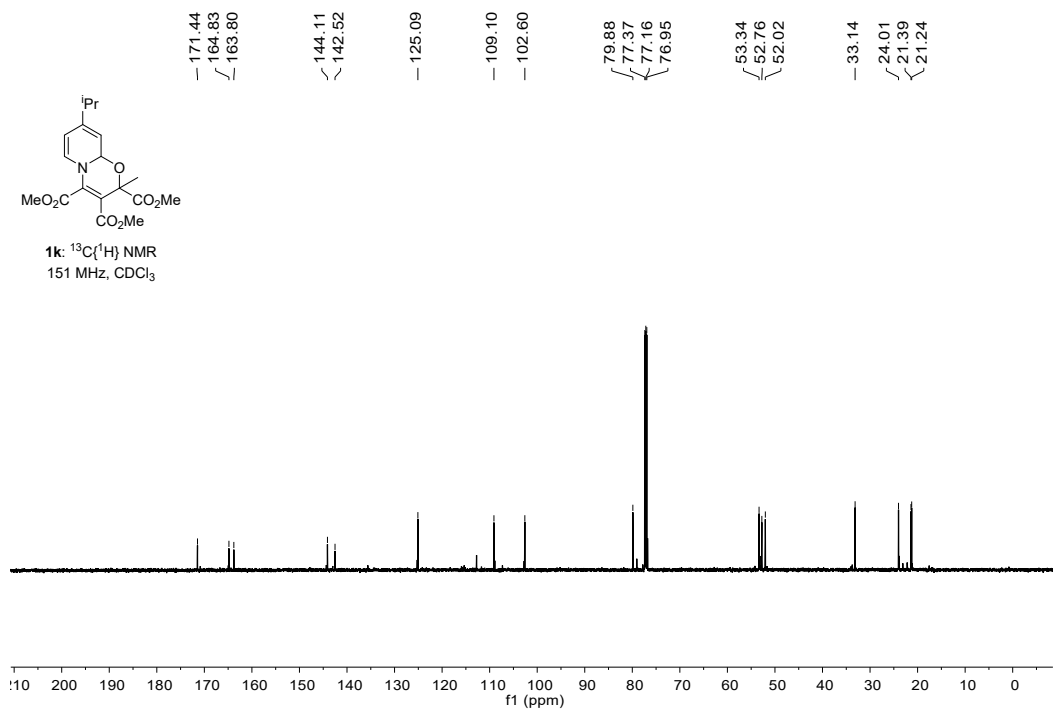

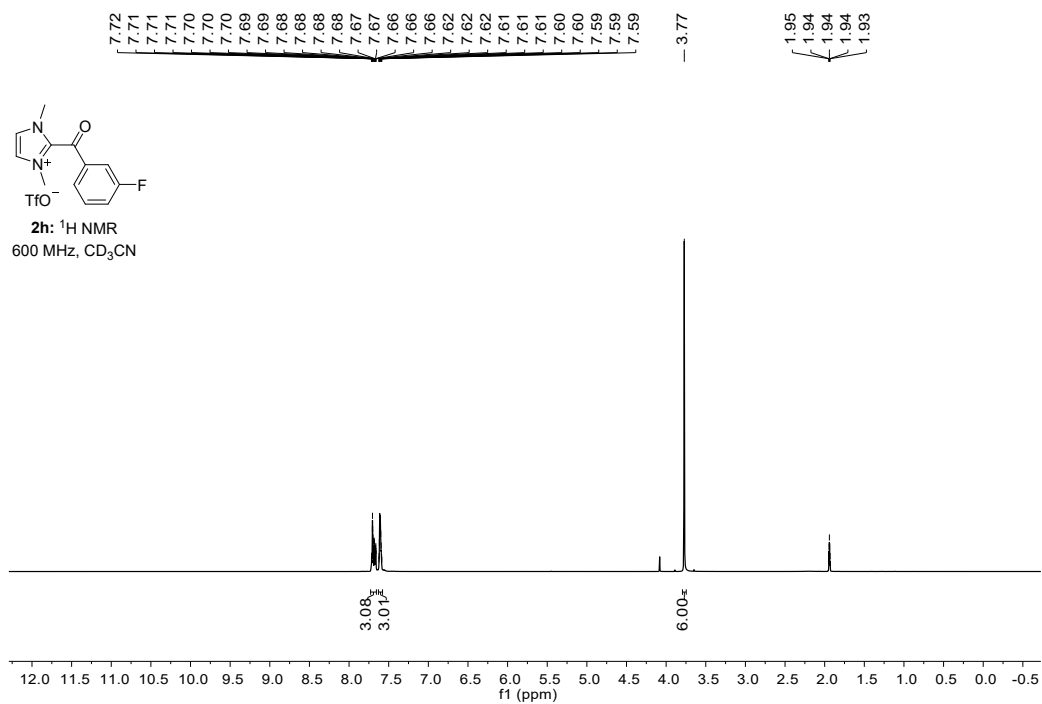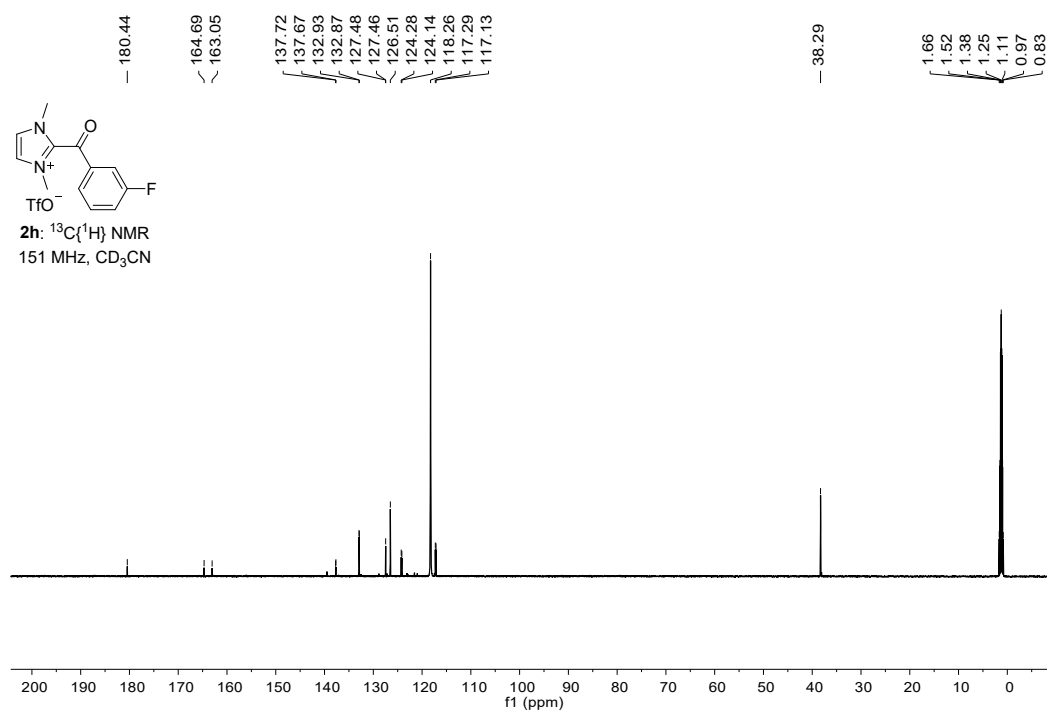

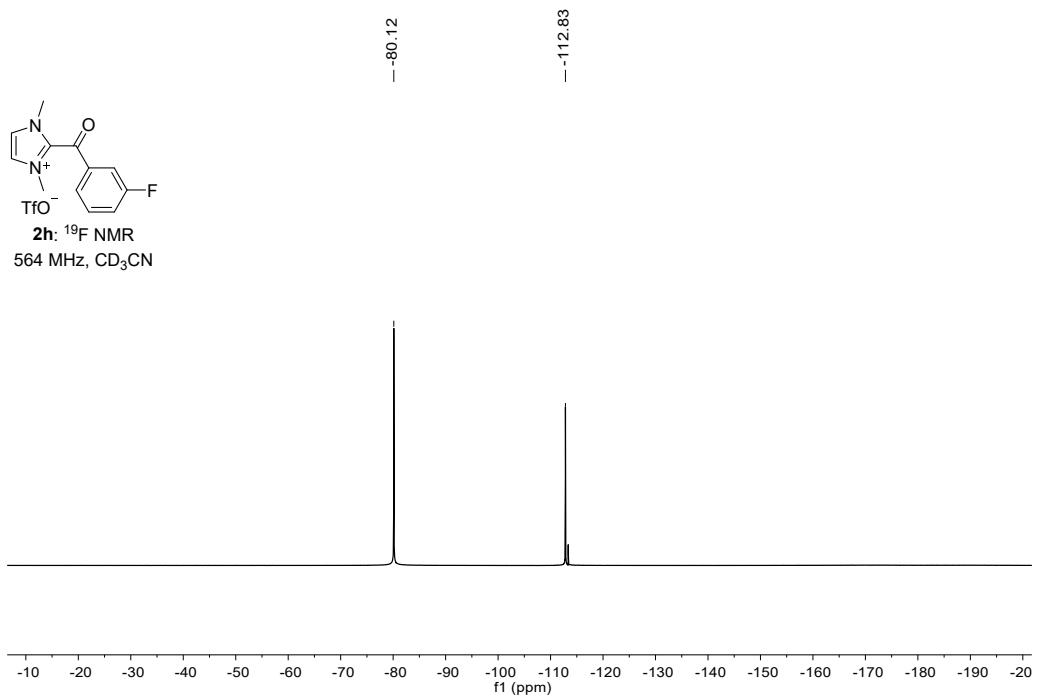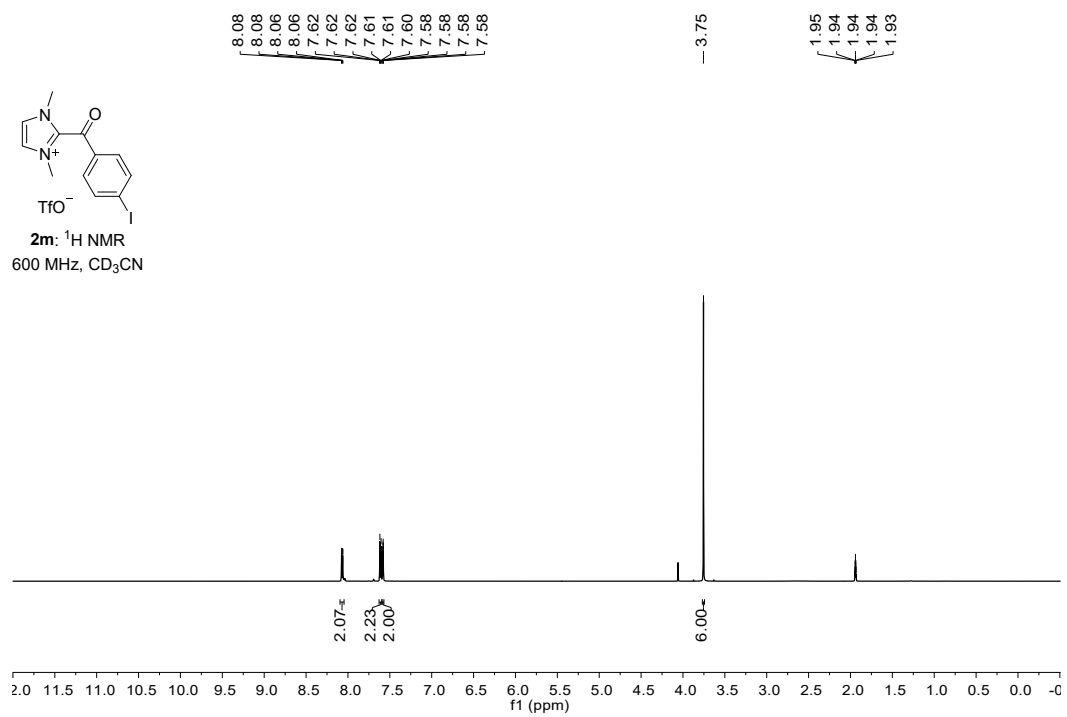

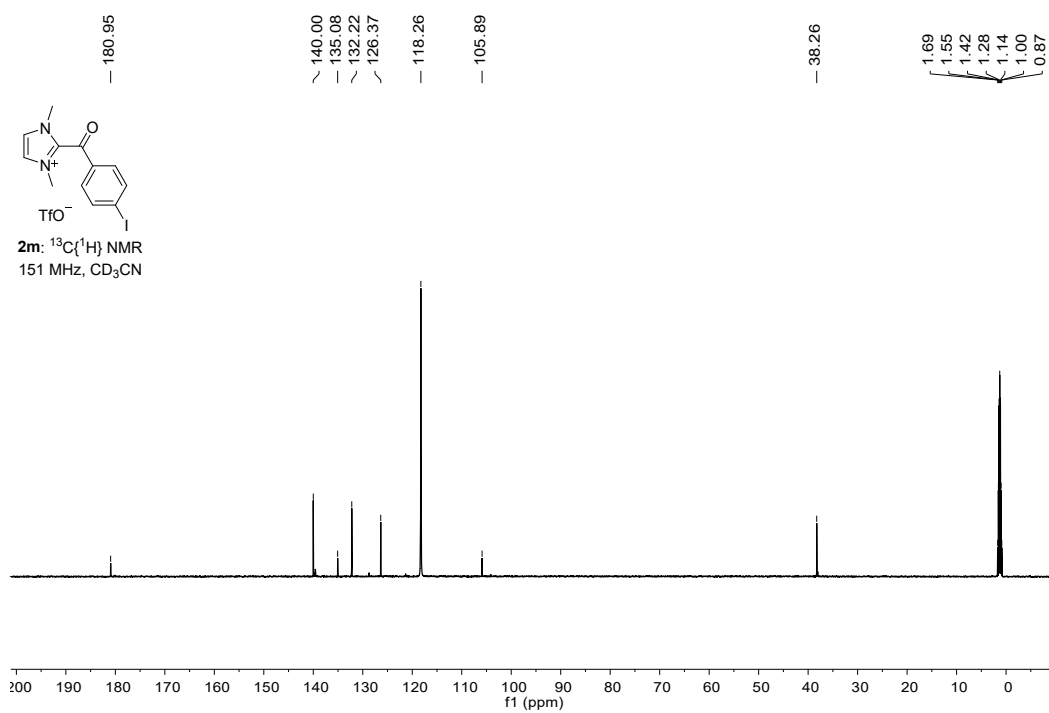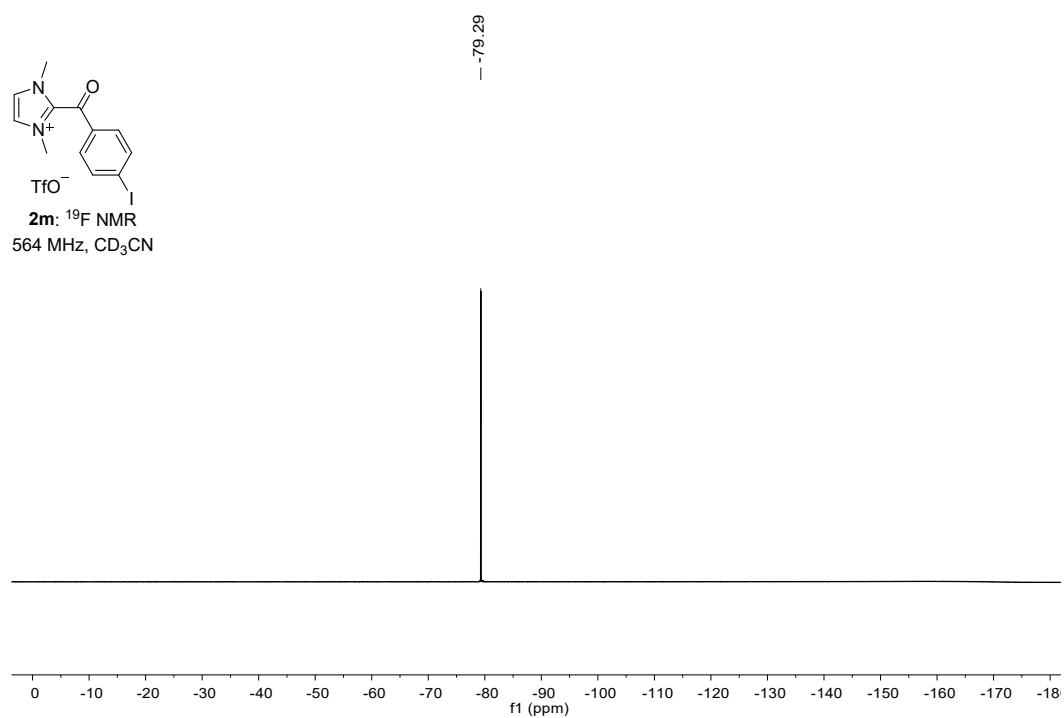

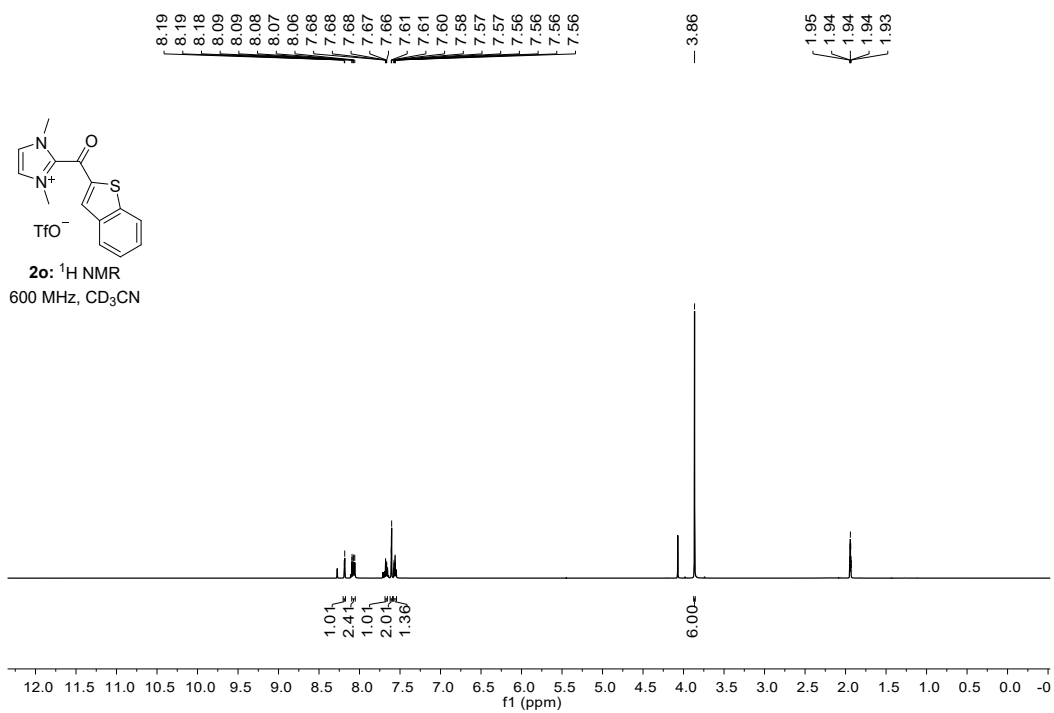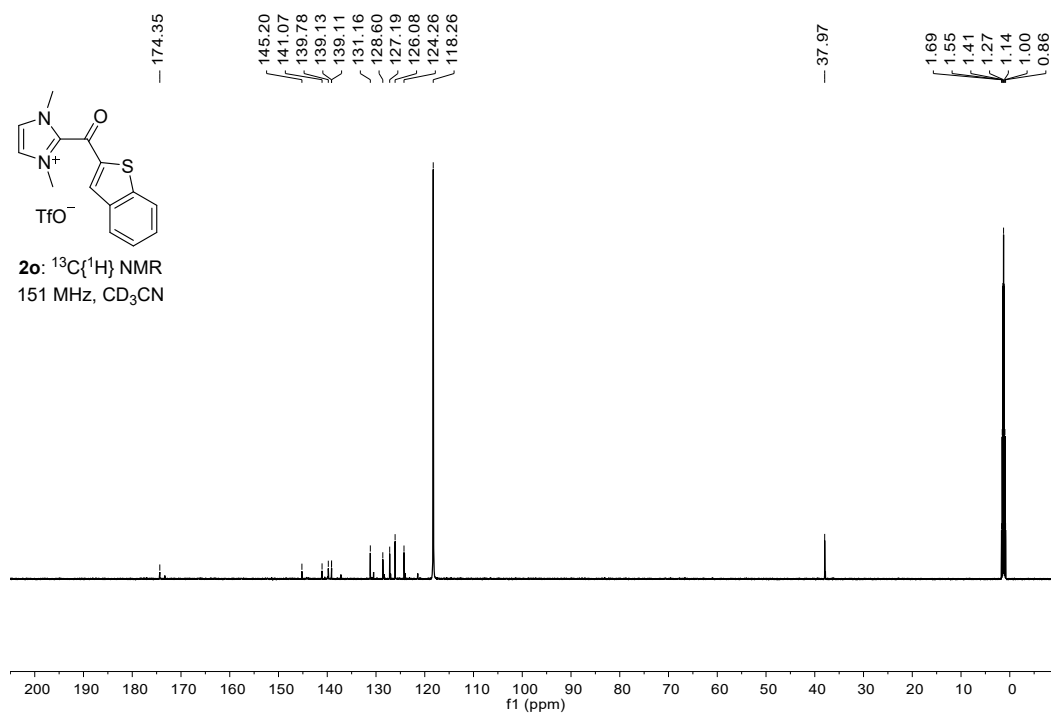

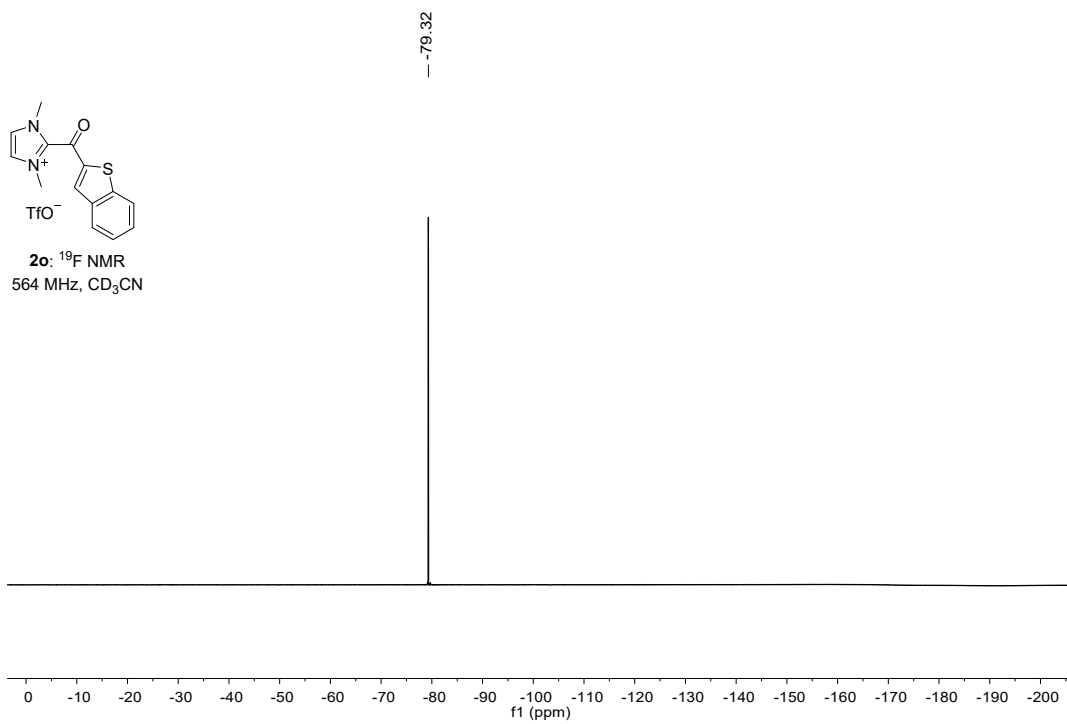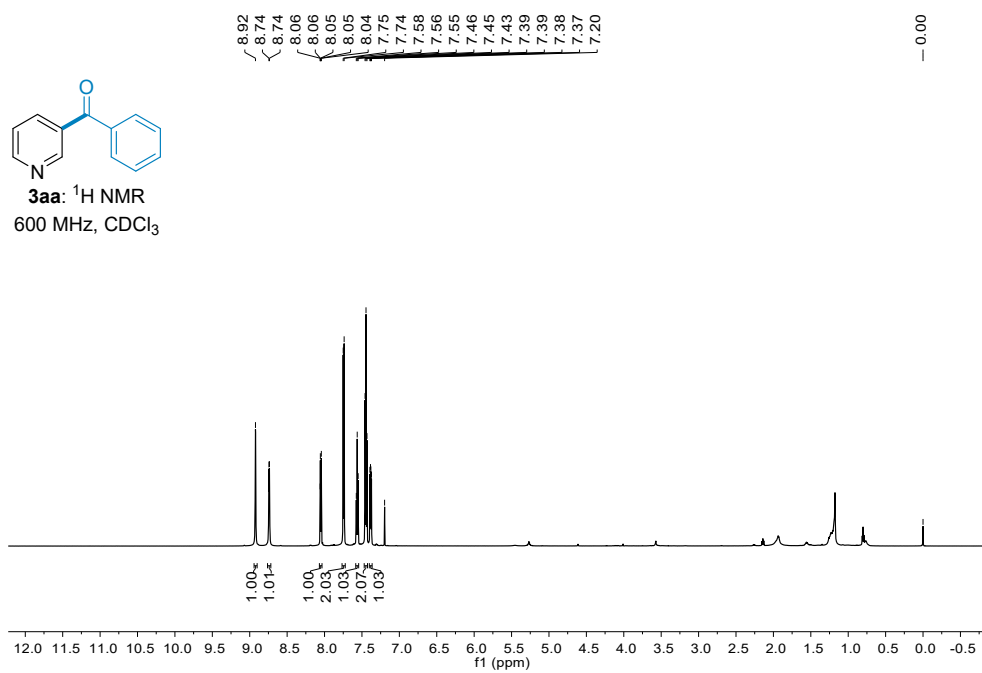

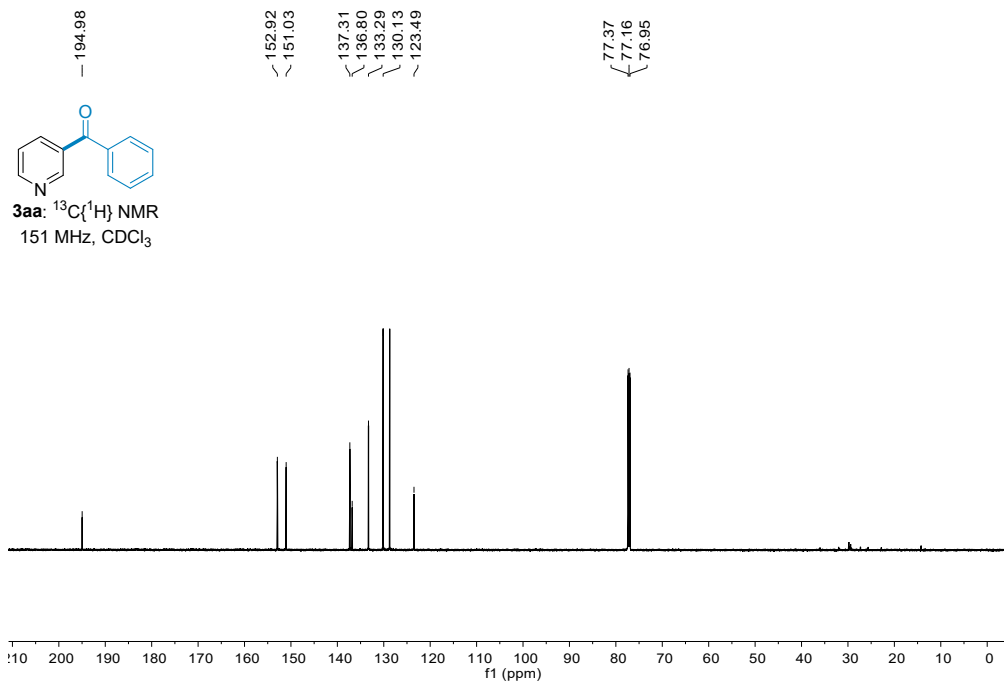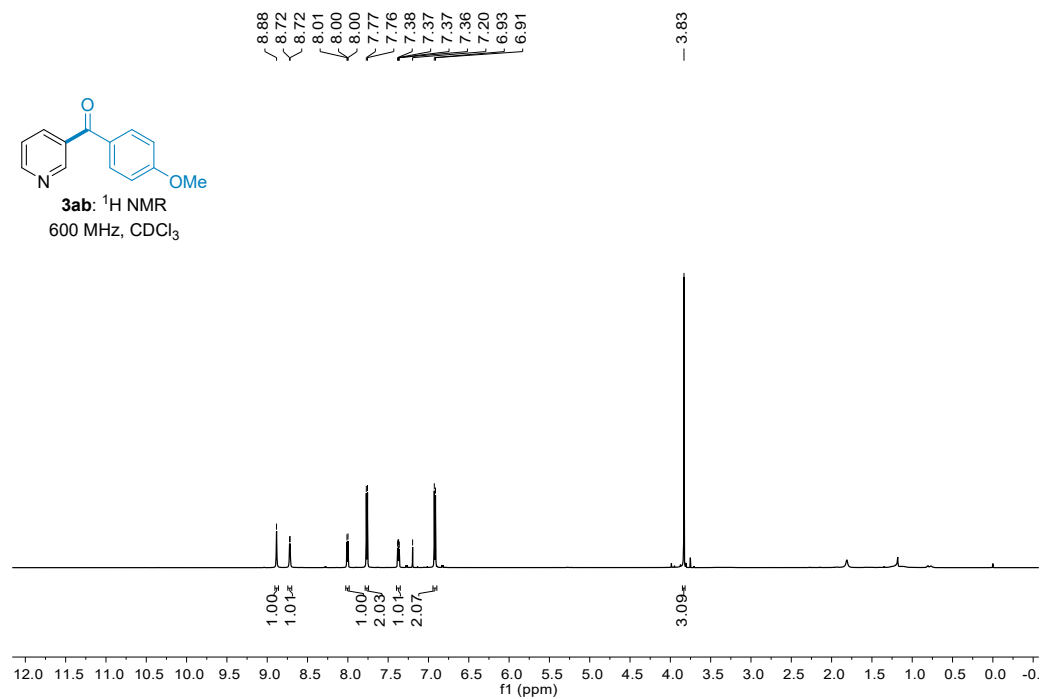

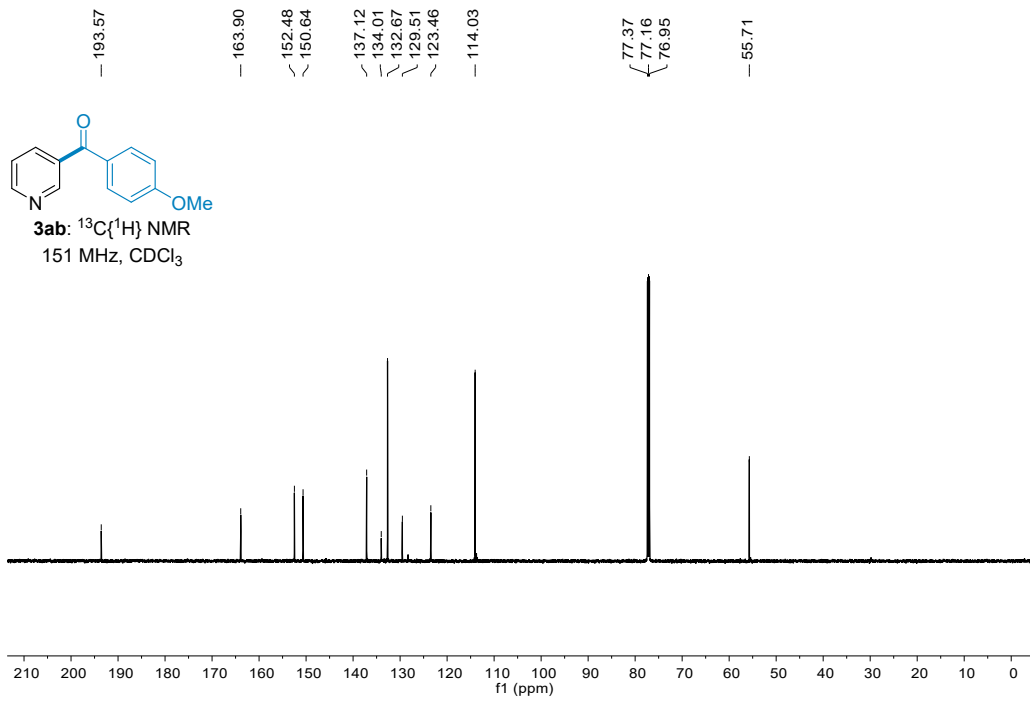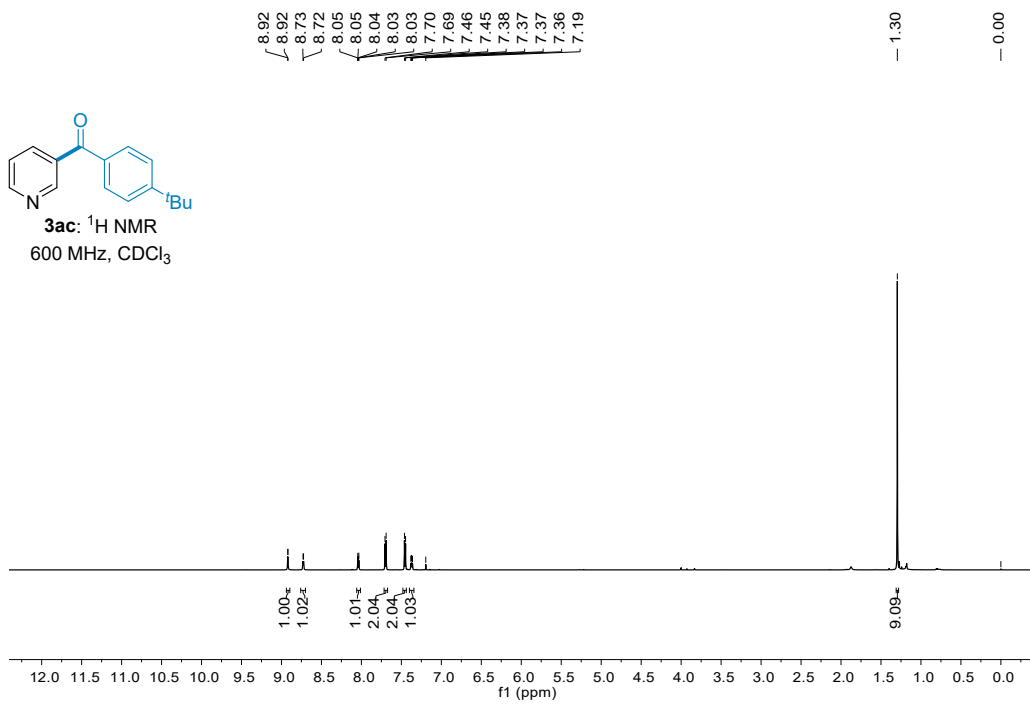

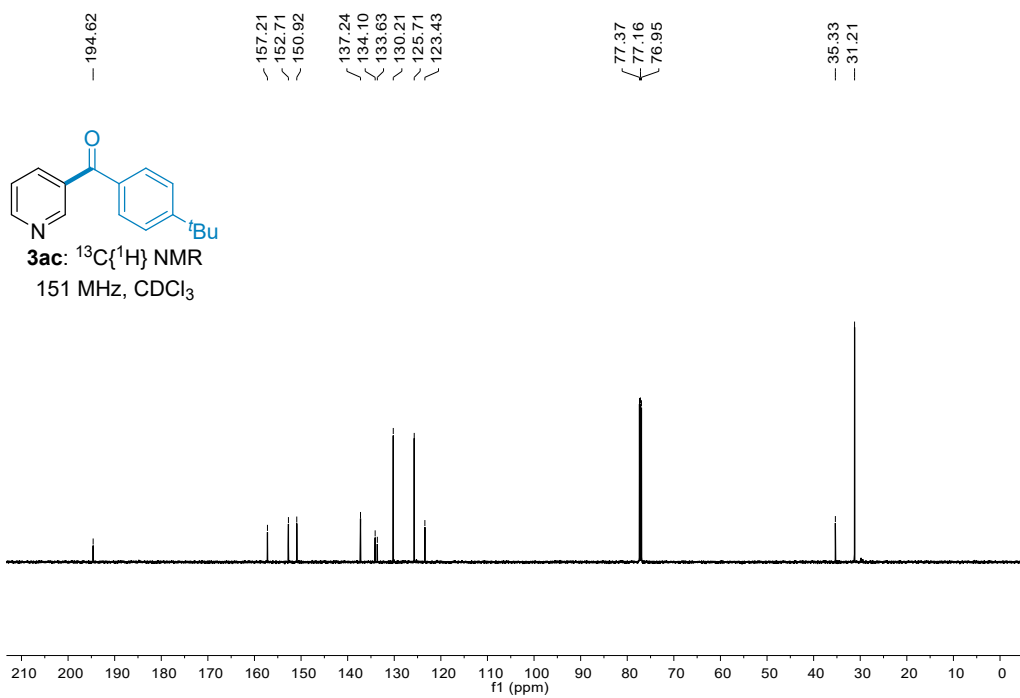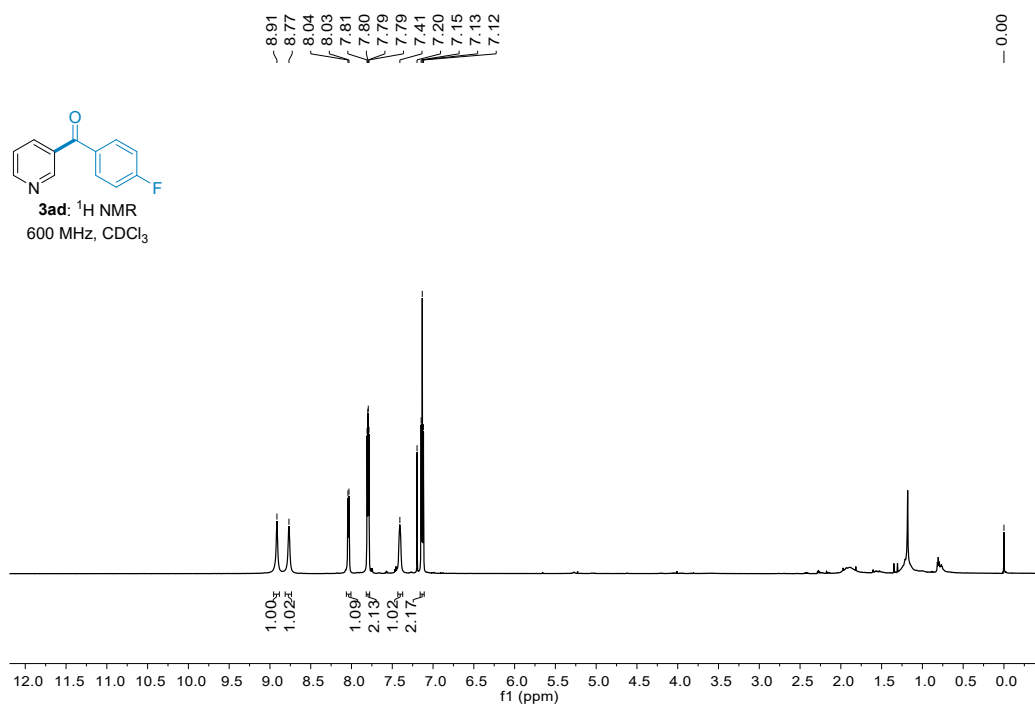

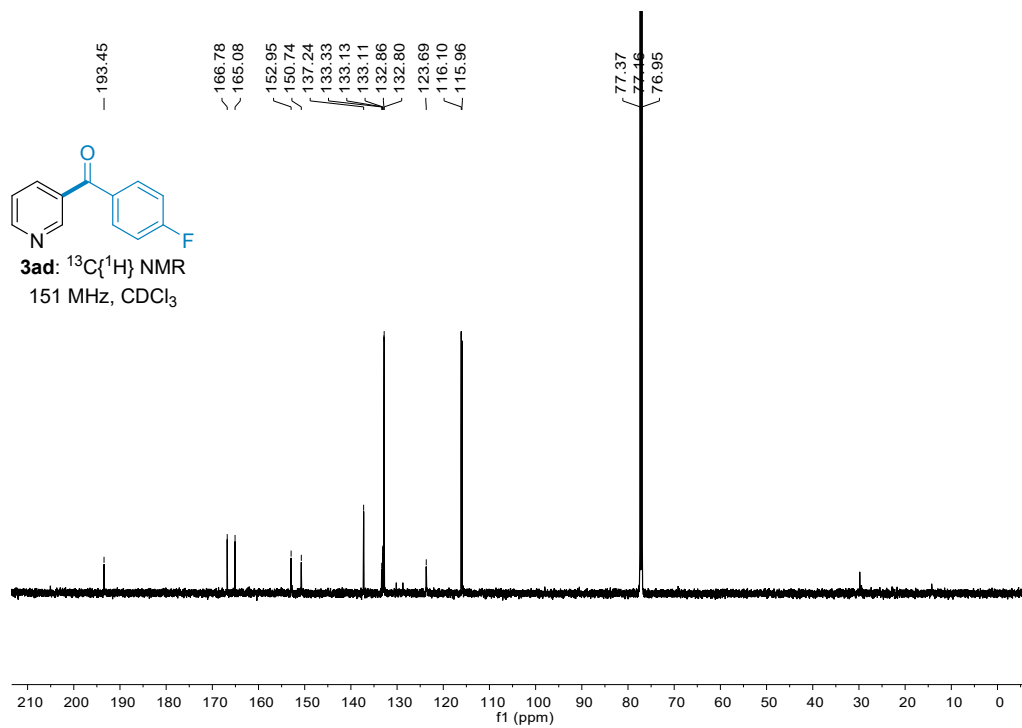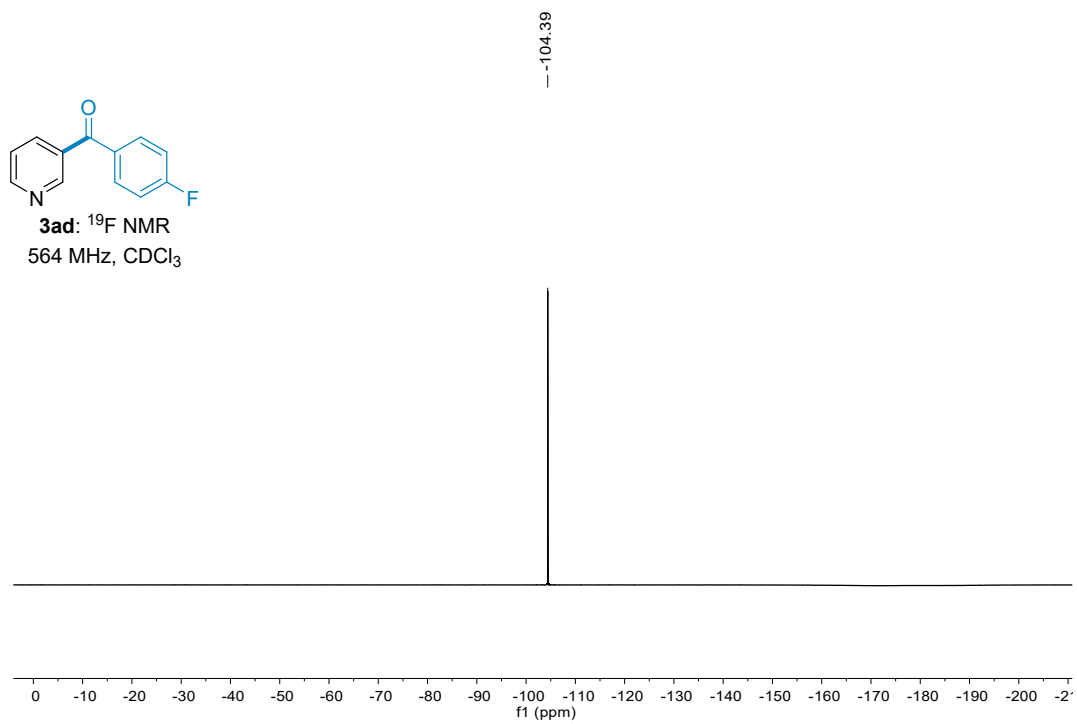

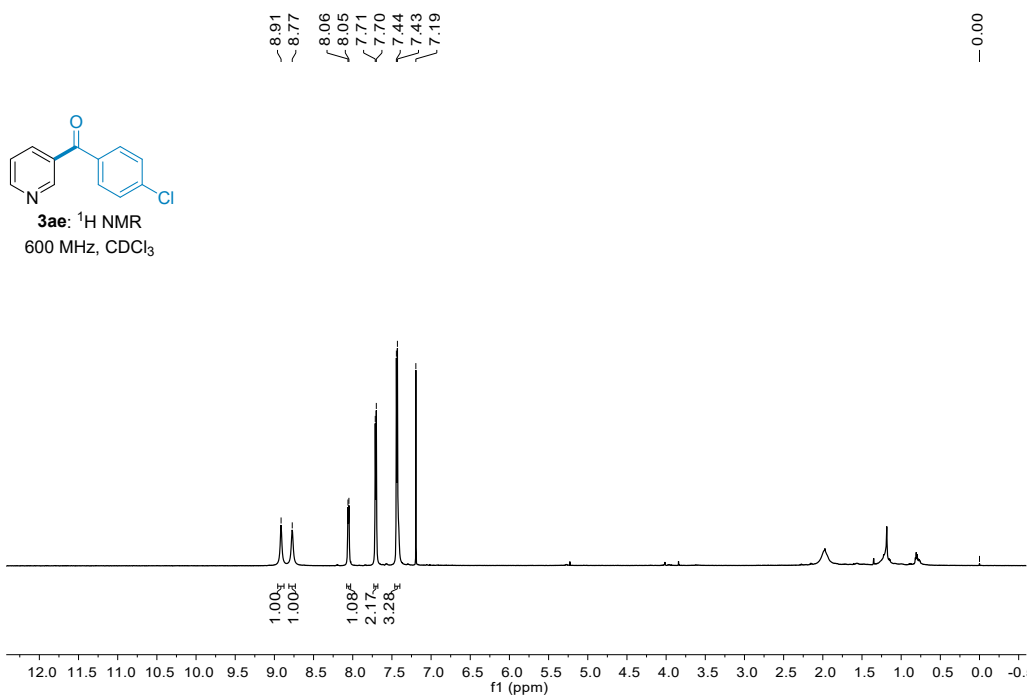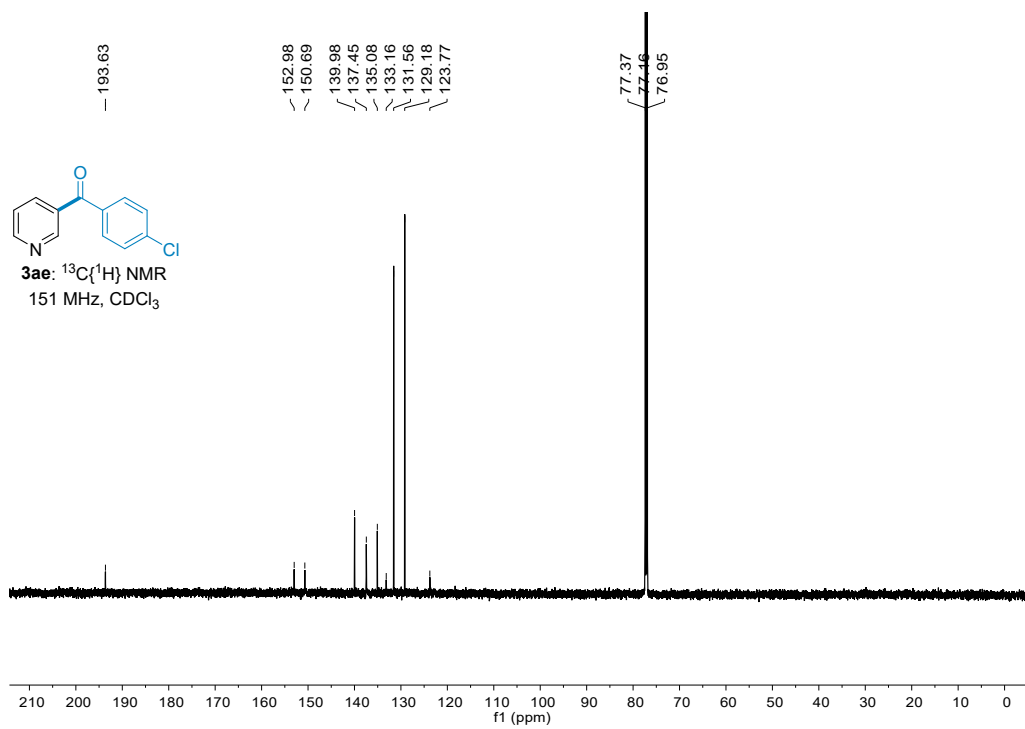

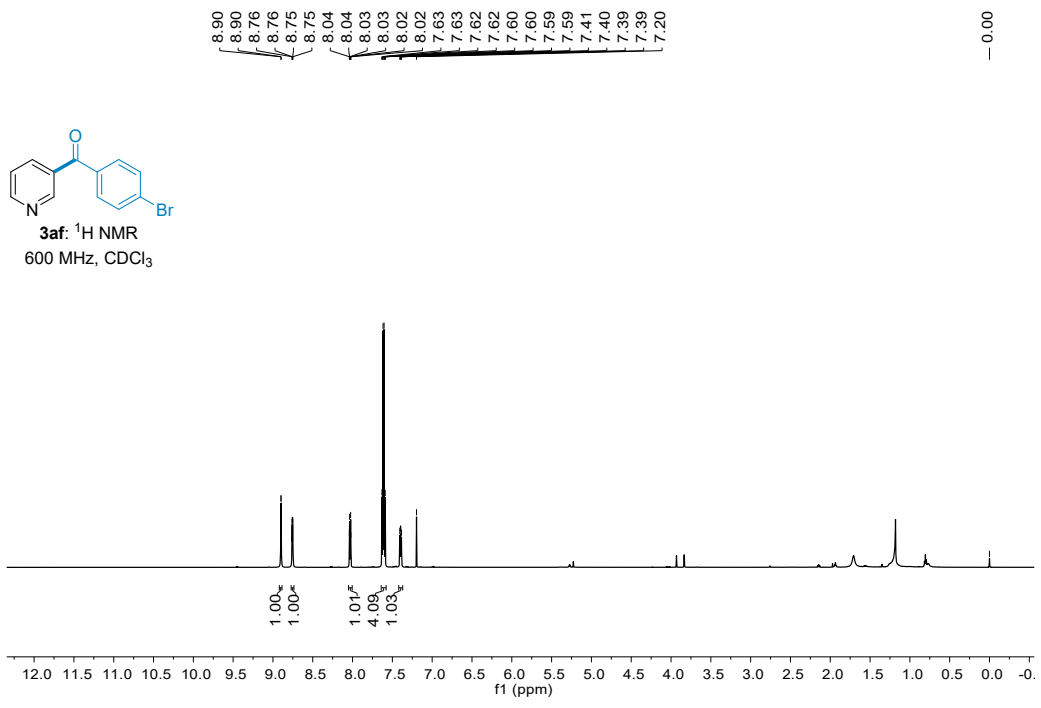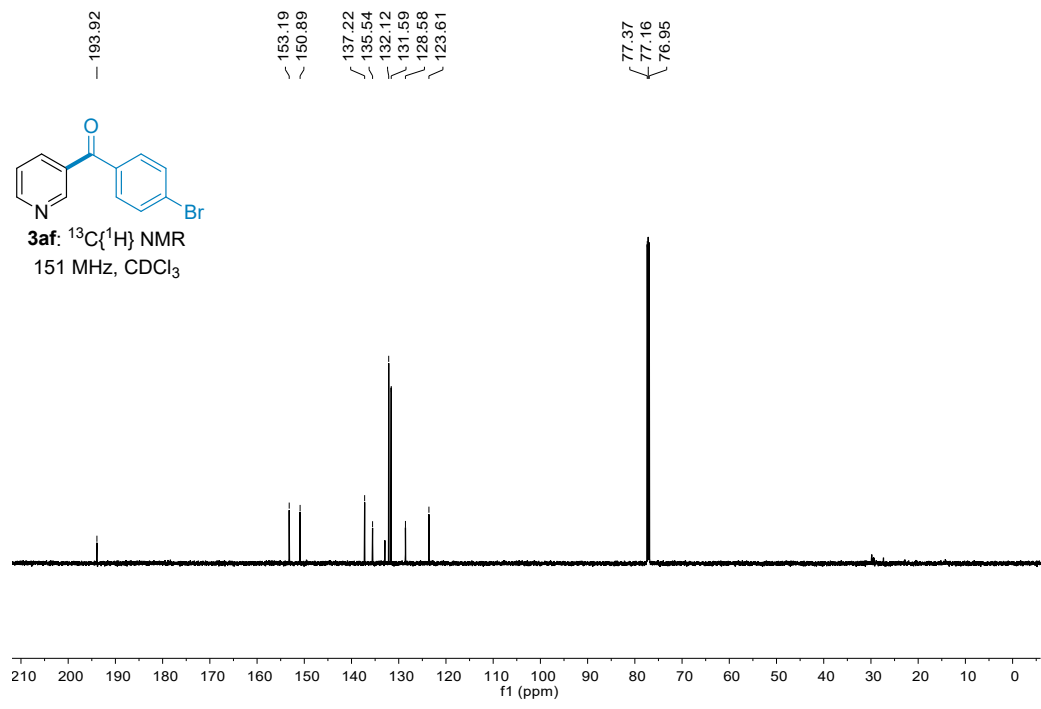

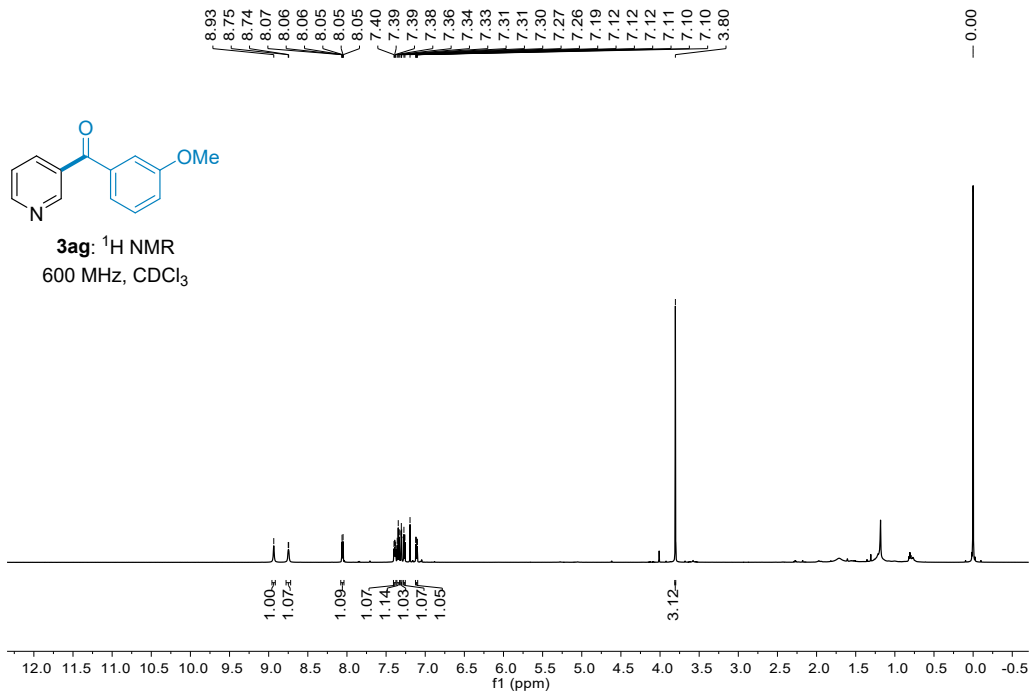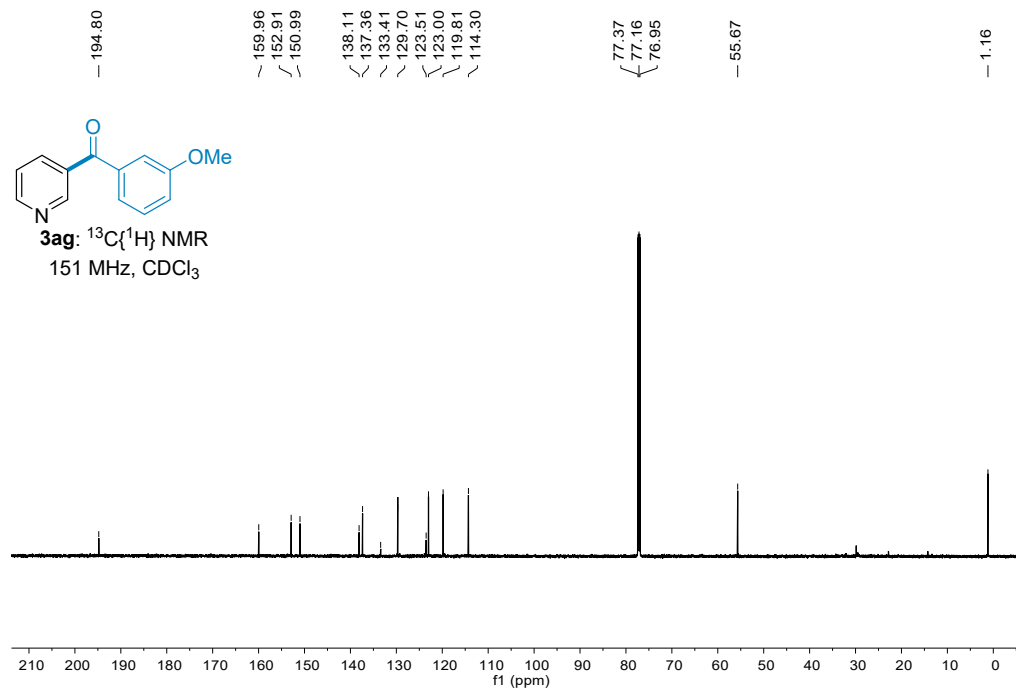

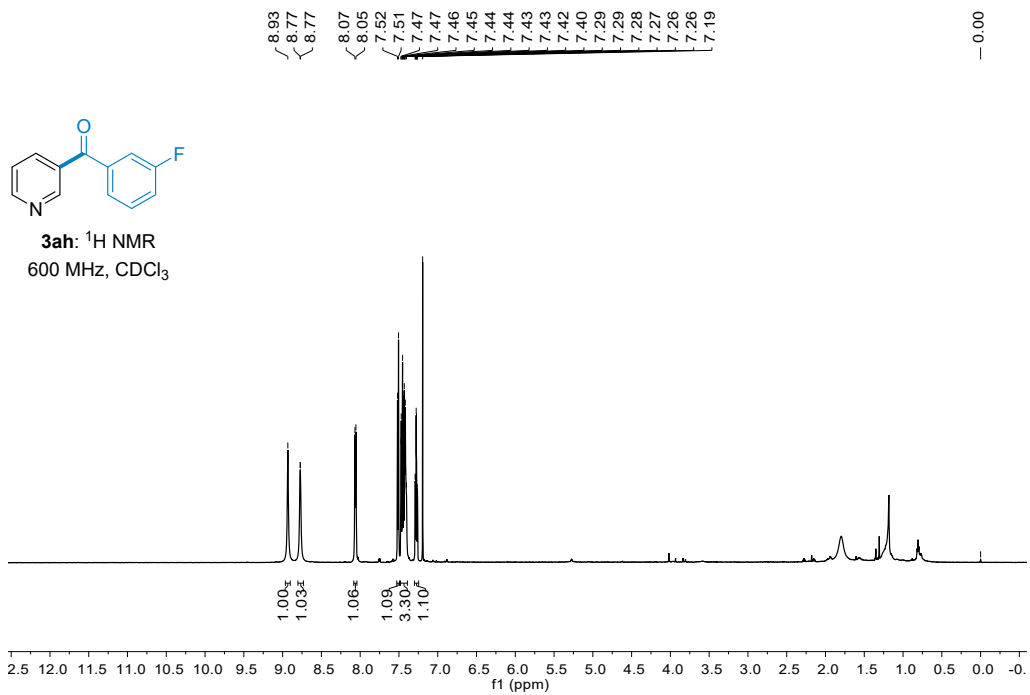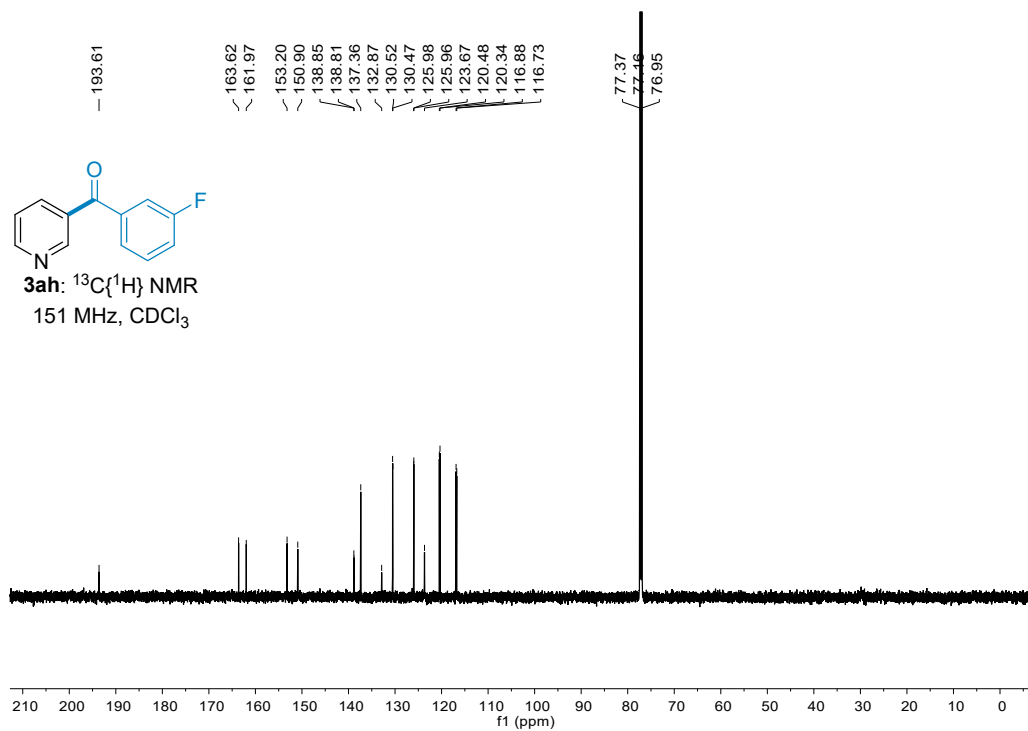

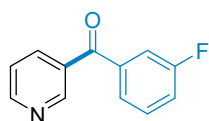

**3ah:**  $^{19}\text{F}$  NMR  
564 MHz,  $\text{CDCl}_3$

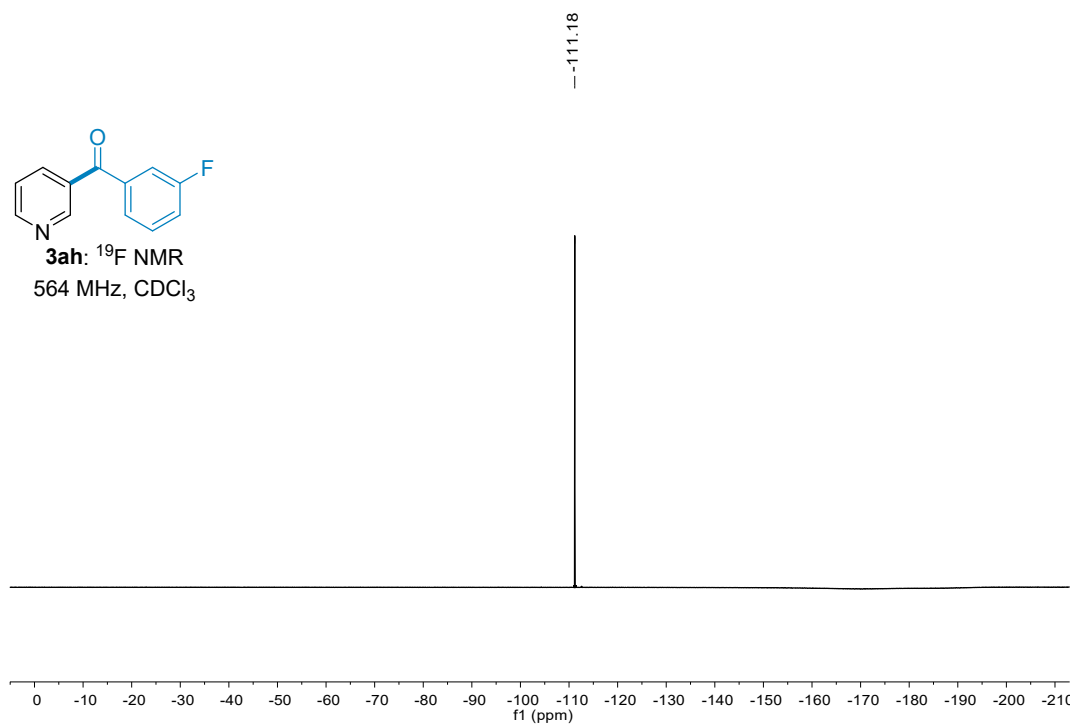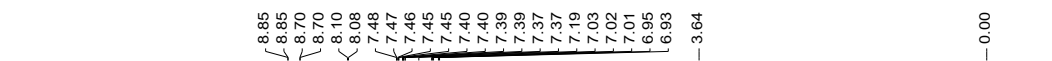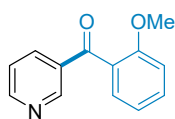

**3ai:**  $^1\text{H}$  NMR  
600 MHz,  $\text{CDCl}_3$

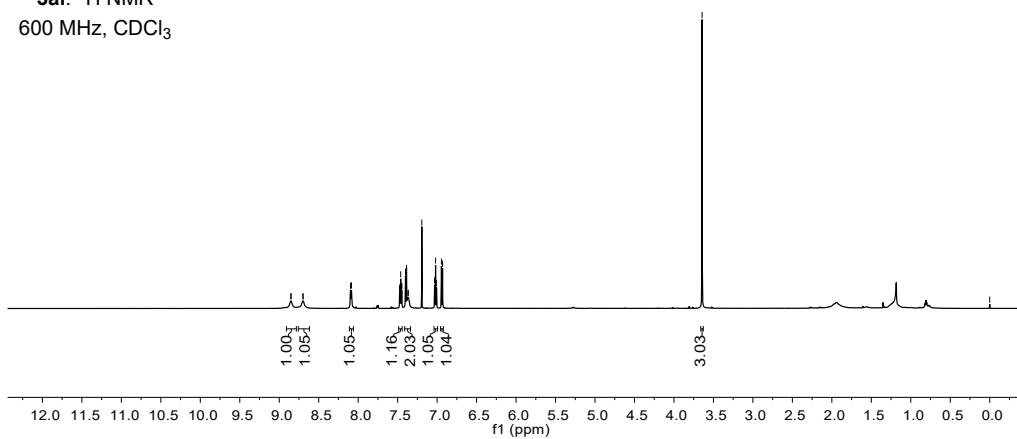

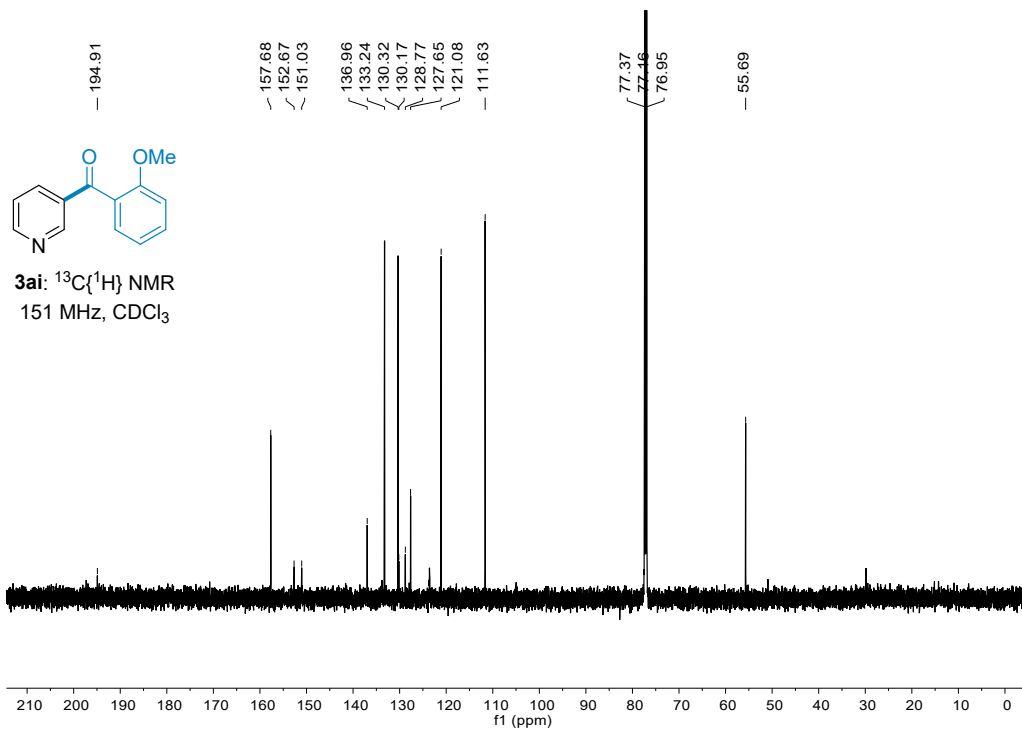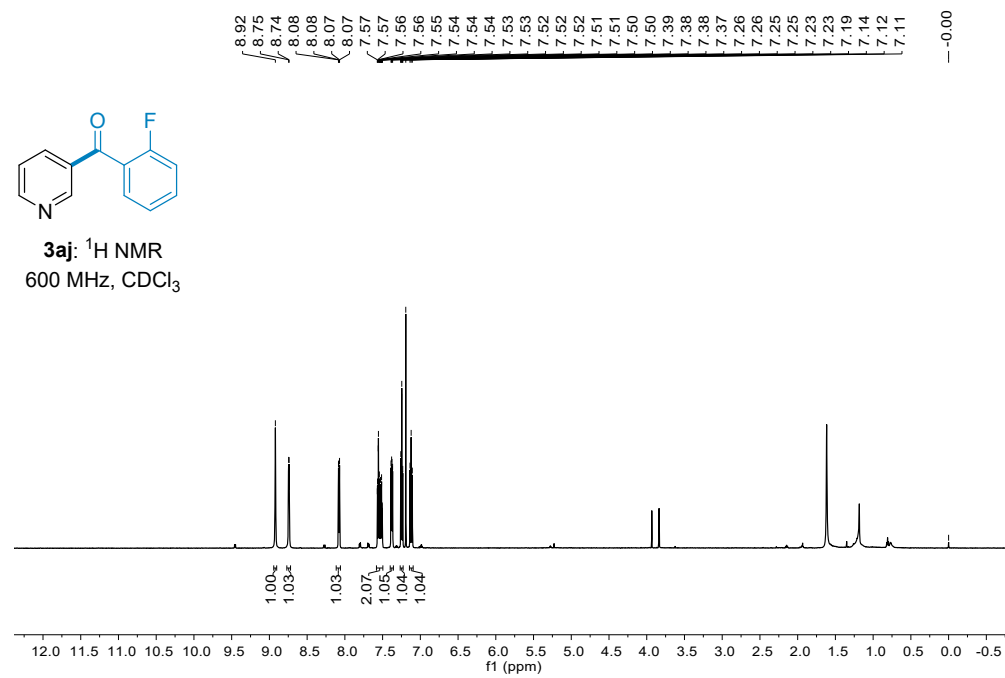

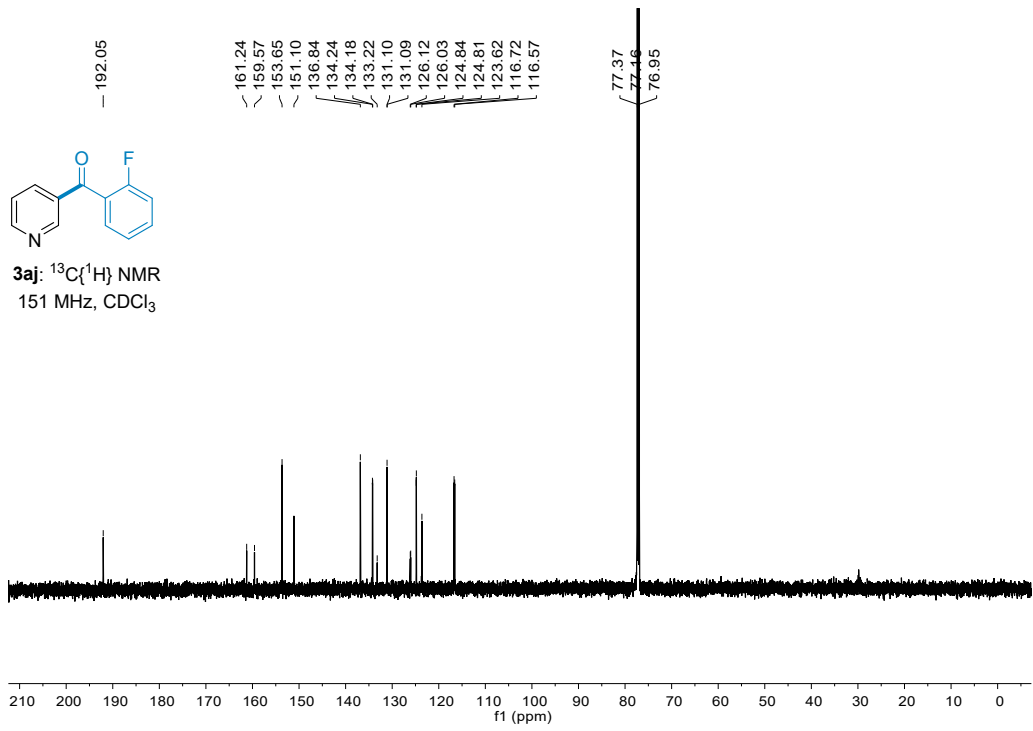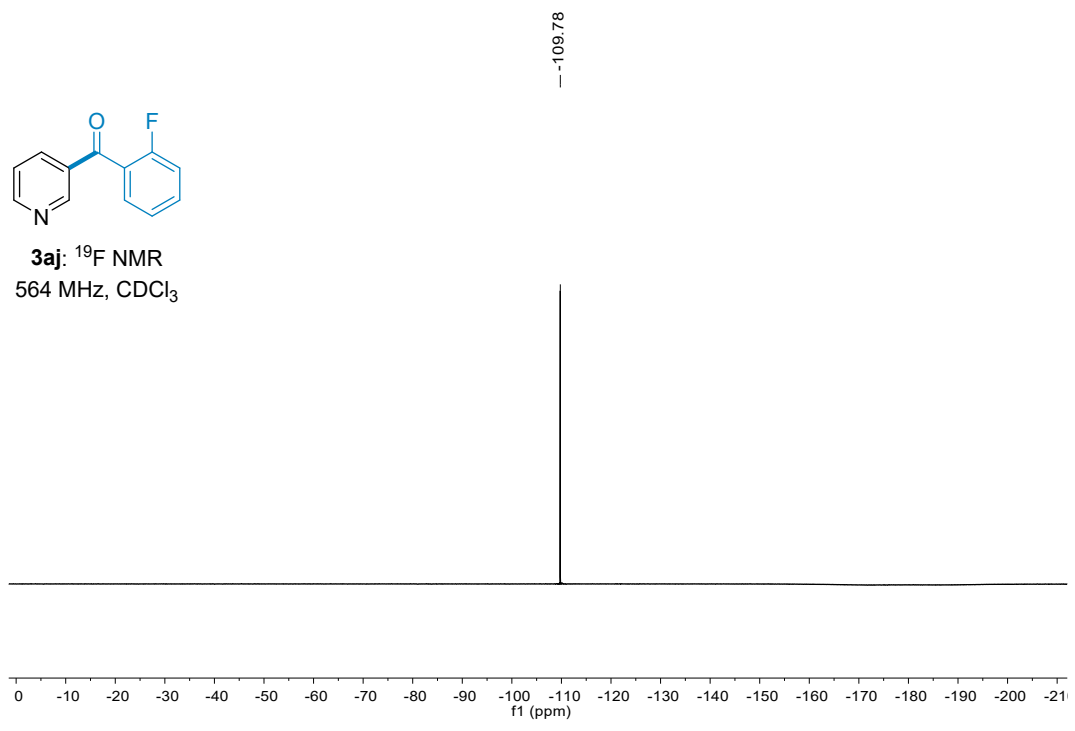

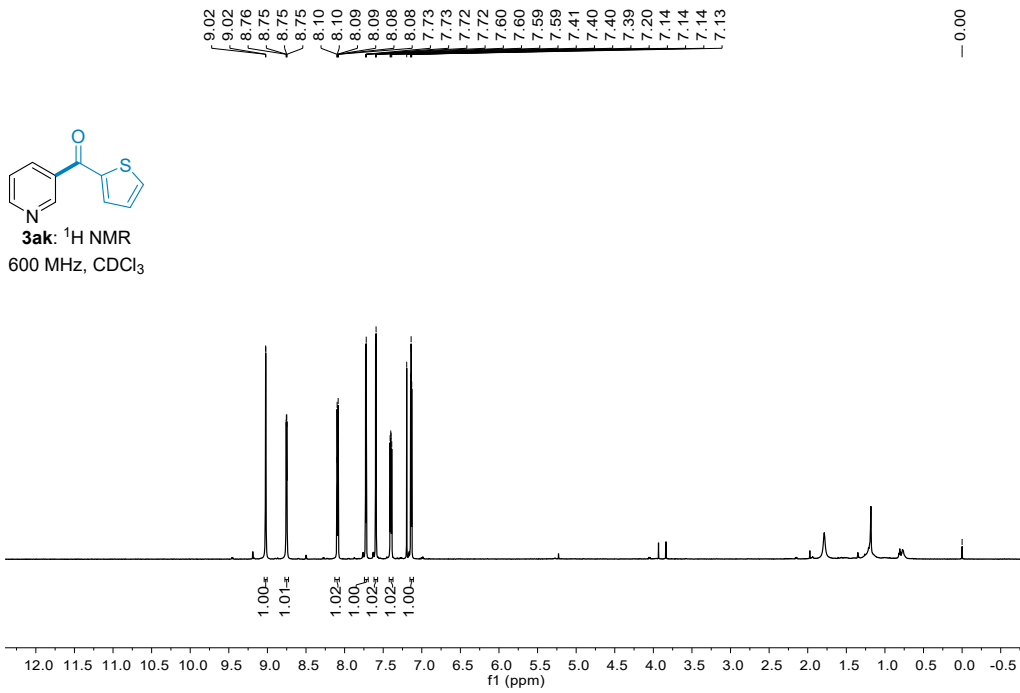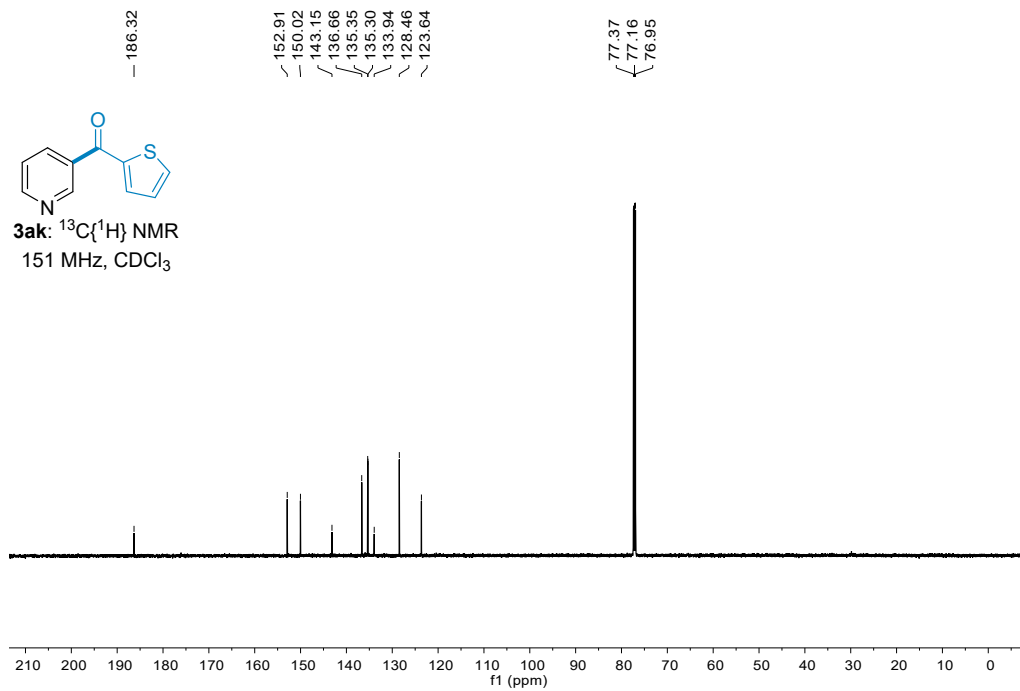

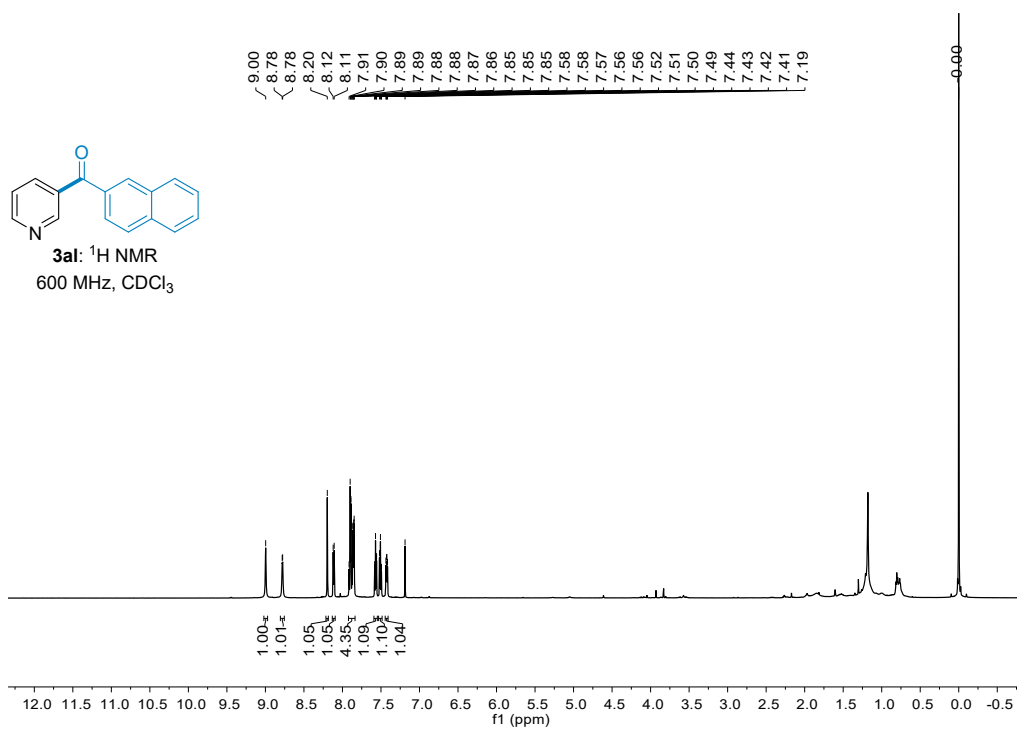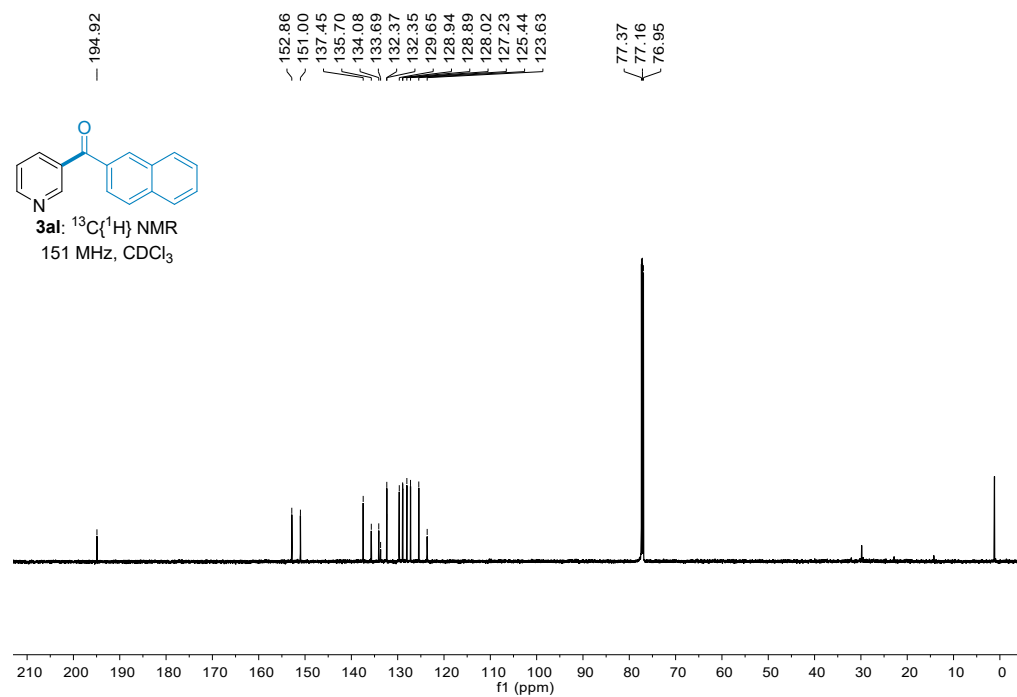

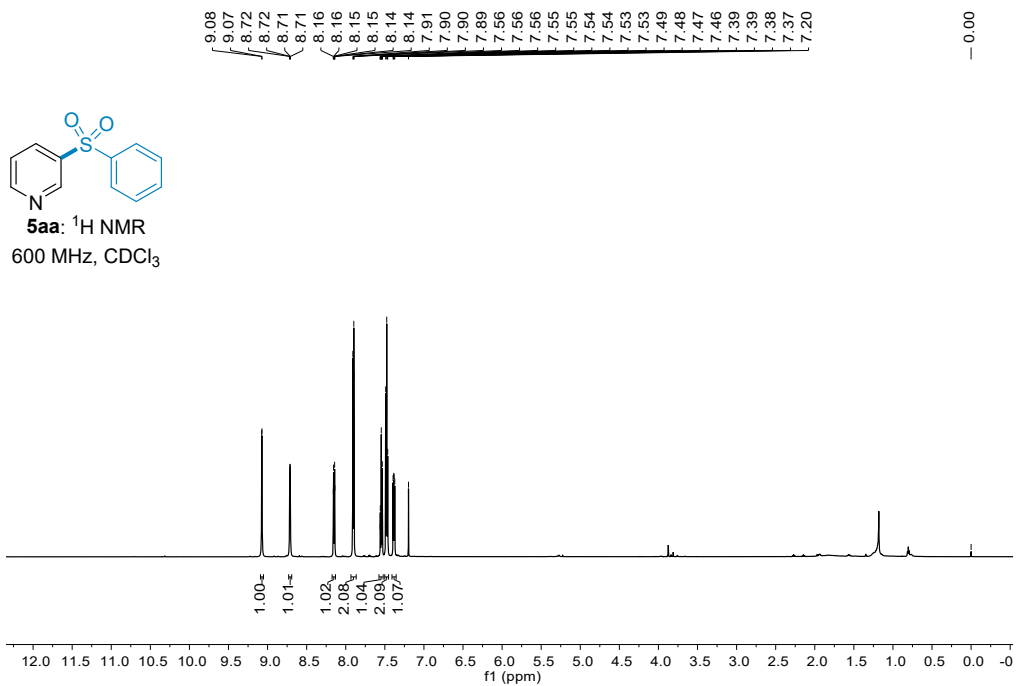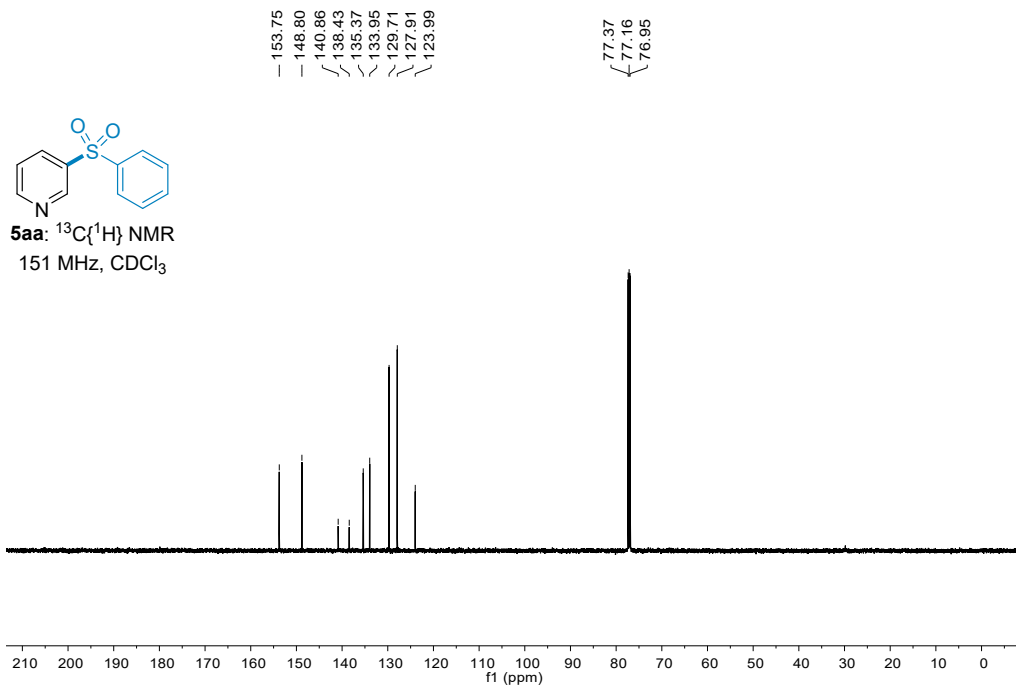

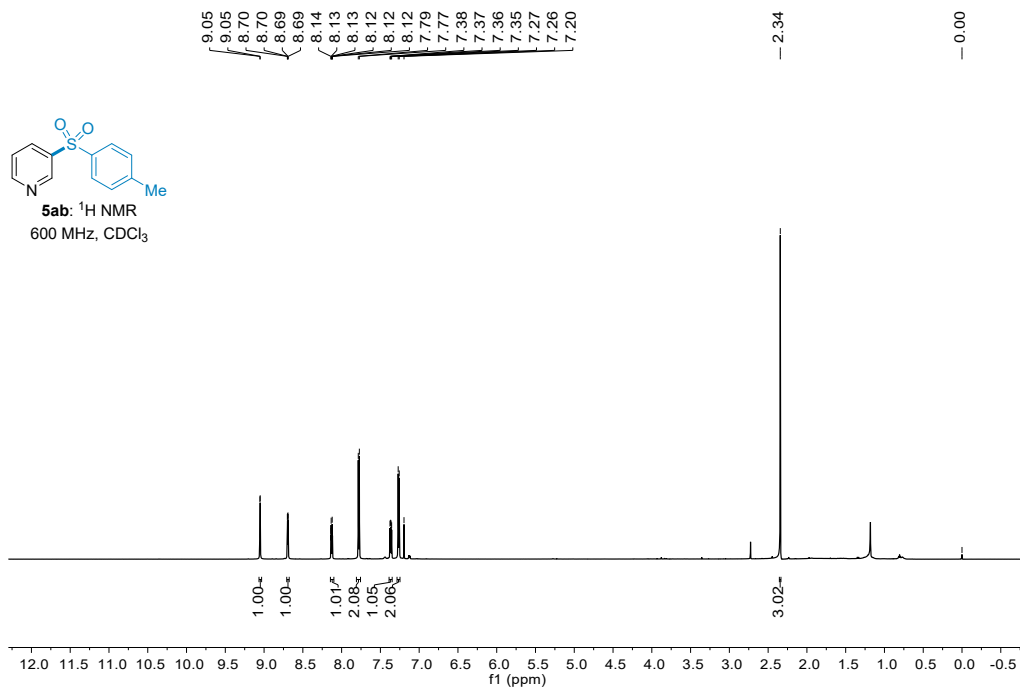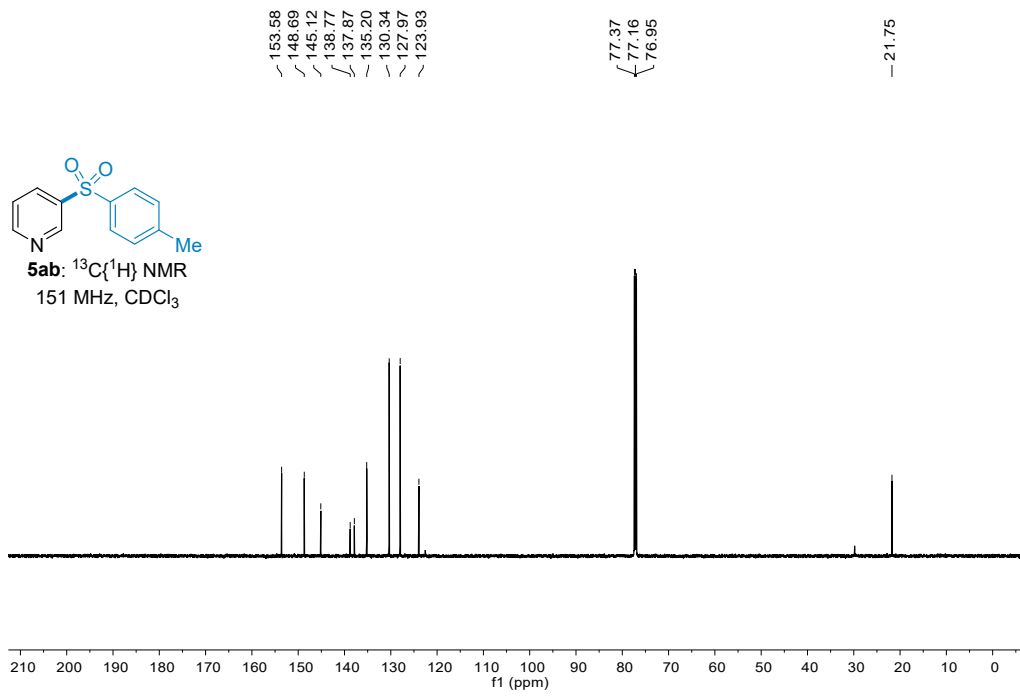

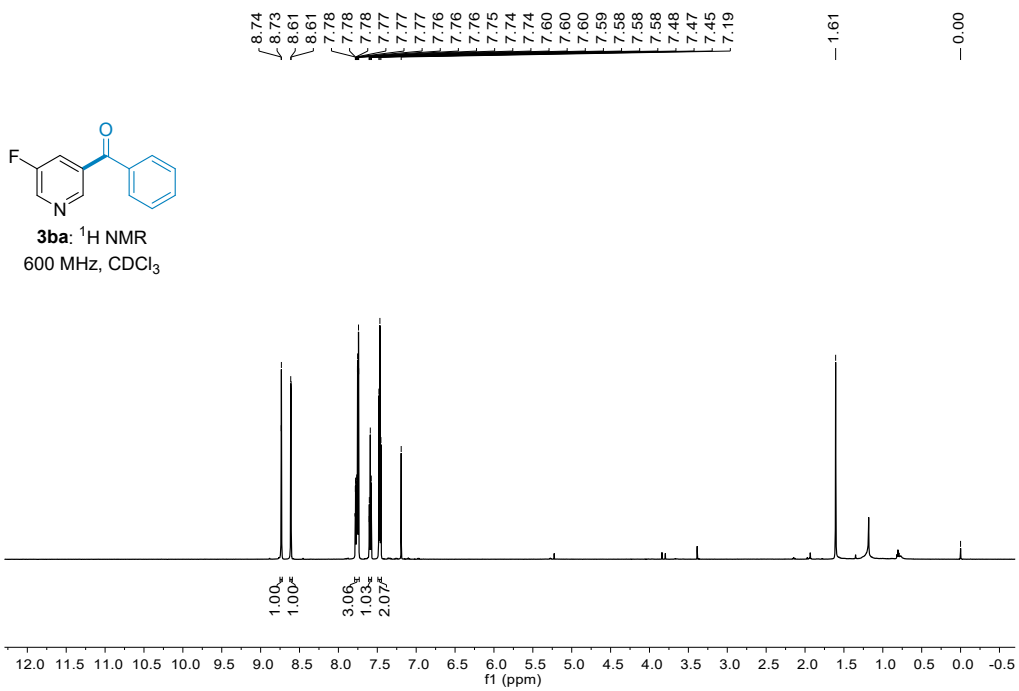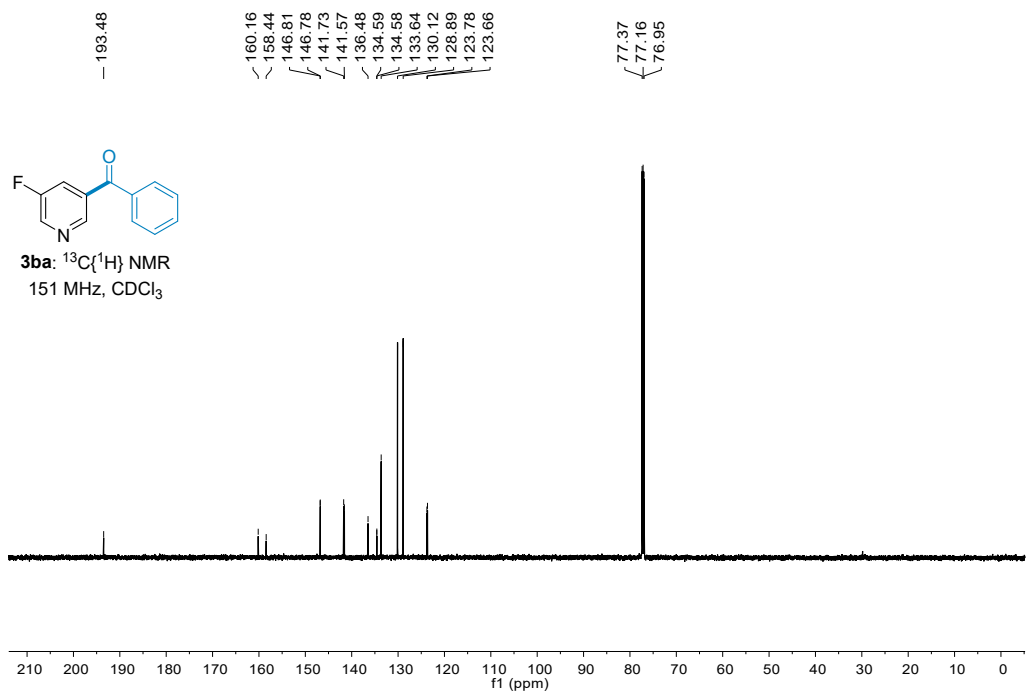

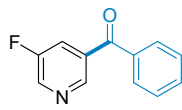

**3ba:**  $^{19}\text{F}$  NMR  
564 MHz,  $\text{CDCl}_3$

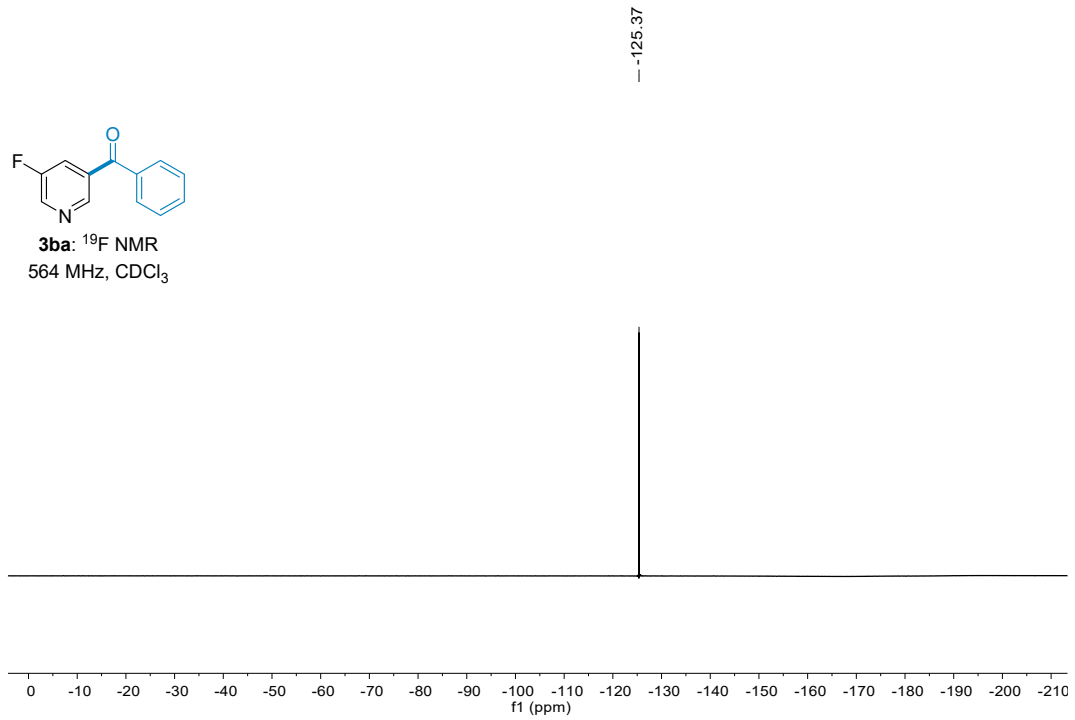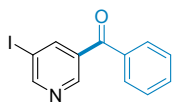

**3ca:**  $^1\text{H}$  NMR  
600 MHz,  $\text{CDCl}_3$

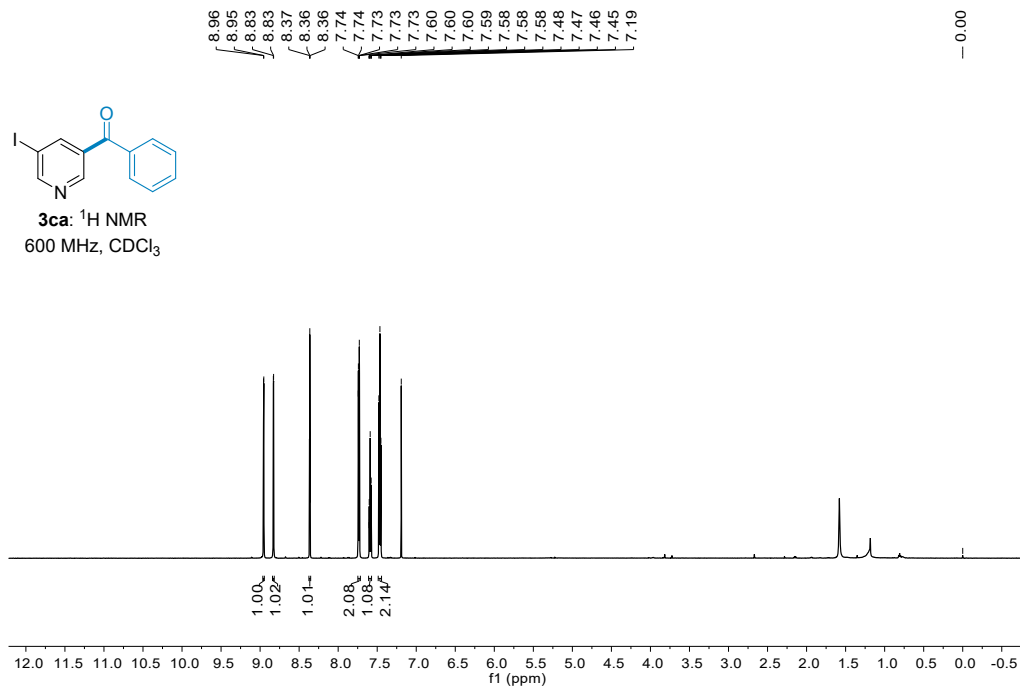

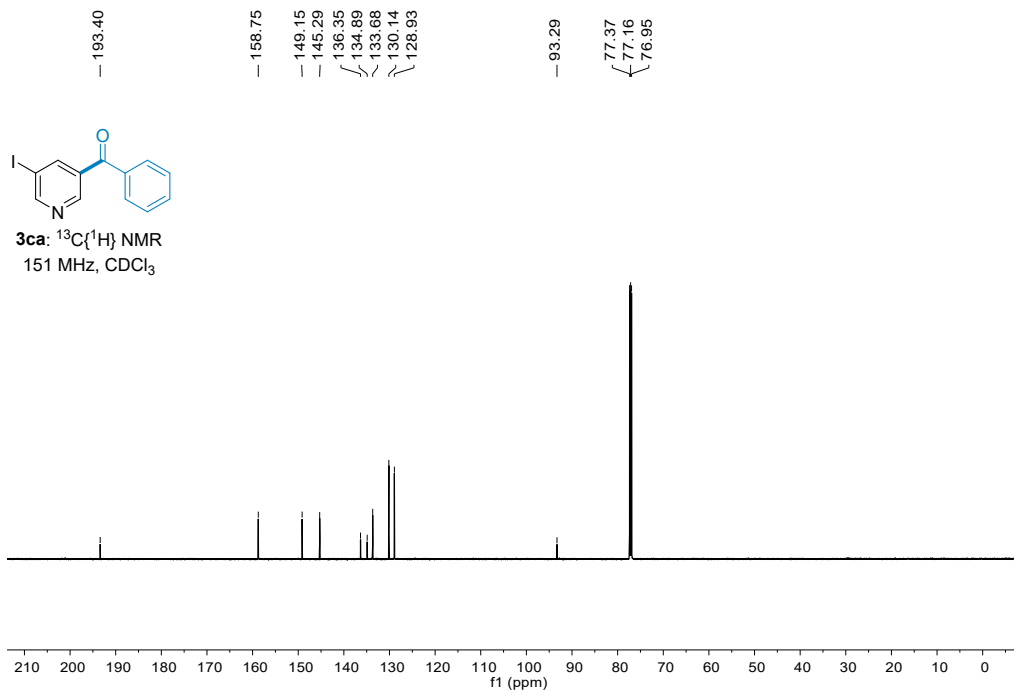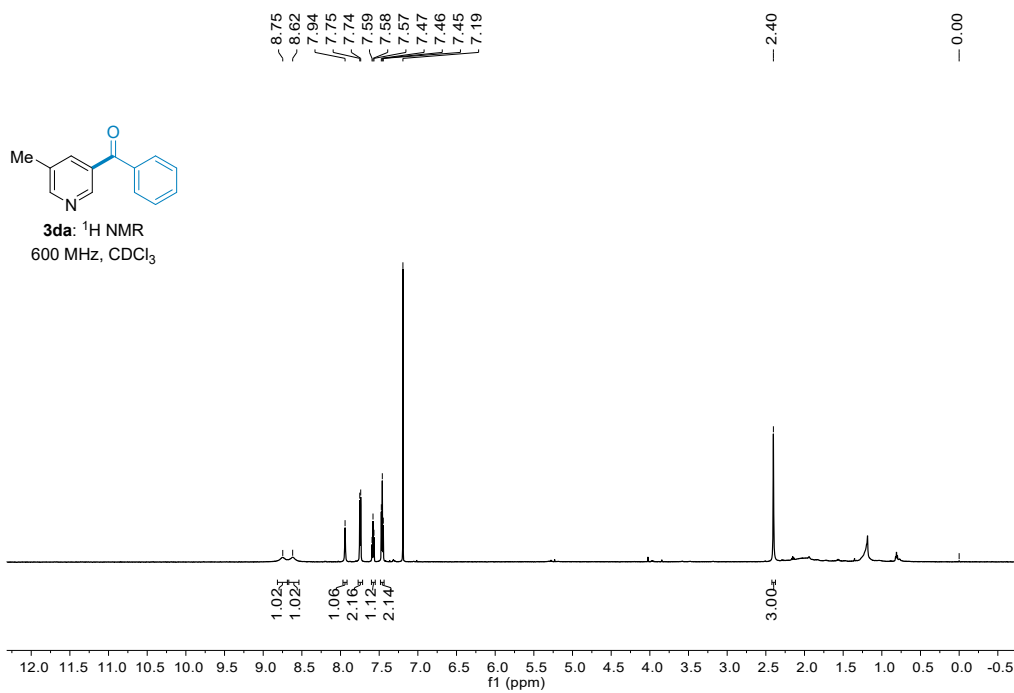

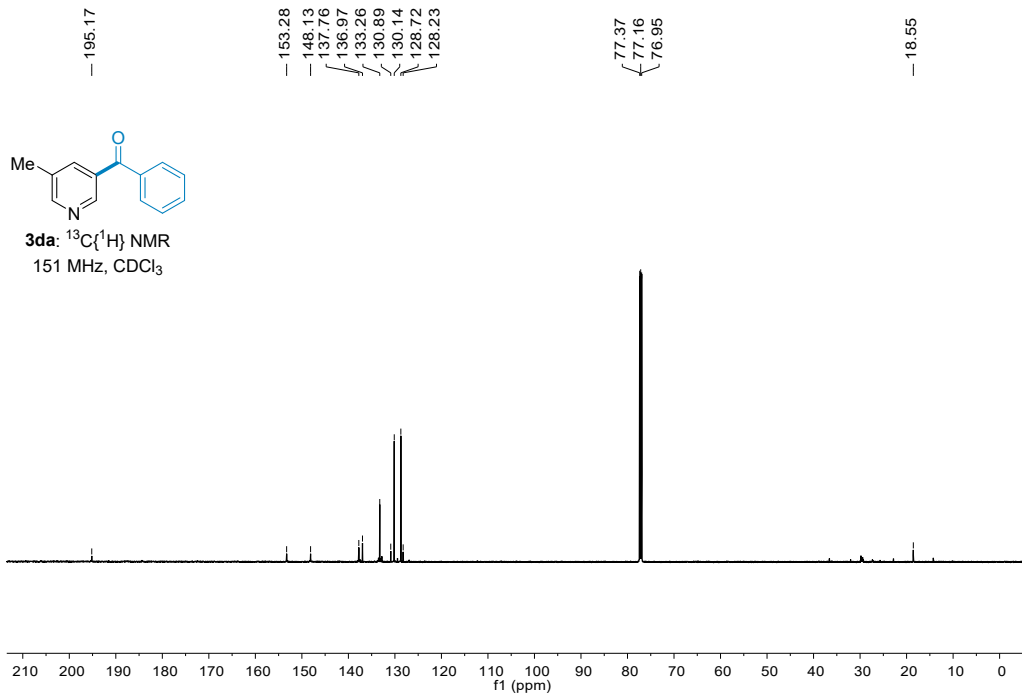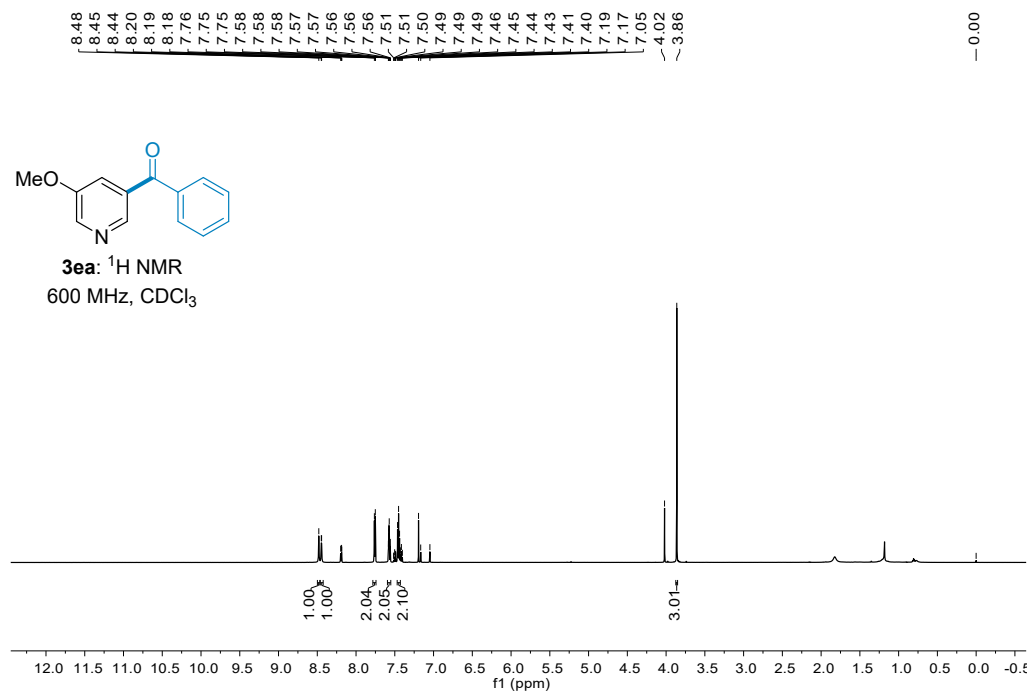

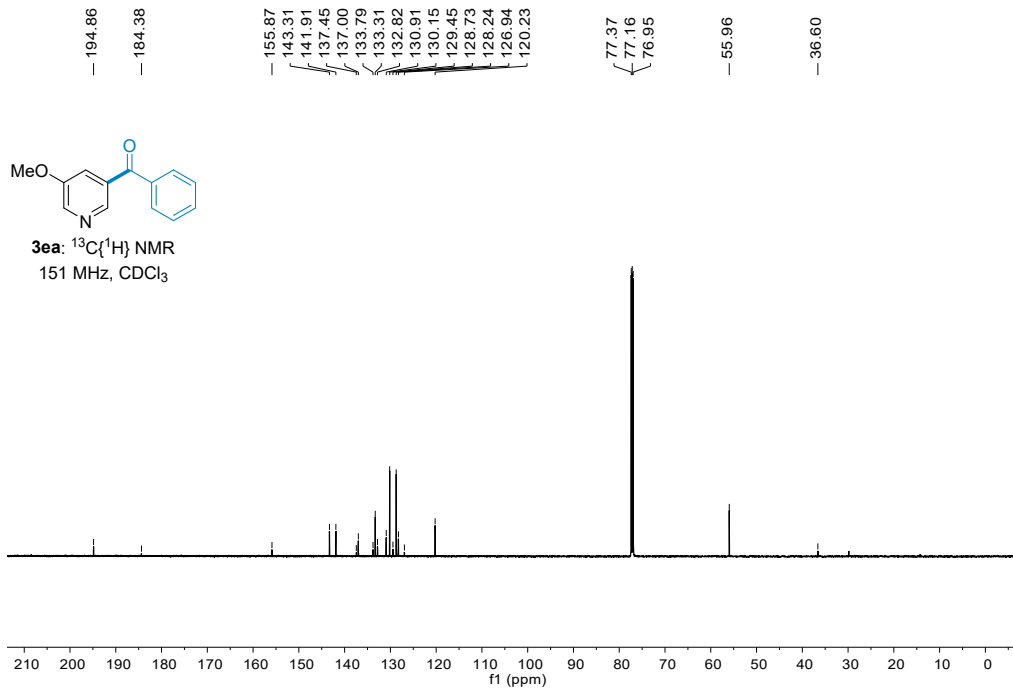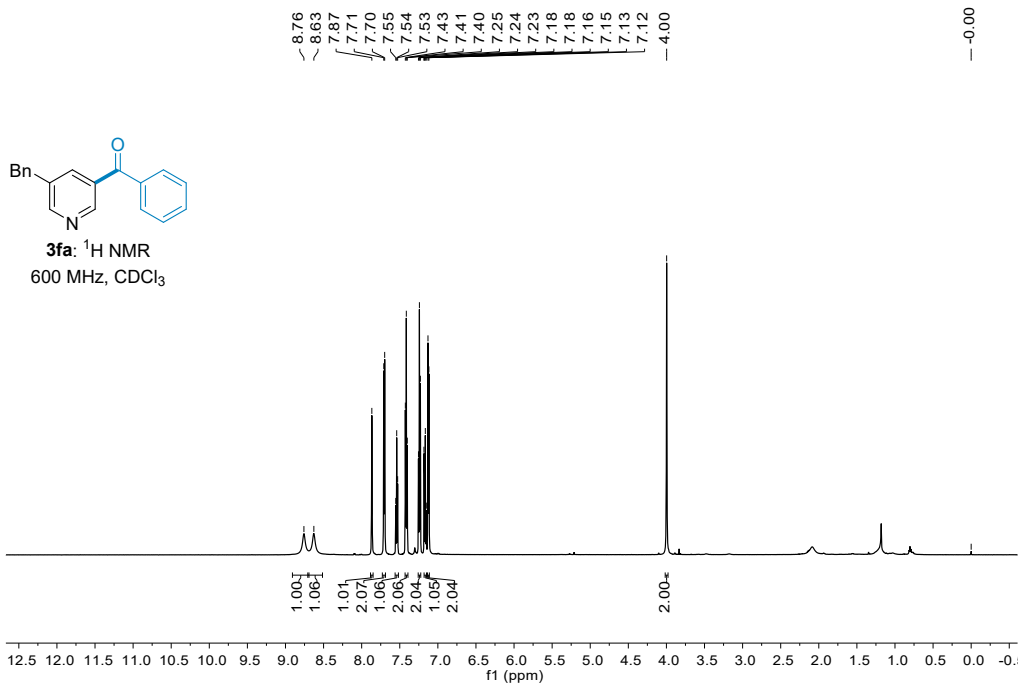

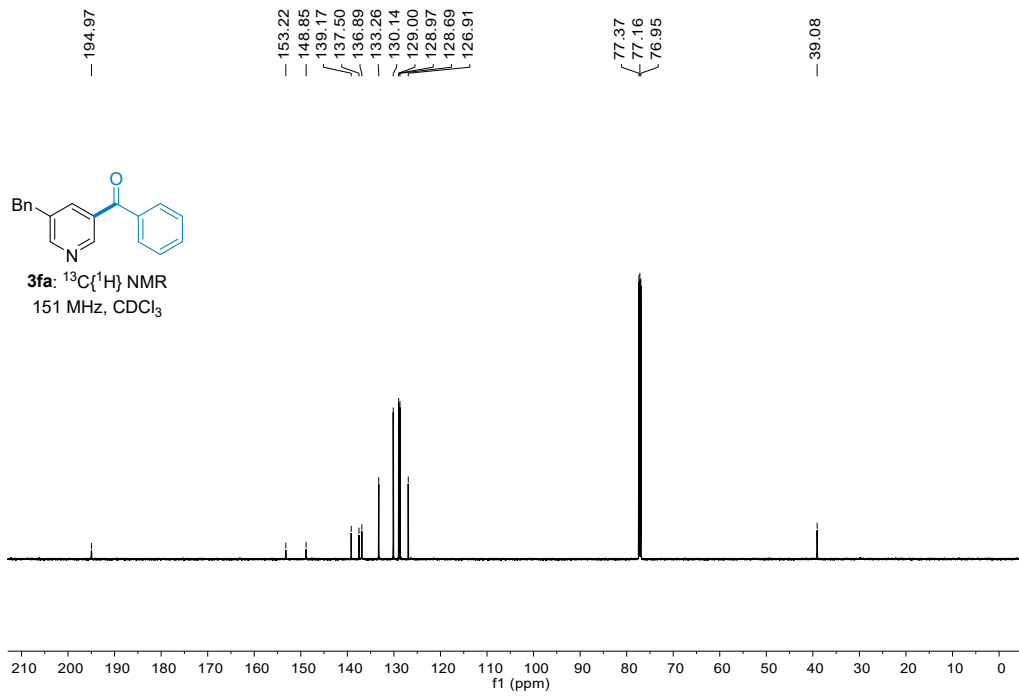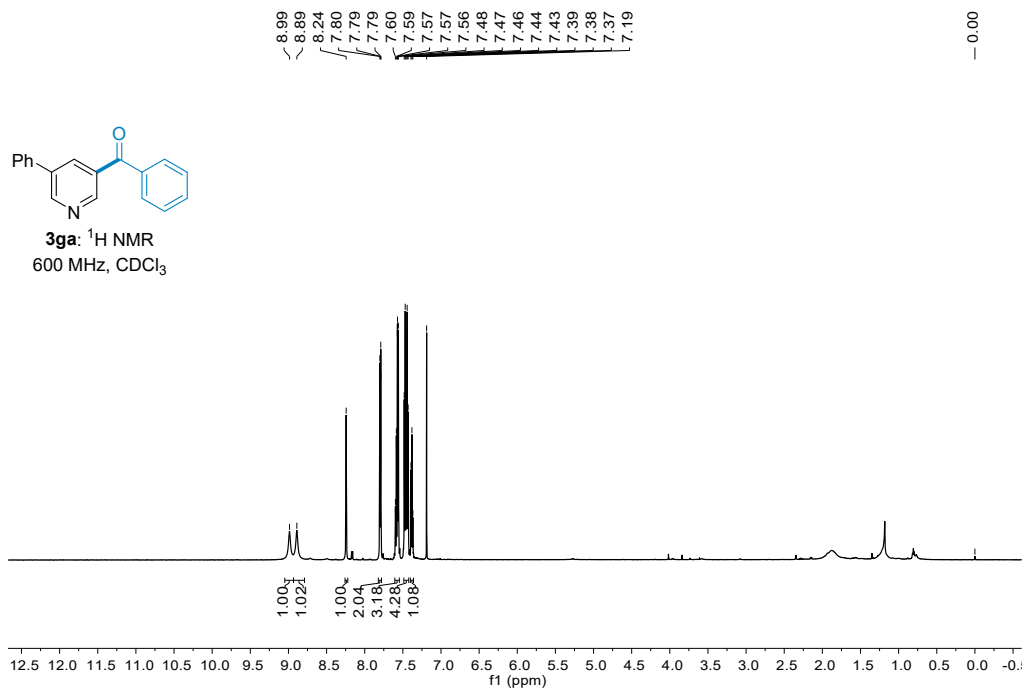

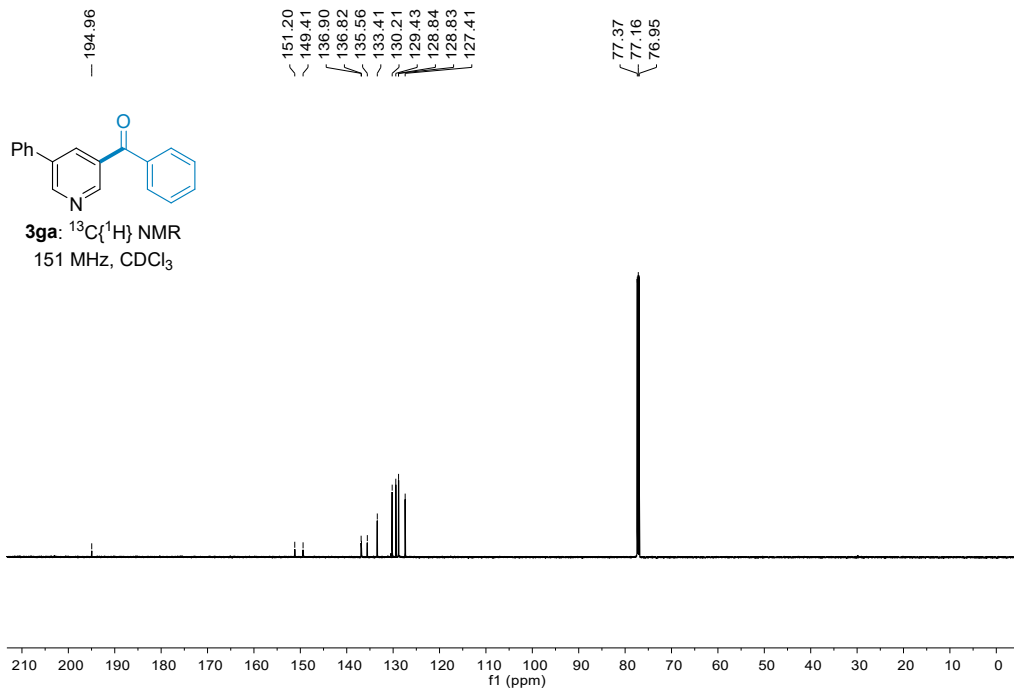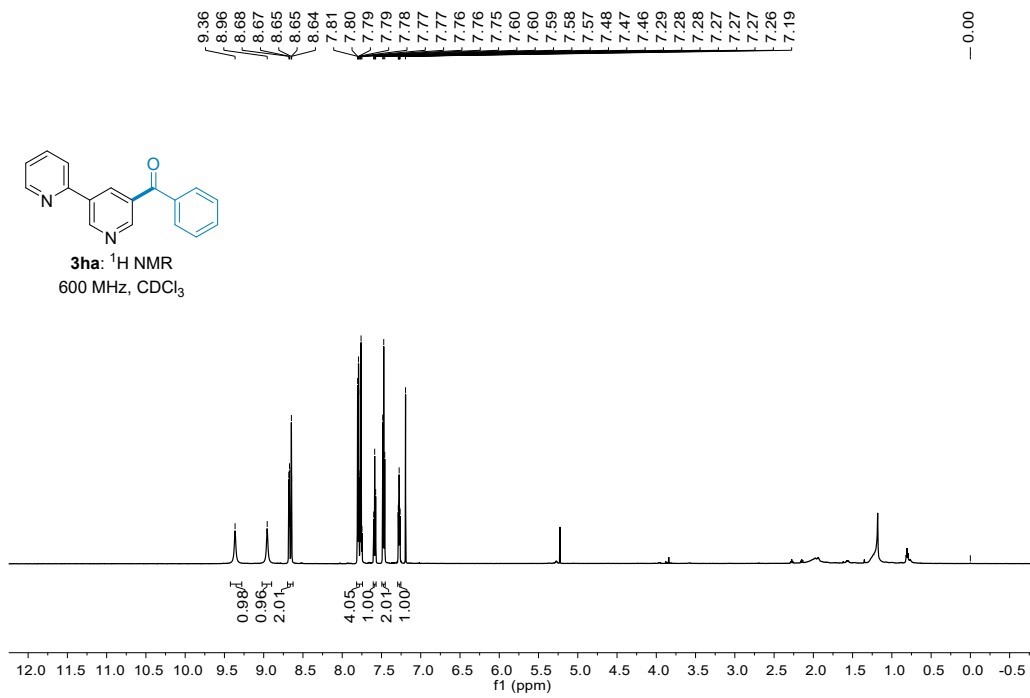

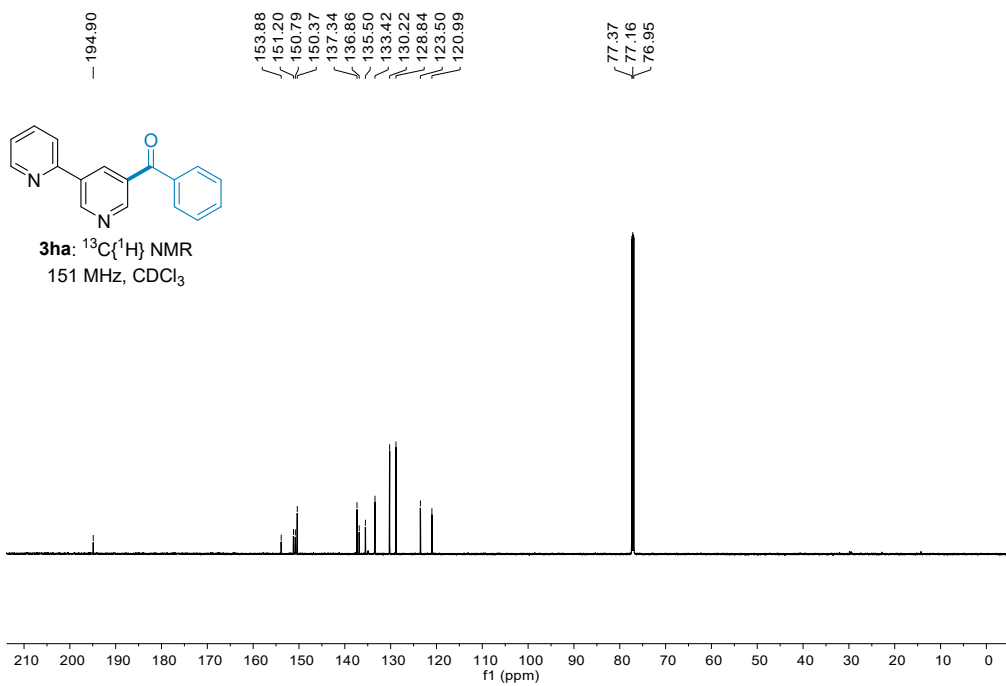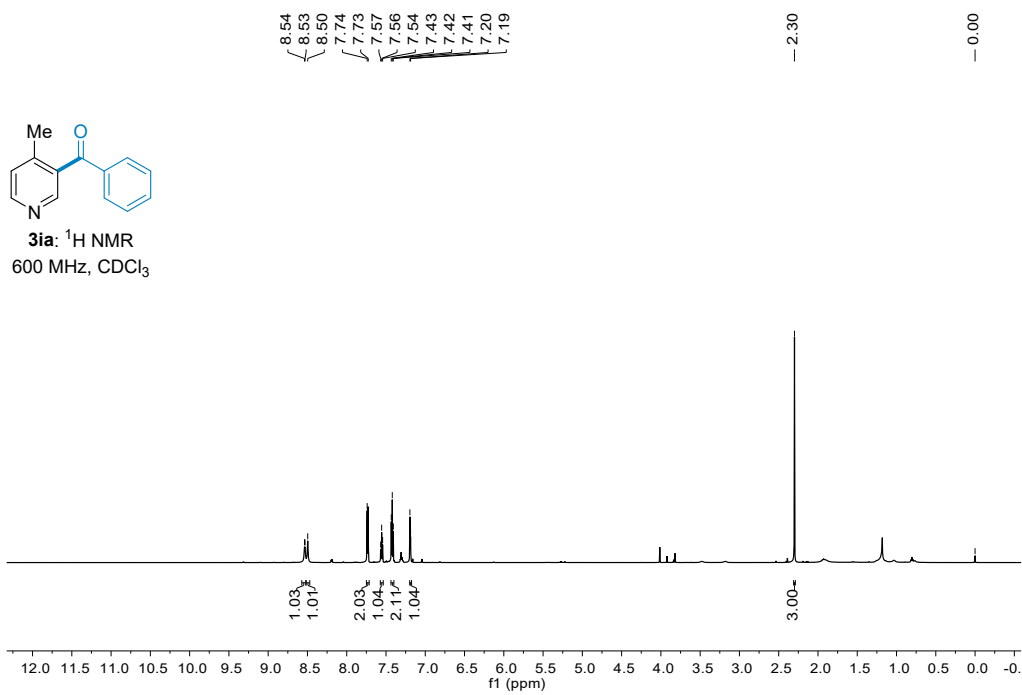

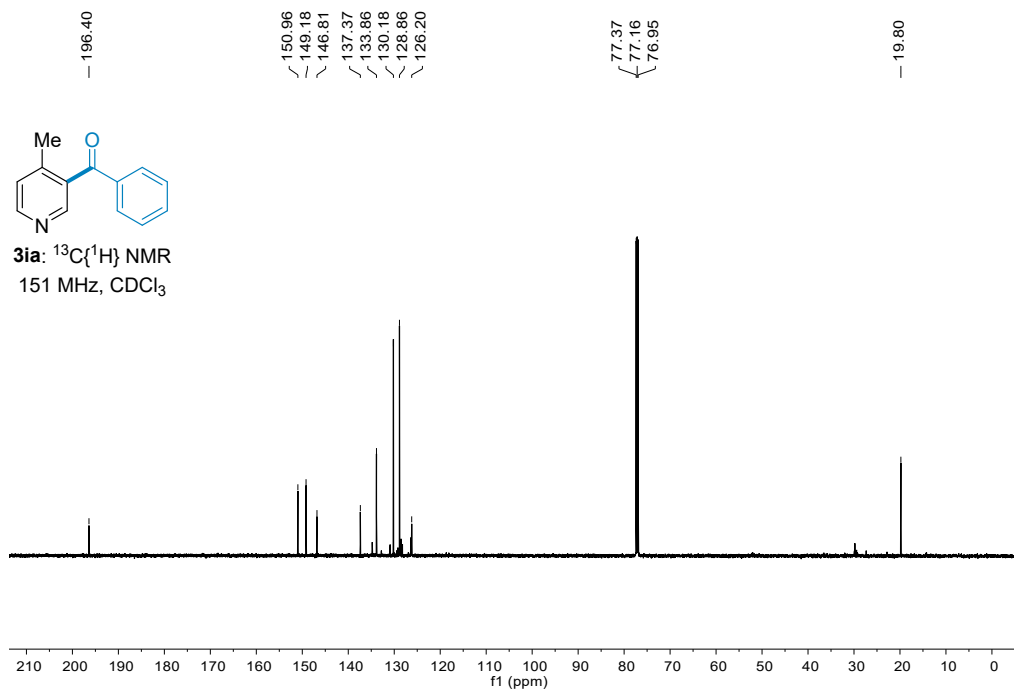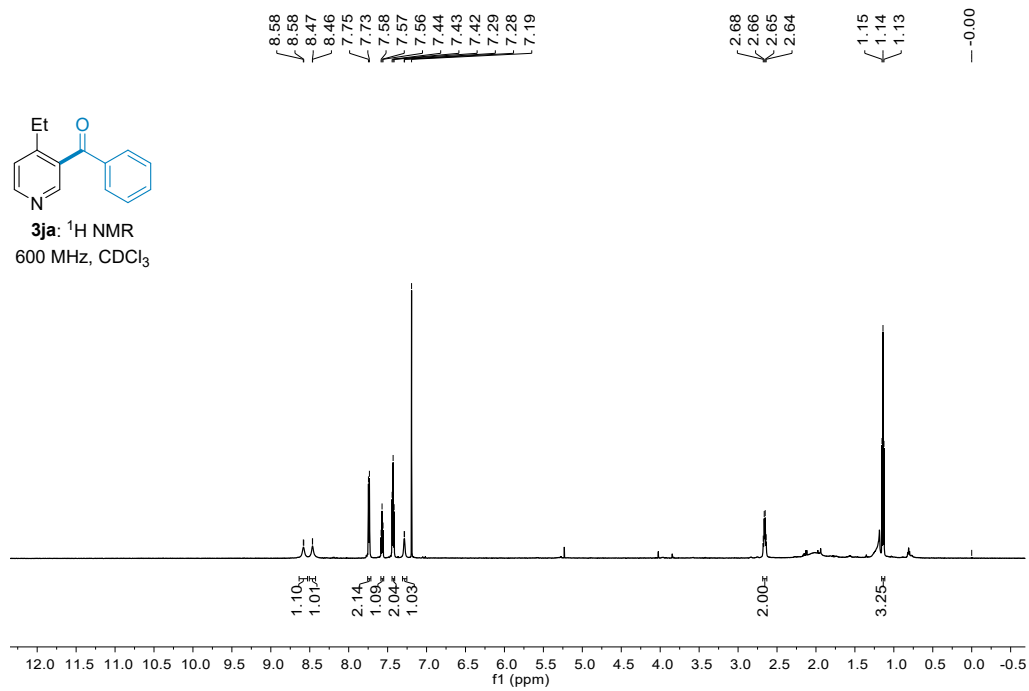

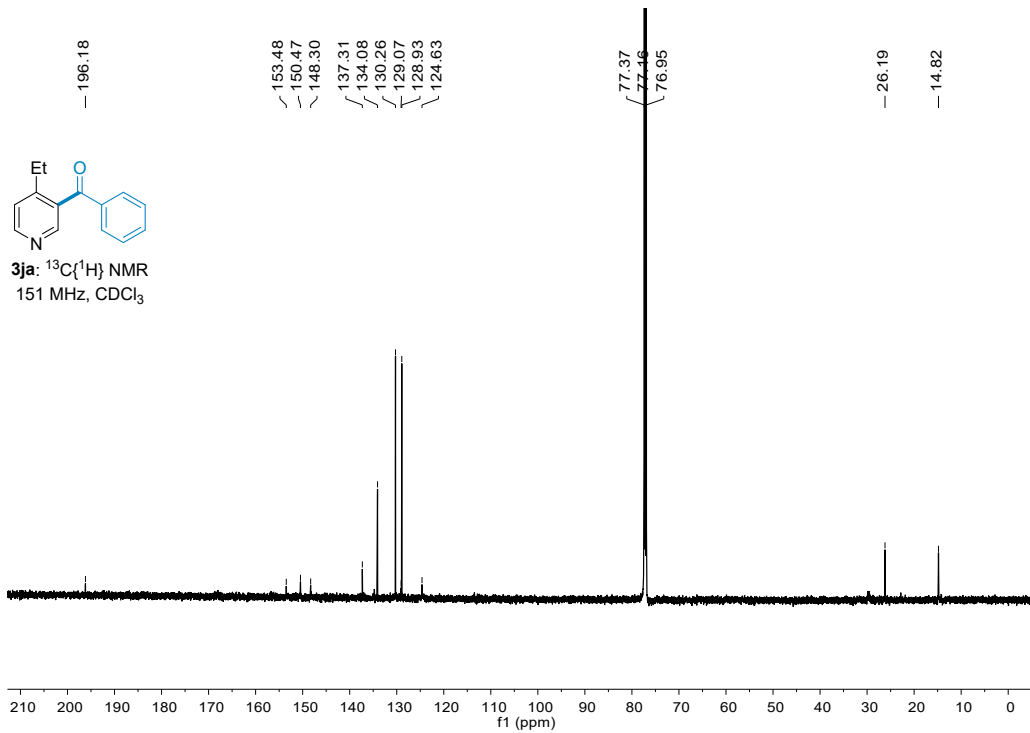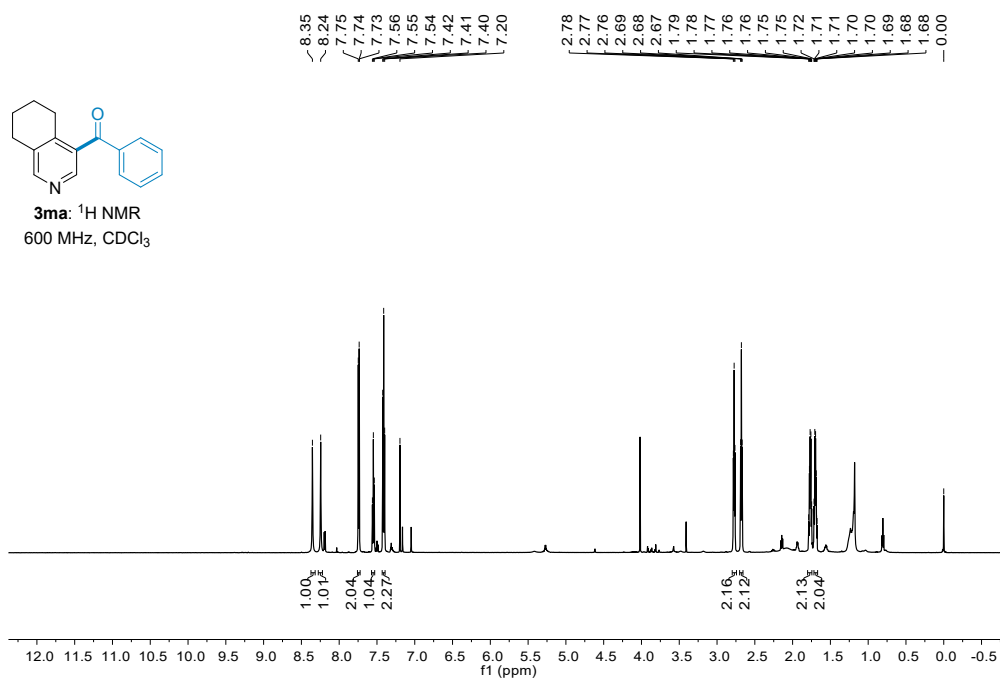

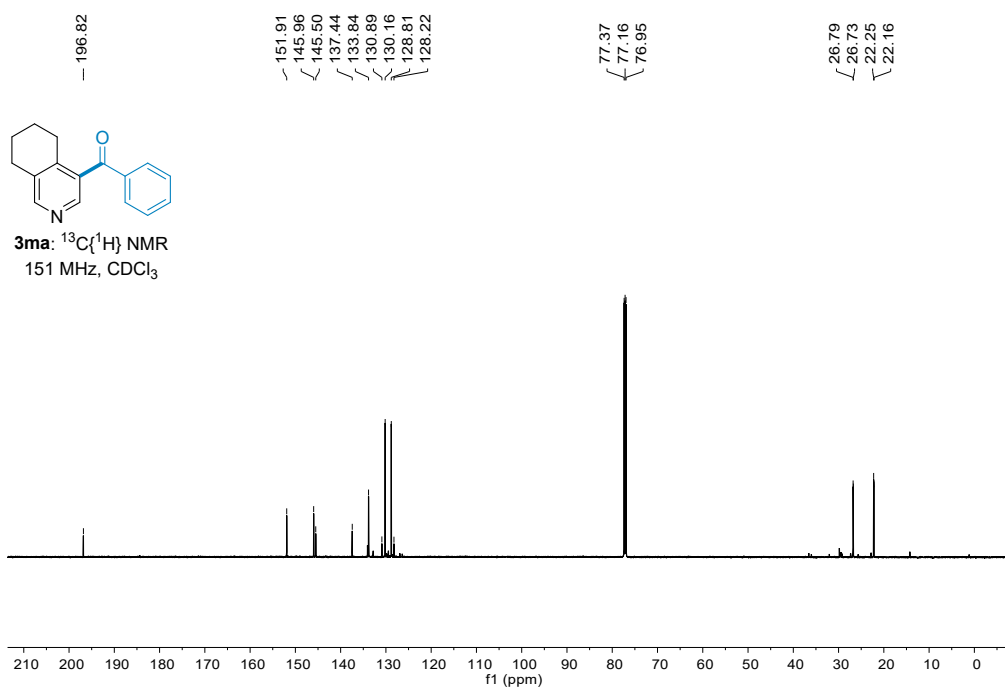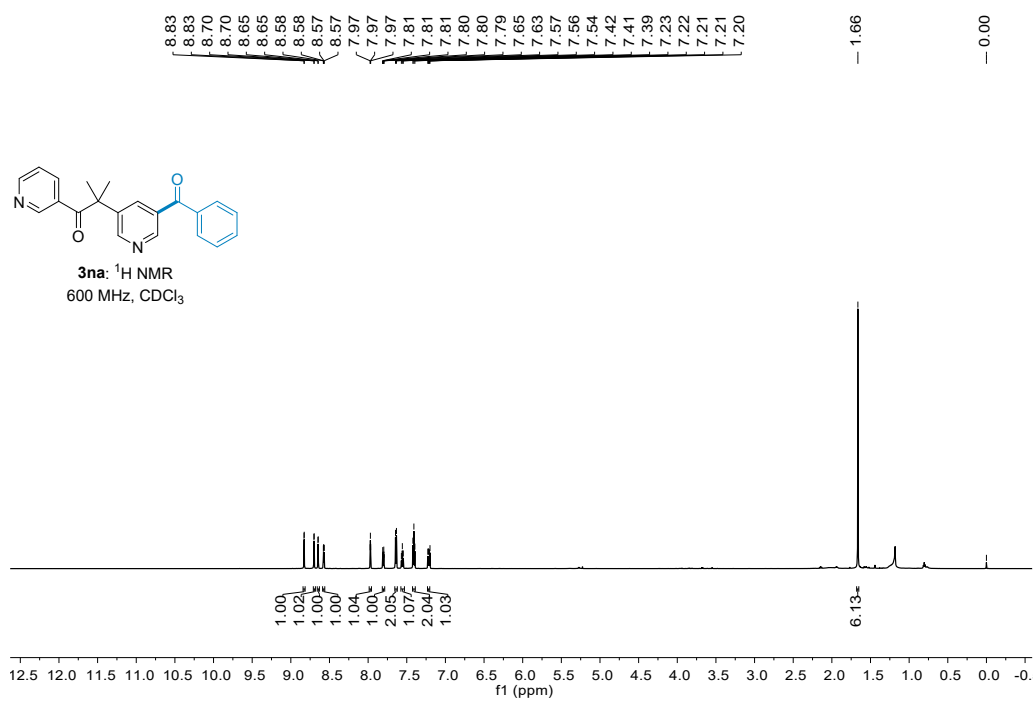

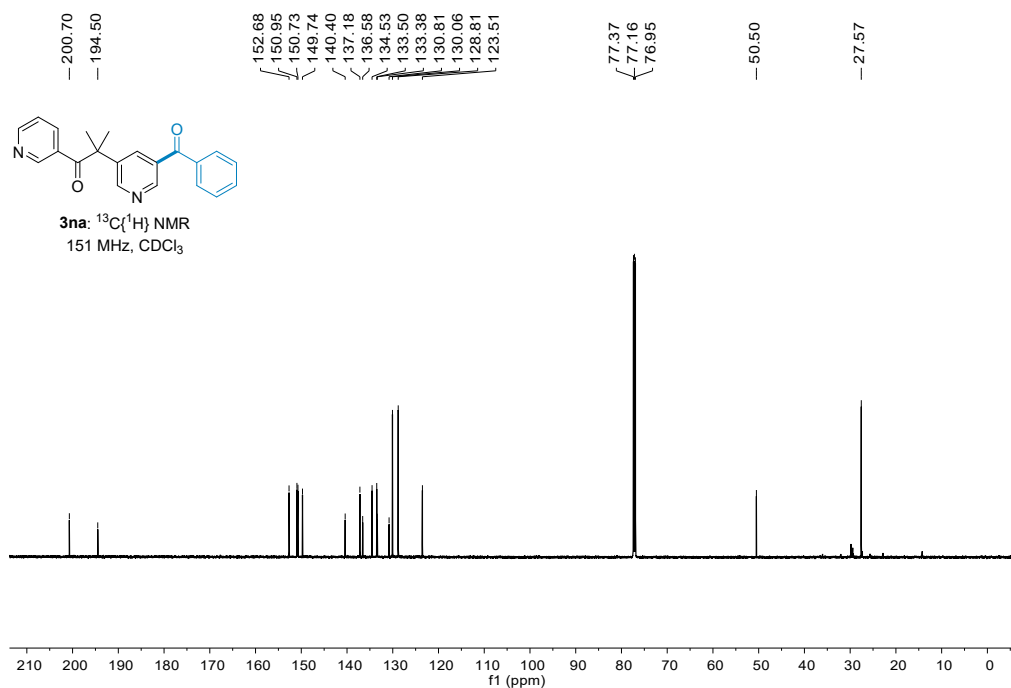

## 15. Reference

- (1) H. Cao, Q. Cheng, A. Studer, *Science* **2022**, *378*, 779.
- (2) M. J. Rourke, C. T. Wang, C. R. Schull, K. A. Scheidt, *ACS Catal.* **2023**, *13*, 7987.
- (3) J. L. Zhu, C. R. Schull, A. T. Tam, Á. Rentería-Gómez, A. R. Gogoi, O. Gutierrez, K. A. Scheidt, *J. Am. Chem. Soc.* **2023**, *145*, 1535–1541.
- (4) Y. Goto, H. Ohmiya, *Chem. Sci.* **2025**, *16*, 4320.
- (5) M. Lin, J. Luo, Y. Xie, G. Du, Z. Cai, B. Dai, L. He, *ACS Catal.* **2023**, *13*, 14503.
- (6) W. Hao, H. Liu, L. Yin, M. Cai, *J. Org. Chem.* **2016**, *81*, 4244.
- (7) M. Kuriyama, S. Nakashima, T. Miyagi, K. Sato, K. Yamamoto, O. Onomura, *Org. Chem. Front.* **2018**, *5*, 2364.
- (8) P. Halder, A. Iqbal, K. Mondal, N. Mukhopadhyay, P. Das, *J. Org. Chem.* **2023**, *88*, 15218.
- (9) H. Li, M. Yang, Y. Qi, J. Xue, *Eur. J. Org. Chem.* **2011**, *2011*, 2662.
- (10) H. Neumann, A. Brennfürher, M. Beller, *Chem. Eur. J.* **2008**, *14*, 3645.
- (11) M. Yang, M. Wang, H. Zhang, S. Qin, M. Zaman, J. Luo, S. Zhan, X. Wang, C. Zhang, S. Wang, H. Gao, Z. Zhou, A. S. K. Hashmi, W. Yi, Z. Zeng, *Chem. Catal.* **2025**, DOI:10.1016/j.cheecat.2025.101326.
- (12) P. Pratihar, M. T. Hoque, P. Das, R. Baidya, S. Khamarui, D. K. Maiti, *Org. Lett.* **2025**, *27*, 10494.
- (13) *Gaussian 16, Revision A.03*, M. J. Frisch, G. W. Trucks, H. B. Schlegel, G. E. Scuseria, M. A. Robb, J. R. Cheeseman, G. Scalmani, V. Barone, G. A. Petersson, H. Nakatsuji, X. Li, M. Caricato, A. V. Marenich, J.

- Bloino, B. G. Janesko, R. Gomperts, B. Mennucci, H. P. Hratchian, J. V. Ortiz, A. F. Izmaylov, J. L. Sonnenberg, D. Williams-Young, F. Ding, F. Lipparini, F. Egidi, J. Goings, B. Peng, A. Petrone, T. Henderson, D. Ranasinghe, V. G. Zakrzewski, J. Gao, N. Rega, G. Zheng, W. Liang, M. Hada, M. Ehara, K. Toyota, R. Fukuda, J. Hasegawa, M. Ishida, T. Nakajima, Y. Honda, O. Kitao, H. Nakai, T. Vreven, K. Throssell, J. A. Montgomery, Jr., J. E. Peralta, F. Ogliaro, M. J. Bearpark, J. J. Heyd, E. N. Brothers, K. N. Kudin, V. N. Staroverov, T. A. Keith, R. Kobayashi, J. Normand, K. Raghavachari, A. P. Rendell, J. C. Burant, S. S. Iyengar, J. Tomasi, M. Cossi, J. M. Millam, M. Klene, C. Adamo, R. Cammi, J. W. Ochterski, R. L. Martin, K. Morokuma, O. Farkas, J. B. Foresman, and D. J. Fox, Gaussian, Inc., Wallingford CT, 2016.
- (14) Becke, A. D. Density-functional thermochemistry. III. The role of exact exchange. *J. Chem. Phys.* **1993**, *98*, 5648-5652.
- (15) Lee, C.; Yang, W.; Parr, R. G. Development of the Colle-Salvetti correlation-energy formula into a functional of the electron density. *Physical Review B* **1988**, *37*, 785-789.
- (16) Stephens, P. J.; Devlin, F. J.; Chabalowski, C. F.; Frisch, M. J. Ab Initio Calculation of Vibrational Absorption and Circular Dichroism Spectra Using Density Functional Force Fields. *J. Phys. Chem.* **1994**, *98*, 11623-11627.
- (17) Grimme, S.; Hansen, A.; Brandenburg, J. G.; Bannwarth, C. Dispersion-Corrected Mean-Field Electronic Structure Methods. *Chem. Rev.* **2016**, *116*, 5105-5154.
- (18) Grimme, S.; Ehrlich, S.; Goerigk, L. Effect of the damping function in dispersion corrected density functional theory. *J. Comput. Chem.* **2011**, *32*, 1456-1465.
- (19) Weigend, F.; Ahlrichs, R. Balanced basis sets of split valence, triple zeta valence and quadruple zeta valence quality for H to Rn: Design and assessment of accuracy. *Phys. Chem. Chem. Phys.* **2005**, *7*, 3297-3305.
- (20) Marenich, A. V.; Cramer, C. J.; Truhlar, D. G. Universal Solvation Model Based on Solute Electron Density and on a Continuum Model of the Solvent Defined by the Bulk Dielectric Constant and Atomic Surface Tensions. *J. Phys. Chem. B* **2009**, *113*, 6378-6396.
- (21) Neese, F. The ORCA quantum chemistry program package. *WIREs Comput Mol Sci* **2012**, *2*, 73-78.
- (22) Fernandes, A. A.; Singh, A. K.; Begum, S. J.; Sarkar, S.; Varadharajan, E.; Ruidas, S.; Das, A.; Patra, A. K.; Roy, L.; Bhaumik, A.; Dalapati, S. Accessing Triplet State via Enhanced Intersystem Crossing in Covalent Organic Frameworks for Natural Sunlight-Driven Photocatalysis. *ChemSusChem* **2026**, *19*, e202502392.
- (23) Tian, L.; Feiwu, C. Multiwfn: A multifunctional wavefunction analyzer. *J. Comput. Chem.* **2012**, *33*, 580-592.
- (24) Humphrey, W.; Dalke, A.; Schulten, K. VMD: Visual molecular dynamics. *J. Mol. Graph.* **1996**, *14*, 33-38.
